# Supplementary material for: Novel rhodanine–thiazole hybrids as potential antidiabetic agents: a structure-based drug design approach
Source: Royal Society of Chemistry journal article supplement (doi:10.1039/d4md00689e), 2024-11-21
Supplement: d4md00689e1.pdf [file d4md00689e1.pdf]

**Title**

**Novel rhodanine-thiazole hybrids as potential antidiabetic agents: A structure-based drug design approach**

Shankar Gharge <sup>a</sup>, Shankar G. Alegaon <sup>a,\*</sup>, Shriram D. Ranade <sup>a</sup>, Rohini S. Kavalapure <sup>a</sup>, B. R. Prashantha Kumar <sup>b</sup>

<sup>a</sup>Department of Pharmaceutical Chemistry, KLE College of Pharmacy, Belagavi, KLE Academy of Higher education and Research, Belagavi - 590 010, Karnataka, India

<sup>b</sup>Department of Pharmaceutical Chemistry, JSS College of Pharmacy, Mysuru, JSS Academy of Higher Education and Research, Mysuru-570015, Karnataka, India

**Corresponding author**

Shankar G. Alegaon: Department of Pharmaceutical Chemistry, KLE College of Pharmacy, Belagavi, KLE Academy of Higher education and Research, Belagavi - 590 010, Karnataka, India. Tel.: +91 8312471399; E-mail: [sgalegaon@klepharm.edu](mailto:sgalegaon@klepharm.edu), [sgalegaon@klepharm.edu](mailto:sgalegaon@klepharm.edu) (Shankar G. Alegaon)

### Spectral Data of Synthesized Derivatives (3a-3b):

**(Z)-4-((4-oxo-2-thioxothiazolidin-5-ylidene) methyl) benzaldehyde (3a):** Orange powder; yield: 90 %, m.p.: >300°C. FTIR (KBr, cm<sup>-1</sup>): 3018.73 (N-H), 2861.52 (C-H str of -CHO), 1724.44 (C=O), 1663.68 (C=C). <sup>1</sup>H NMR [400.MHz, δ ppm, DMSO-d<sub>6</sub>] δ: 7.65-7.77 (m, 3H, Ar-H), 7.99-8.09 (m, 2H, Ar-H), 10.11 (s, 1H, -CHO), 13.96 (s, 1H, -NH). **(Z)-2-(5-(4-formylbenzylidene)-4-oxo-2-thioxothiazolidin-3-yl) acetic acid (3b):** Yellow solid powder, yield: 86%, m.p.: >300°C. FTIR (KBR, cm<sup>-1</sup>): 3029.34 (-OH str of -COOH), 3010.05 (N-H), 2848.98 (C-H str of -CHO), 1603.88 (C=O), 1508.40 (C=C). <sup>1</sup>H NMR [400 MHz, δ ppm, DMSO-d<sub>6</sub>] δ: 4.68 (s,2H, -CH<sub>2</sub>), 7.80-7.84 (m, 3H, Ar-H), 7.92-8.01 (m, 2H, Ar-H), 8.03 (s, 1H, -OH),10.03 (s, 1H, -CHO).

### Spectral Data of Synthesized Analogs (6a-6f):

**2-hydrazinyl-4-phenylthiazole (6a):** These analogs were synthesized by general procedure, Orange solid powder; yield: 86 %, m.p.: 168-170°C. FTIR (KBr, cm<sup>-1</sup>): 3337.96 (N-H), 1633.78 (C=O), 1549.87 (C=C). **2-hydrazinyl-4-(p-tolyl) thiazole (6b):** Orange solid powder; yield: 88 %, m.p.: 168-170°C. FTIR (KBr, cm<sup>-1</sup>): 3354.35 (N-H), 1639.56 (C=O), 1552.62 (C=C). **4-(4-fluorophenyl)-2-hydrazinylthiazole (6c):** Dark purple solid powder; yield: 82 %, m.p.: 175-177°C. FTIR (KBr, cm<sup>-1</sup>): 3186.54 (N-H), 1600.02 (C=O), 1558.55 (C=C). **2-hydrazinyl-4-(4-methoxyphenyl) thiazole (6d):** Brown solid powder; yield: 93 %, m.p.: 169-171°C. FTIR (KBr, cm<sup>-1</sup>): 3472.02 (N-H), 2841.27(-OCH<sub>3</sub>), 1630.88 (C=O), 1558.56 (C=C). **4-(4-chlorophenyl)-2-hydrazinylthiazole (6e):** Red solid powder; yield: 86 %, m.p.: 178-180°C. FTIR (KBr, cm<sup>-1</sup>): 3407.40 (N-H), 1537.33 (C=O), 1523.83 (C=C). **4-(4-bromophenyl)-2-hydrazinylthiazole (6f):** Brown solid powder; yield: 91 %, m.p.: 168-170°C. FTIR (KBr, cm<sup>-1</sup>): 3400.65 (N-H), 1608 (C=O), 1545.05 (C=C).

table. S1: Toxicity results on normal mouse fibroblast L929 cell lines.

| Comp | Percent survival<br>L929 cell lines |           |
|------|-------------------------------------|-----------|
|      | 125 ug/ml                           | 250 ug/ml |
| 7a   | 89.38                               | 83.53     |
| 7b   | 88.37                               | 82.09     |
| 7c   | 82.22                               | 78.17     |
| 7d   | 76.31                               | 77.84     |
| 7e   | 91.25                               | 85.22     |
| 7f   | 90.17                               | 84.12     |
| 7g   | 88.85                               | 82.42     |
| 7h   | 86.24                               | 80.08     |
| 7i   | 81.89                               | 76.12     |
| 7j   | 87.07                               | 81.84     |
| 7k   | 86.01                               | 80.18     |
| 7l   | 89.26                               | 83.19     |

table. S2: Enrichment analysis of modulated proteins by the compounds 7a-7l.

| Pathway (KEGG ID)                 | OGC/BGC | Strength | FDR      | Proteins                                                                                        |
|-----------------------------------|---------|----------|----------|-------------------------------------------------------------------------------------------------|
| MAPK signaling pathway (hsa04010) | 0.0594  | 1.24     | 5.17E-14 | MAPK1,MAPK14,FLT3,PDGFRB,KDR,EGFR, KIT,DUSP16,INSR,CASP3,MET,PLA2G4A,GRB2,MAPK8,FGFR1,TNF,FGFR2 |
| Insulin resistance (hsa04931)     | 0.1038  | 1.48     | 1.26E-11 | PYGM,PYGL,CPT1A,INSR,GYS1,PRKCD,MT                                                              |

|                                                                 |        |      |          |                                                                                                                                 |
|-----------------------------------------------------------------|--------|------|----------|---------------------------------------------------------------------------------------------------------------------------------|
| PPAR signaling pathway (hsa03320)                               | 0.0430 | 1.1  | 4.35E-11 | OR,PTPN1,MAPK8,PPARA,TNF,GLUT<br>MAPK1,FLT3,PDGFRB,KDR,EGFR,KIT,INSR,<br>GLUT,MET,GYS1,HSP90AA1,PTK2,MTOR,C<br>PT1A,PPARG,PPARA |
| Insulin signaling pathway (hsa04910)                            | 0.0758 | 1.35 | 1.42E-09 | PYGM,MAPK1,PYGL,GCK,INSR,GYS1,MTOR,<br>PTPN1, AMY2A, GAA                                                                        |
| Starch and sucrose metabolism (hsa00500)                        | 0.1250 | 1.57 | 2.20E-09 | MAPK1, AMY2A, GAA,<br>SERPINE1,CASP3,PRKCD,SELE,MAPK8,TNF<br>,GLUT                                                              |
| Type II diabetes mellitus (hsa04930)                            | 0.1556 | 1.66 | 1.06E-08 | MAPK1,AMY2A,<br>GCK,INSR,PRKCD,MTOR,MAPK8,TNF, GAA                                                                              |
| Glycogen metabolism (hsa04922)                                  | 0.0700 | 1.31 | 8.93E-07 | PYGM,PYGL,GCK,GAA,<br>CPT1A,GYS1,PPARA, , AMY2A                                                                                 |
| Adipocytokine signaling pathway (hsa04920)                      | 0.0735 | 1.33 | 3.25E-05 | CPT1A,MTOR,MAPK8,PPARA,TNF                                                                                                      |
| FoxO signaling pathway (hsa04068)                               | 0.0476 | 1.15 | 3.59E-05 | MAPK1,MAPK14,EGFR,INSR,GRB2,MAPK8                                                                                               |
| AGE-RAGE signaling pathway in diabetic complications (hsa04933) | 0.0938 | 1.44 | 3.86E-05 | PYGM,PYGL,GCK,GYS1                                                                                                              |
| AMPK signaling pathway (hsa04152)                               | 0.0417 | 1.09 | 0.00027  | CPT1A,PPARG,INSR,GYS1,MTOR                                                                                                      |
| mTOR signaling pathway (hsa04150)                               | 0.0333 | 0.99 | 0.00071  | MAPK1,INSR,MTOR,GRB2,TNF                                                                                                        |
| JAK-STAT signaling pathway (hsa04630)                           | 0.0253 | 0.87 | 0.0068   | PDGFRB,EGFR,MTOR,GRB2                                                                                                           |
| PI3K-Akt signaling pathway (hsa04151)                           | 0.0400 | 1.07 | 0.0071   | GRB2,FGFR1,FGFR2                                                                                                                |
| Insulin secretion (hsa04911)                                    | 0.0366 | 1.03 | 0.009    | GCK,CCKAR,GLP1R                                                                                                                 |
| Pancreatic secretion (hsa04972)                                 | 0.0309 | 0.96 | 0.0131   | CA2,CCKAR,PLA2G2A                                                                                                               |
| Glycolysis / Gluconeogenesis (hsa00010)                         | 0.0313 | 0.96 | 0.0489   | GAA, GCK,LDHA, , AMY2A                                                                                                          |

Were, OGC: Observed gene count, BGC: Background gene count, FDR: False discovery rate

**table. S3: Binding affinity and interactions of compounds (7a-7l) in  $\alpha$ -amylase binding pocket (PDB ID: 4W93) using Glide module of Schrodinger's.**

| Compounds | Docking Score (XP) | Glide Energy (Kcal/mol) | Amino Acids                           |
|-----------|--------------------|-------------------------|---------------------------------------|
| <b>7a</b> | -4.82              | -45.98                  | <b>ASP197, TRP58, TYR62</b>           |
| <b>7b</b> | -6.15              | -52.49                  | <b>HIE201, ASP197, HIE299, TYR151</b> |
| <b>7c</b> | -6.13              | -53.42                  | <b>HIE201, ASP197, HIE299, TYR151</b> |
| <b>7d</b> | -5.76              | -53.56                  | <b>HIE201, TYR151, ASP197, HIE299</b> |
| <b>7e</b> | <b>-6.21</b>       | -52.90                  | <b>HIE201, ASP197, HIE299, TYR151</b> |
| <b>7f</b> | <b>-6.25</b>       | -51.53                  | <b>HIE201, ASP197, HIE299, TYR151</b> |
| <b>7g</b> | -6.02              | -52.80                  | <b>HIE201, LYS200, TRP59, TYR151</b>  |

|          |        |        |                                                                               |
|----------|--------|--------|-------------------------------------------------------------------------------|
| 7h       | -6.22  | -58.47 | <i>HIE201, LYS200, ASP197, HIE299, TYR151</i>                                 |
| 7i       | -5.73  | -55.24 | <i>ASP356, ARG195, ASP197, HIE201, TYR15</i>                                  |
| 7j       | -5.02  | -50.79 | <i>GLU233, ARG195, ASP356</i>                                                 |
| 7k       | -5.81  | -49.26 | <i>ASP197, ARG195, ASP356</i>                                                 |
| 7l       | -5.45  | -55.17 | <i>ASP197, ARG195, HIE201, TYR151, ASP356</i>                                 |
| Acarbose | -10.15 | -63.80 | <i>ARG195, ASP197, LYS200, HIE201, GLU240, TYR151, ILE235, GLU233, HIE299</i> |

table. S4: Binding affinity and interactions of compounds (7a-l) in  $\alpha$ -glucosidase binding pocket (PDB ID: 3A47) using Glide module of Schrodinger's.

| Compounds | Docking Score (XP) | Glide Energy (Kcal/mol) | Amino Acids                                           |
|-----------|--------------------|-------------------------|-------------------------------------------------------|
| 7a        | -5.21              | -58.93                  | <i>HIE239, LYS155, PHE157, ASH214</i>                 |
| 7b        | -4.28              | -56.99                  | <i>GLU276, HIE279, HIE239, HIS245</i>                 |
| 7c        | -4.76              | -62.21                  | <i>GLU276, ASH214, HIE279, HIS245, HIE239, ASN241</i> |
| 7d        | -5.27              | -47.02                  | <i>HIE239, PHE157, LYS155</i>                         |
| 7e        | -5.73              | -55.21                  | <i>HIE239, LYS155, PHE157, ASH214</i>                 |
| 7f        | -5.83              | -50.71                  | <i>HIE239, PHE157, LYS155, ASH214</i>                 |
| 7g        | <b>-6.35</b>       | -54.17                  | <i>HIE239, PHE157, GLU304, GLY306, PRO317</i>         |
| 7h        | -5.56              | -58.04                  | <i>GLN350, GLU276, HIE279, PRO309,</i>                |
| 7i        | -5.83              | -50.71                  | <i>HIE239, PHE157</i>                                 |
| 7j        | -4.71              | -57.09                  | <i>ARG439, PHE157, HIE239, ASN241, ASN246</i>         |
| 7k        | <b>-6.45</b>       | -54.29                  | <i>HIE239, PHE157, GLU304, GLY306, PRO317</i>         |
| 7l        | -4.954             | -54.75                  | <i>ARG439, PHE157, HIE239, ASN241</i>                 |
| Acarbose  | -9.83              | -58.14                  | <i>GLU304, PHE157, ASP408, HIE239</i>                 |

table. S5: Binding affinity and interactions of compounds (7a-l) in PPAR- $\gamma$  binding pocket (PDB ID: 5Y2O) using Glide module of Schrodinger's.

| Compounds | Docking Score (XP) | Glide Energy (Kcal/mol) | Amino Acids                   |
|-----------|--------------------|-------------------------|-------------------------------|
| 7a        | -8.02              | -57.40                  | <i>HIE323, SER289, TYR473</i> |
| 7b        | -7.6               | -52.75                  | <i>CYS285, ARG288</i>         |
| 7c        | -7.17              | -55.67                  | <i>CYS285, ARG288</i>         |
| 7d        | -7.17              | -52.53                  | <i>TYR327, CYS285</i>         |

|                     |               |               |                                       |
|---------------------|---------------|---------------|---------------------------------------|
| <b>7e</b>           | <b>-8.23</b>  | -60.74        | <b>HIE323, SER289, TYR473, GLU259</b> |
| <b>7f</b>           | <b>-8.65</b>  | -55.22        | <b>HIE323, SER289, TYR473, GLU259</b> |
| <b>7g</b>           | -7.3          | -50.39        | TYR327, HIE449                        |
| <b>7h</b>           | -7.17         | -56.71        | CYS285, ARG288                        |
| <b>7i</b>           | -7.6          | -52.75        | CYS285                                |
| <b>7j</b>           | -7.12         | -54.88        | TYR327                                |
| <b>7l</b>           | -6.94         | -55.07        | TYR327                                |
| <b>7k</b>           | -7.12         | -55.77        | TYR327, CYS285                        |
| <b>Pioglitazone</b> | <b>-10.57</b> | <b>-59.11</b> | <b>HIE323, SER289, TYR473</b>         |

table. S6: MM/GBSA Calculation of synthesized compounds (7a-l).

| Comp                                                                 | Prime Energy<br>Kcal/mol | Complex Energy<br>Kcal/mol | MMGBSA<br>dG Bind<br>Kcal/mol | MMGBSA dG Bind Hbond<br>Kcal/mol | MMGBSA<br>dG Bind vdW<br>Kcal/mol |
|----------------------------------------------------------------------|--------------------------|----------------------------|-------------------------------|----------------------------------|-----------------------------------|
| <b><math>\alpha</math>-amylase binding pocket (PDB ID: 4W93)</b>     |                          |                            |                               |                                  |                                   |
| <b>7a</b>                                                            | -20694.2                 | -20694.1                   | -42.9                         | -1.24                            | -48.7                             |
| <b>7b</b>                                                            | -20705.9                 | -20705.8                   | -53.0                         | -1.46                            | -47.7                             |
| <b>7c</b>                                                            | -20703.1                 | -20703.0                   | -51.5                         | -1.44                            | -48.24                            |
| <b>7d</b>                                                            | -20709.7                 | -20709.7                   | -51.4                         | -1.46                            | -48.5                             |
| <b>7e</b>                                                            | -20705.3                 | -20705.3                   | -61.2                         | -1.45                            | -47.6                             |
| <b>7f</b>                                                            | -20705.0                 | -20704.9                   | -61.7                         | -1.45                            | -46.24                            |
| <b>7g</b>                                                            | -20710.1                 | -20710.1                   | -50.8                         | -1.74                            | -52.6                             |
| <b>7h</b>                                                            | -20732.5                 | -20732.4                   | -59.1                         | -2.91                            | -52.94                            |
| <b>7i</b>                                                            | -20723.7                 | -20723.7                   | -50.0                         | -2.30                            | -57.9                             |
| <b>7j</b>                                                            | -20735.4                 | -20735.3                   | -48.4                         | -0.09                            | -54.1                             |
| <b>7k</b>                                                            | -20720.6                 | -20720.6                   | -48.1                         | -1.40                            | -52.4                             |
| <b>7l</b>                                                            | -20720.6                 | -20720.5                   | -41.2                         | -1.26                            | -55.1                             |
| <b><math>\alpha</math>-glucosidase binding pocket (PDB ID: 3A47)</b> |                          |                            |                               |                                  |                                   |
| <b>7a</b>                                                            | -24384.2                 | -24384.2                   | -44.2                         | -1.63                            | -55.1                             |
| <b>7b</b>                                                            | -24374.8                 | -24374.8                   | -40.1                         | -1.16                            | -59.4                             |
| <b>7c</b>                                                            | -24390.0                 | -24389.9                   | -39.2                         | -1.46                            | -58.9                             |
| <b>7d</b>                                                            | -24398.8                 | -24398.7                   | -48.2                         | -1.64                            | -53.8                             |

|           |          |          |       |       |       |
|-----------|----------|----------|-------|-------|-------|
| <b>7e</b> | -24388.2 | -24388.2 | -57.9 | -1.52 | -50.9 |
| <b>7f</b> | -24383.1 | -24383.1 | -58.0 | -1.0  | -56.8 |
| <b>7g</b> | -24406.4 | -24406.4 | -62.1 | -1.85 | -51.2 |
| <b>7h</b> | -24405.1 | -24405.0 | -33.3 | -1.94 | -60.0 |
| <b>7i</b> | -24392.1 | -24392.6 | -46.1 | -1.38 | -62.1 |
| <b>7j</b> | -24407.2 | -24407.2 | -42.1 | -1.44 | -55.6 |
| <b>7k</b> | -24403.3 | -24403.3 | -42.9 | -0.80 | -55.8 |
| <b>7l</b> | -24413.7 | -24413.7 | -63.2 | -1.86 | -50.9 |

**PPAR- $\gamma$  binding pocket (PDB ID: 5Y2O)**

|           |           |           |       |        |       |
|-----------|-----------|-----------|-------|--------|-------|
| <b>7a</b> | -10934.5  | -10934.5  | -70.0 | -0.94  | -55.3 |
| <b>7b</b> | -10922.1  | -10922.1  | -60.0 | -0.001 | -61.1 |
| <b>7c</b> | -10891.3  | -10891.3  | -62.8 | -1.8   | -58.2 |
| <b>7d</b> | -10913.8  | -10913.8  | -69.2 | -0.45  | -62.1 |
| <b>7e</b> | -10915.2  | -10915.2  | -69.6 | -1.8   | -57.1 |
| <b>7f</b> | 10905.2   | 10905.2   | -70.7 | -0.24  | -63.9 |
| <b>7g</b> | -10927.5  | -10927.5  | -60.9 | 0      | -55.6 |
| <b>7h</b> | -10880.3  | -10880.3  | -69.1 | -0.001 | -67.0 |
| <b>7i</b> | -10919.3  | -10919.3  | -62.1 | -0.004 | -60.1 |
| <b>7j</b> | -10911.17 | -10911.17 | -64.7 | -0.77  | -67.6 |
| <b>7k</b> | -10936.6  | -10936.6  | -65.0 | 0      | -61.7 |
| <b>7l</b> | -10889.7  | -10889.7  | -64.9 | -0.001 | -62.8 |

**table. S7: Final Energy of Geometry optimized structures.**

| <b>Compound</b> | <b>ESP mean (kcal/mol)</b> | <b>Gas Phase Energy (eV)</b> | <b>Final Energy</b> |
|-----------------|----------------------------|------------------------------|---------------------|
| <b>7a</b>       | -42.41                     | -2259.39221                  | -2259.39221         |
| <b>7b</b>       | -42.6                      | -2298.673487                 | -2298.673487        |
| <b>7c</b>       | -40.29                     | -2358.58469                  | -2358.58469         |
| <b>7d</b>       | -42.92                     | -2373.878607                 | -2373.878607        |
| <b>7g</b>       | -43.52                     | -2487.283448                 | -2487.283448        |
| <b>7h</b>       | -41.35                     | -2526.555163                 | -2526.555163        |
| <b>7i</b>       | -41.92                     | -2586.515849                 | -2586.515849        |
| <b>7j</b>       | -43.06                     | -2601.812524                 | -2601.812524        |
| <b>7k</b>       | -40.88                     | -2371.6723                   | -2371.6723          |
| <b>7l</b>       | -39.8                      | -5060.56535                  | -5060.56535         |

**table. S8: Calculated quantum chemical parameters of synthesized compounds Molecular electrostatic Potential Surface.**

| Quantum chemical parameters            | 7a       | 7b        | 7c       | 7d        | 7g       | 7h      |
|----------------------------------------|----------|-----------|----------|-----------|----------|---------|
| $E_{\text{HOMO}}$ (eV)                 | -0.20284 | -0.19976  | -0.20404 | -0.1935   | -0.20191 | -0.1994 |
| $E_{\text{LUMO}}$ (eV)                 | -0.10954 | -0.10893  | -0.11062 | -0.1086   | -0.10699 | -0.1067 |
| $\Delta E_{\text{GAP}}$ (eV)           | 0.0933   | 0.09083   | 0.09342  | 0.0849    | 0.09491  | 0.0927  |
| Hardness ( $\eta$ )                    | 0.0466   | 0.04541   | 0.04671  | 0.0424    | 0.047458 | 0.04635 |
| dipole moment ( $\mu$ )                | -0.2576  | -0.25422  | -0.2593  | -0.2478   | -0.255   | -0.2527 |
| excitation binding energy ( $\omega$ ) | 0.001547 | 0.00147   | 0.00157  | 0.00130   | 0.001543 | 0.00148 |
| Softness ( $\sigma$ )                  | 21.46    | 22.02     | 21.40    | 23.58     | 21.08    | 21.57   |
| Quantum chemical parameters            | 7i       | 7j        | 7k       | 7l        |          |         |
| $E_{\text{HOMO}}$ (eV)                 | -0.20333 | -0.193729 | -0.20667 | -0.2054   |          |         |
| $E_{\text{LUMO}}$ (eV)                 | -0.10778 | -0.109387 | -0.10831 | -0.10913  |          |         |
| $\Delta E_{\text{GAP}}$ (eV)           | 0.095556 | 0.084342  | 0.098362 | 0.0962    |          |         |
| Hardness ( $\eta$ )                    | 0.04777  | 0.042171  | 0.049181 | 0.0481    |          |         |
| dipole moment ( $\mu$ )                | -0.257   | -0.248    | -0.260   | -0.259    |          |         |
| excitation binding energy ( $\omega$ ) | 0.001547 | 0.001296  | 0.001664 | 0.0016131 |          |         |
| Softness ( $\sigma$ )                  | 20.92    | 23.71     | 20.33    | 20.79     |          |         |

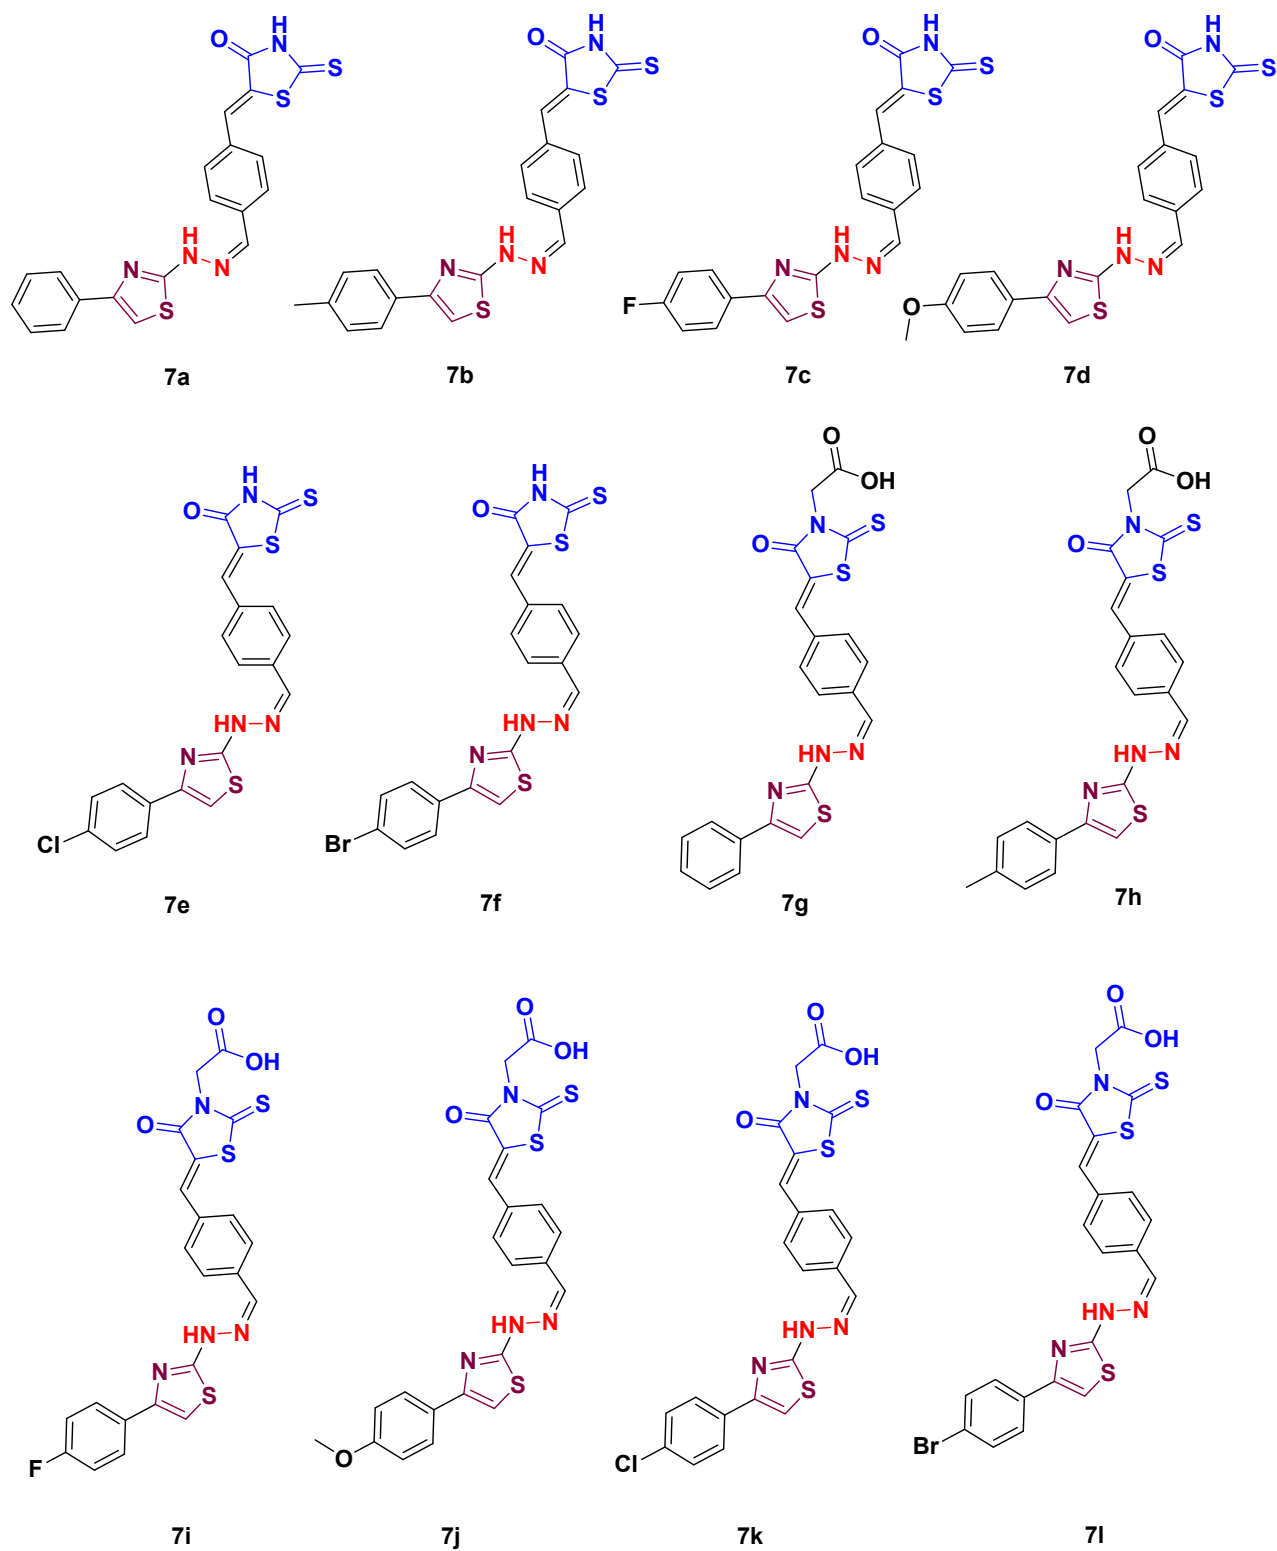

Figure S1. Chemical structures of synthesized compounds (7a-7l).



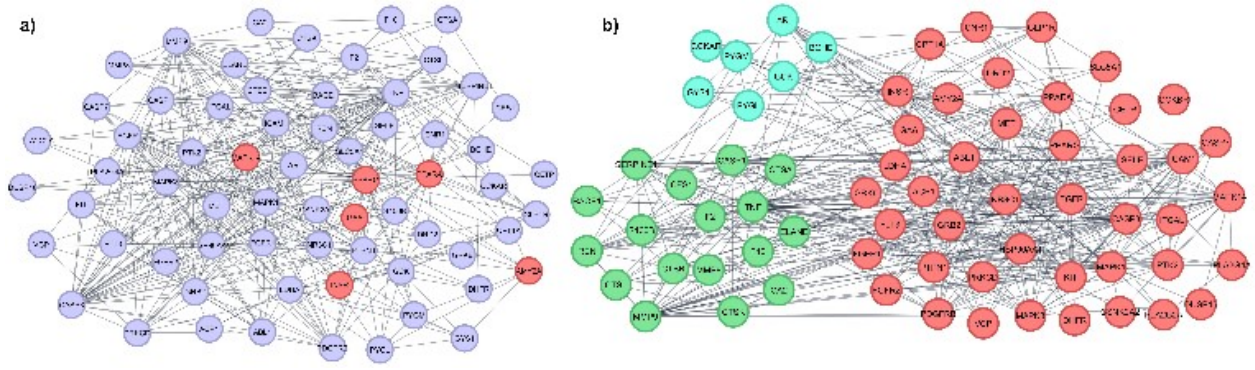

**Fig. S2:** (a) STRING identified Protein-protein interaction and (b) The cluster analysis where cluster 1: red; cluster 2: green; cluster 3: blue.

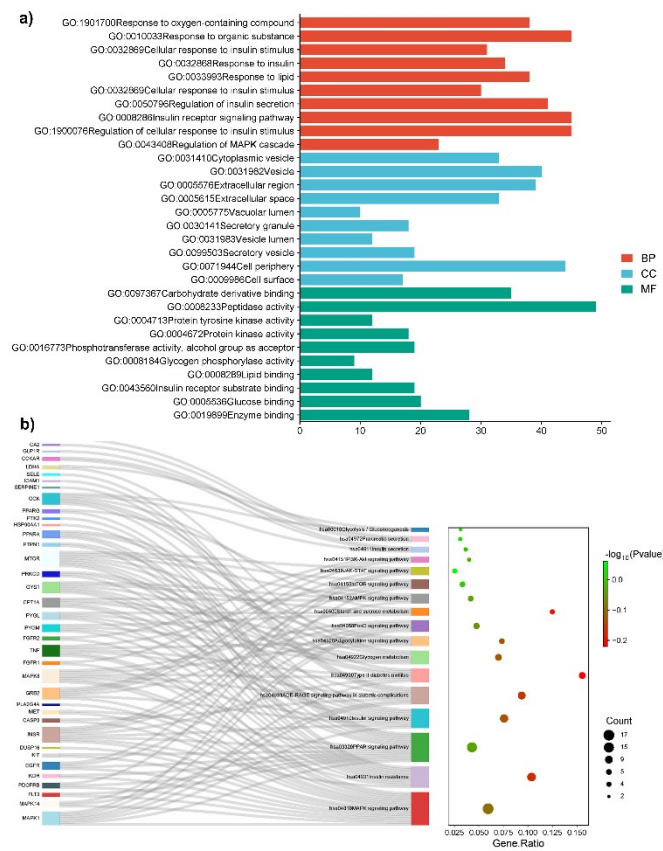

**Figure S3.** a) The Gene ontology for the top 10 modulated proteins by biological processes (orange), Molecular function (blue), and cellular components (green), b) Bubble plot represents KEGG enrichment pathways related to GeneCount.

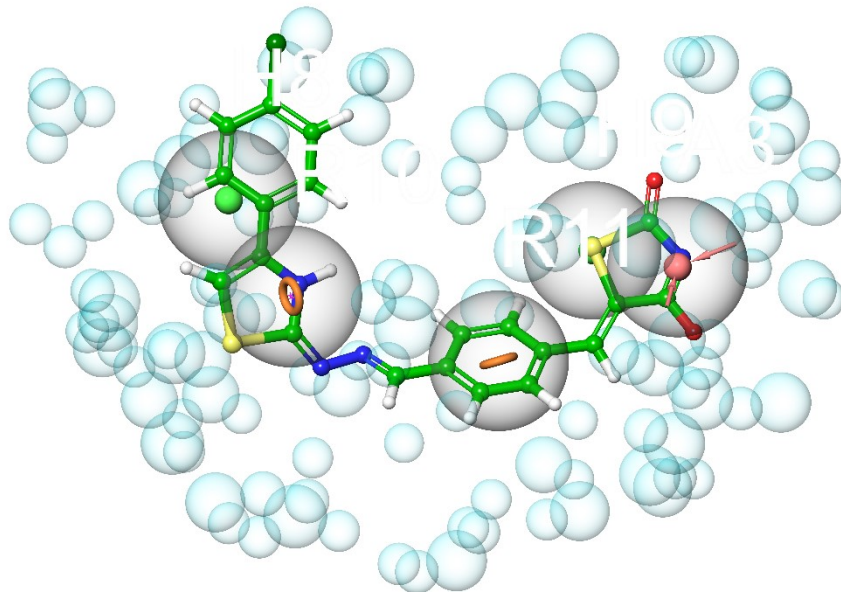

Figure S4. Designed compound 7e based on e-pharmacophore modelling

7a

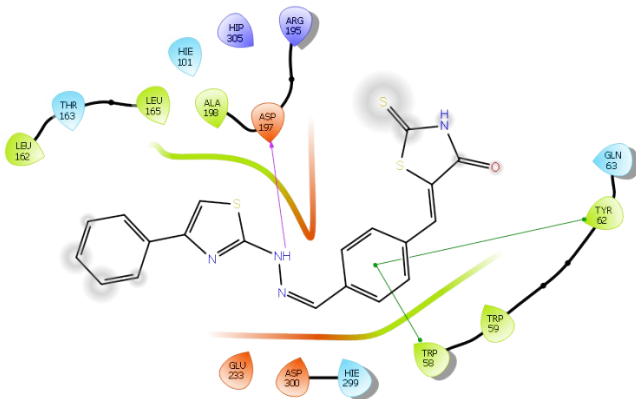

7b

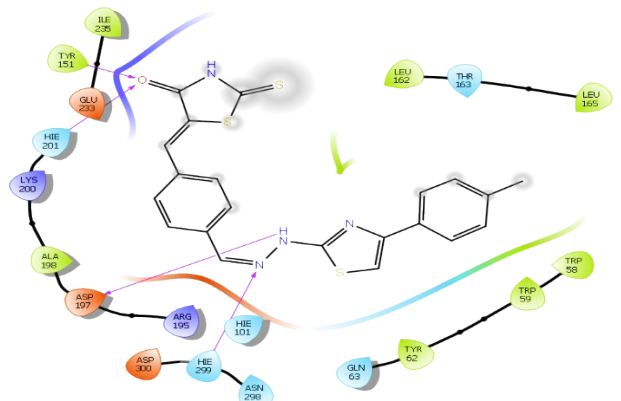

7c

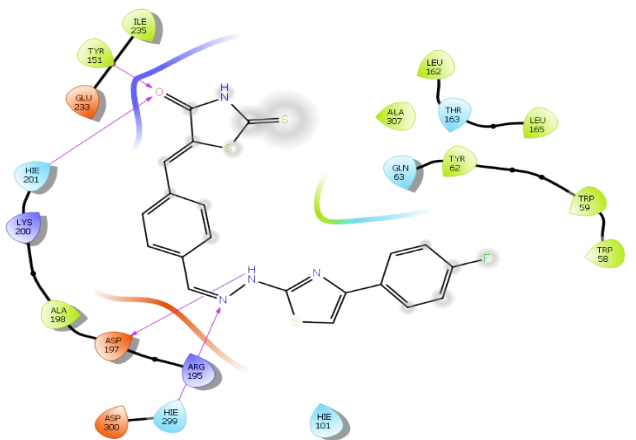

7d

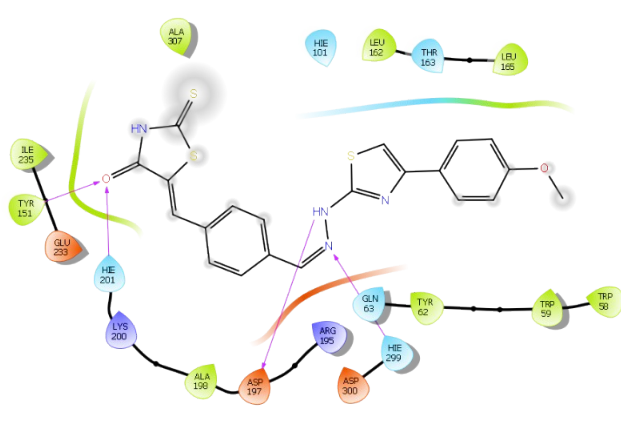

7g

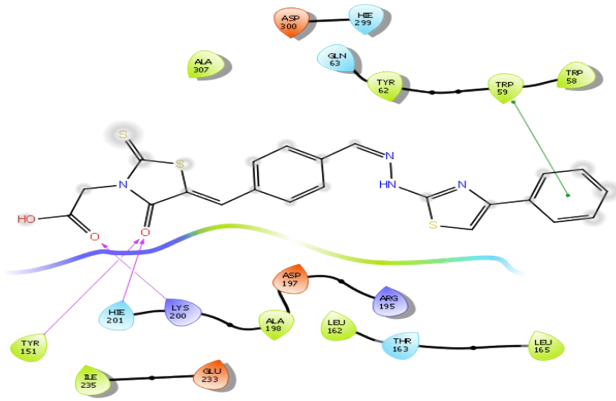

7h

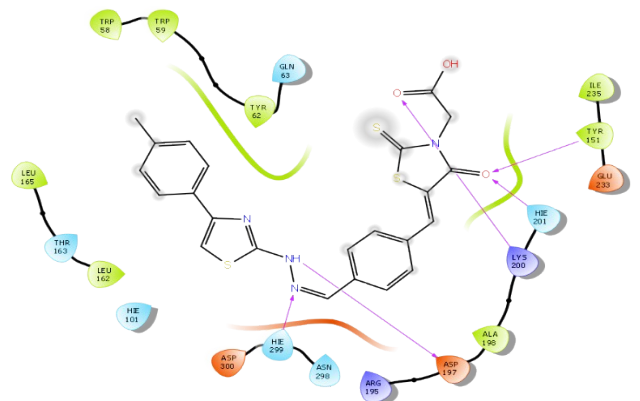

7i

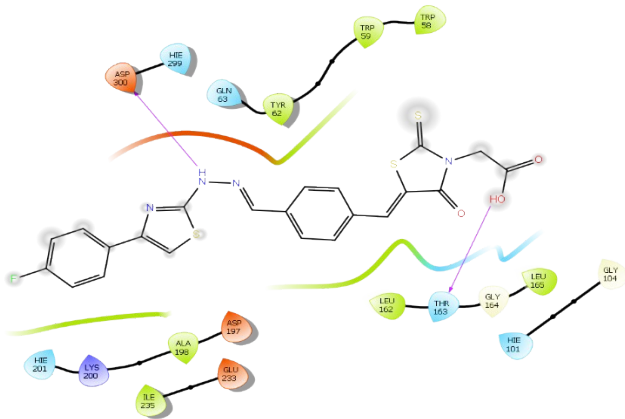

7j

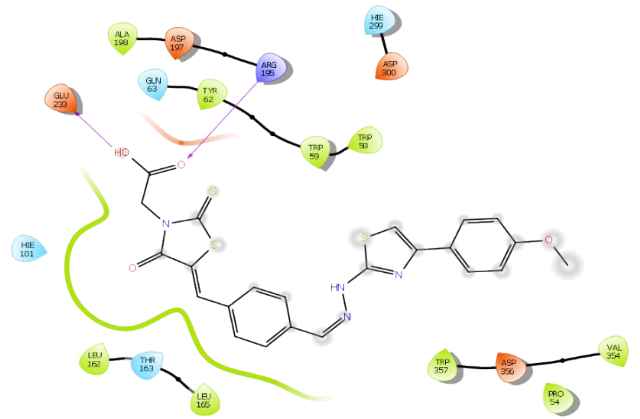

7k

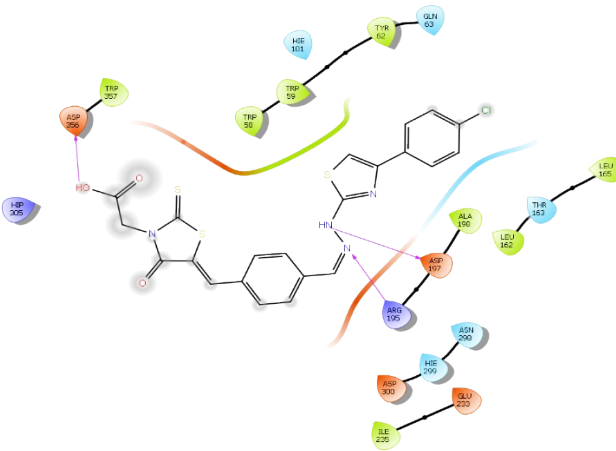

7l

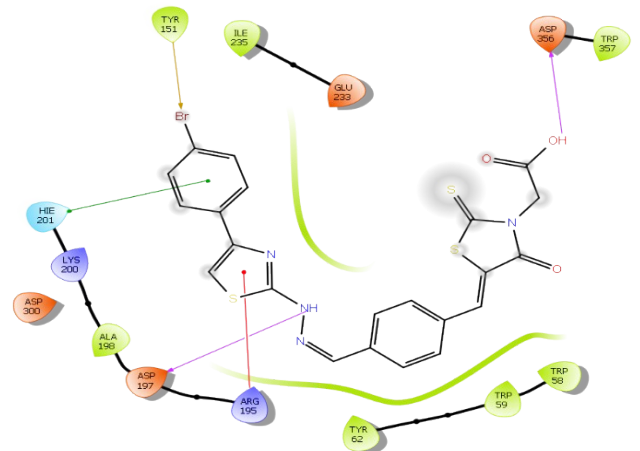

Figure S5: 2D binding orientation of synthesized derivatives in  $\alpha$ -amylase binding pocket (PDB ID: 4W93).

**7a**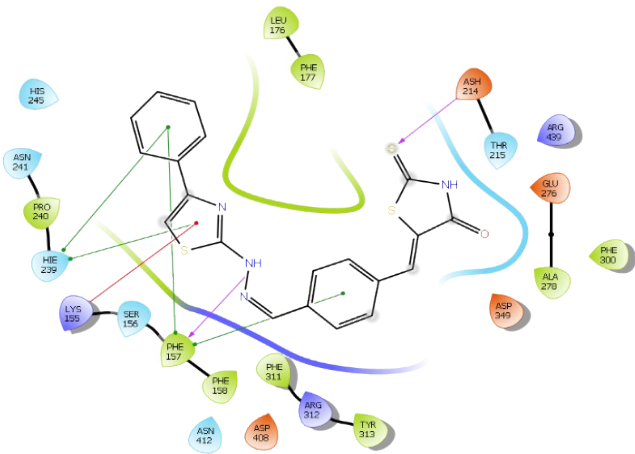**7b**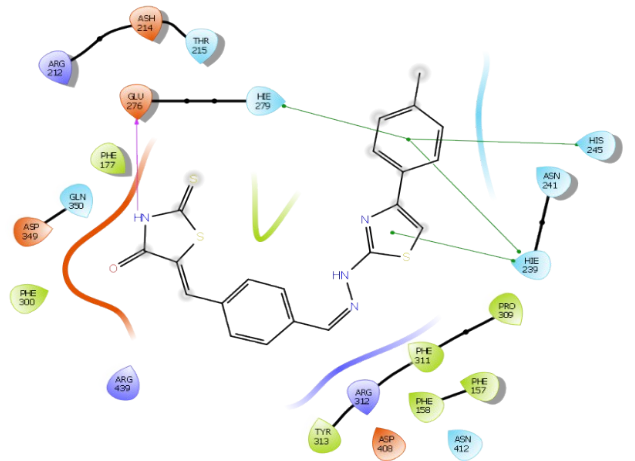**7c**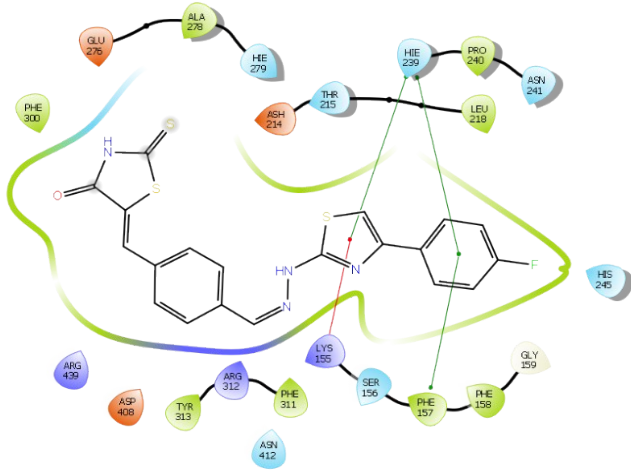**7d**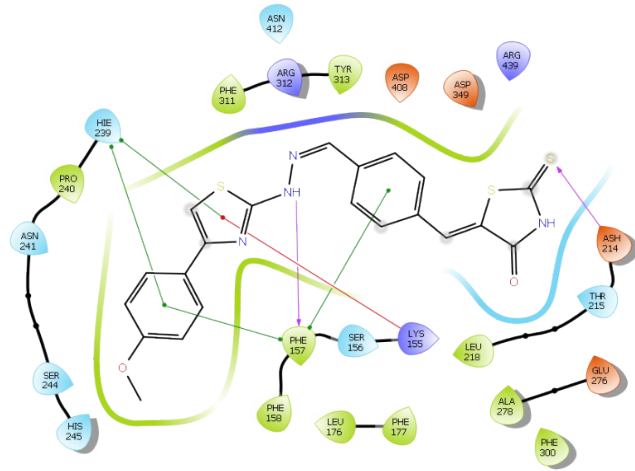**7e**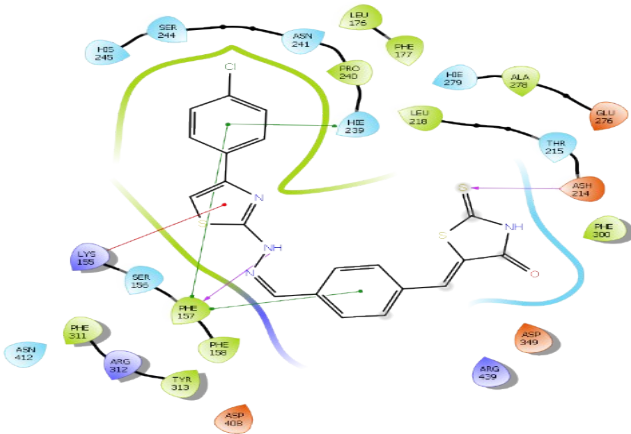**7f**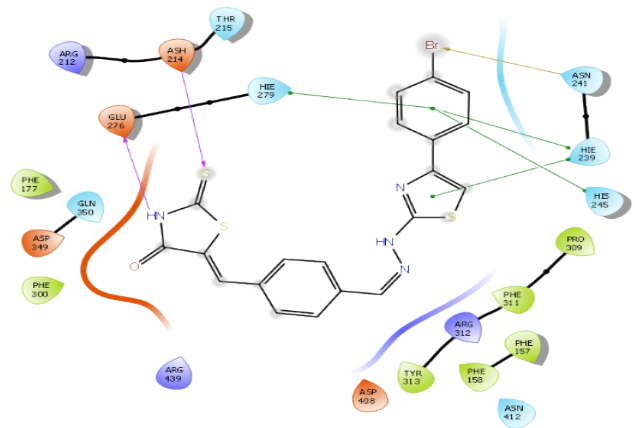

7h

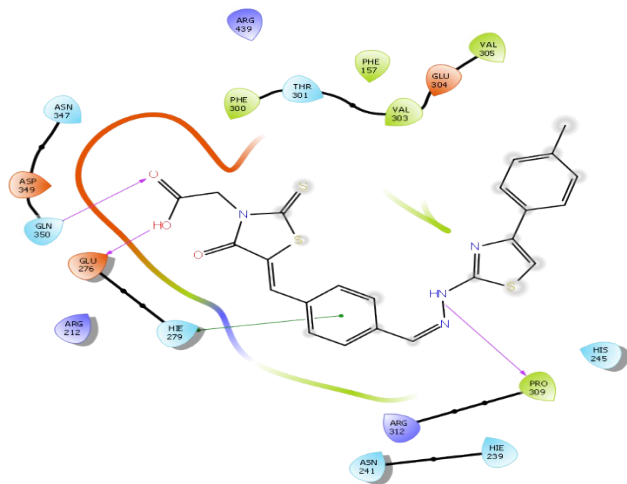

7i

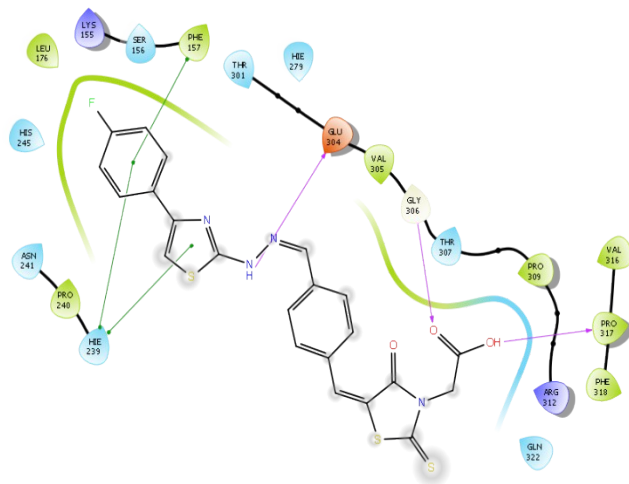

7j

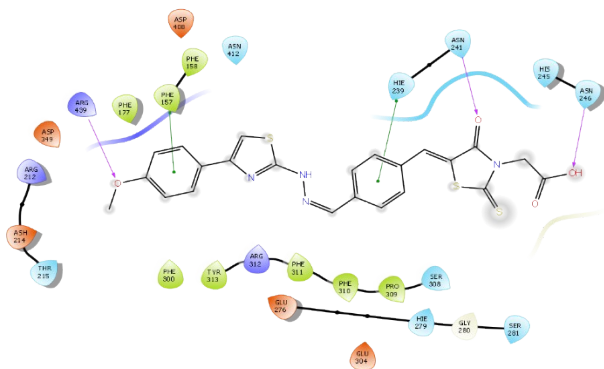

7l

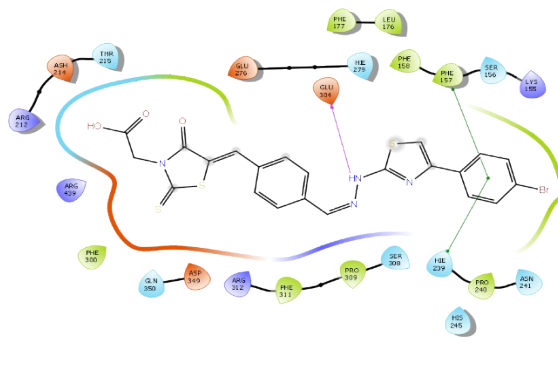

Figure S6: 2D binding orientation of synthesized derivatives in  $\alpha$ -glucosidase binding pocket (PDB ID: 3A47).

7a

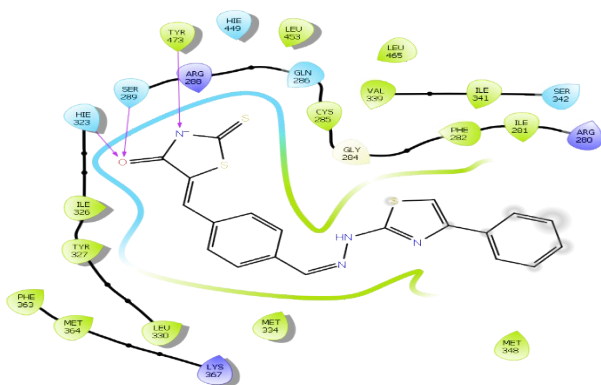

7b

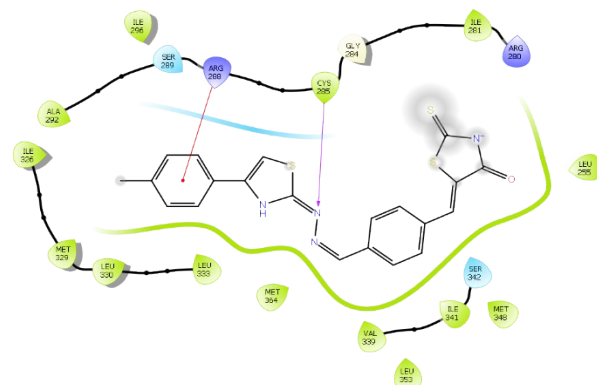

7c

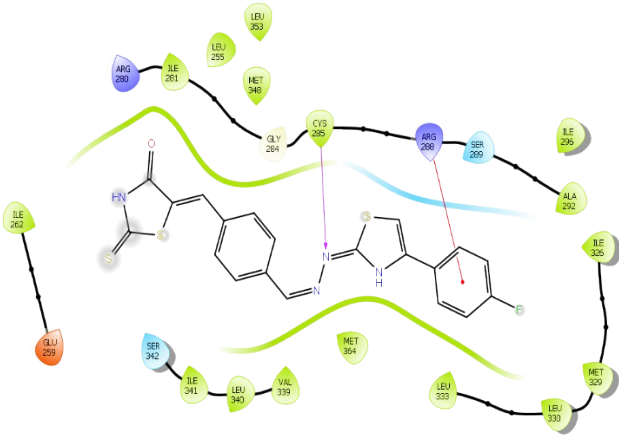

7d

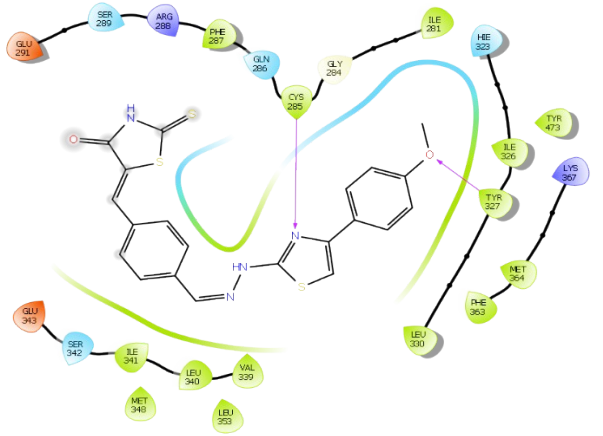

7g

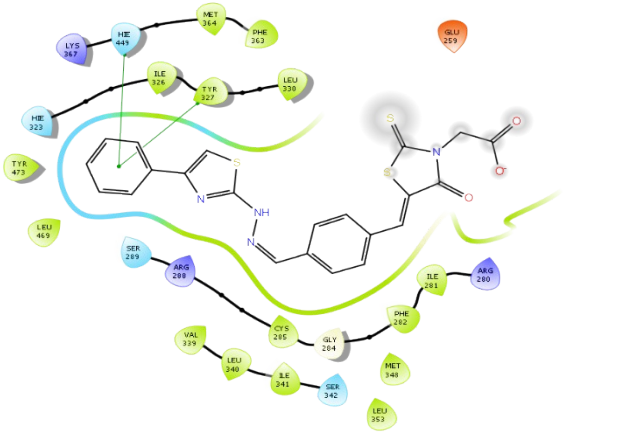

7h

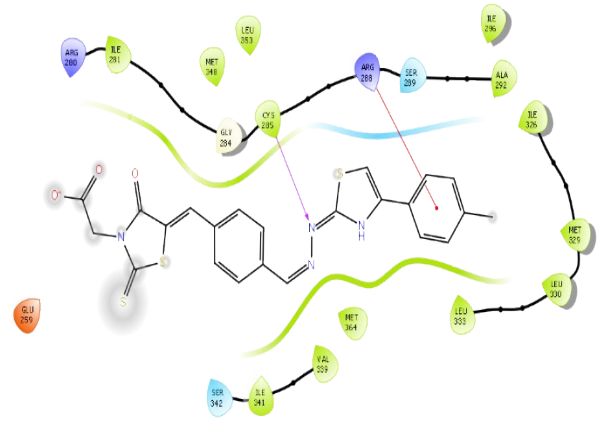

7i

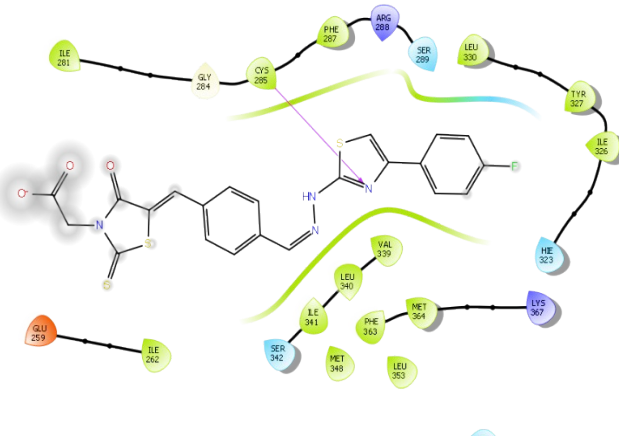

7j

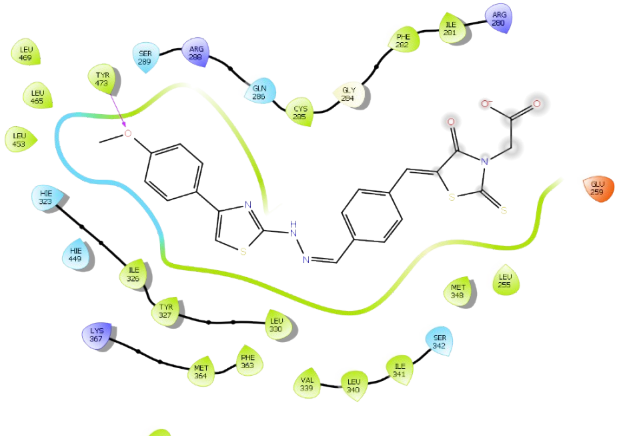

7k

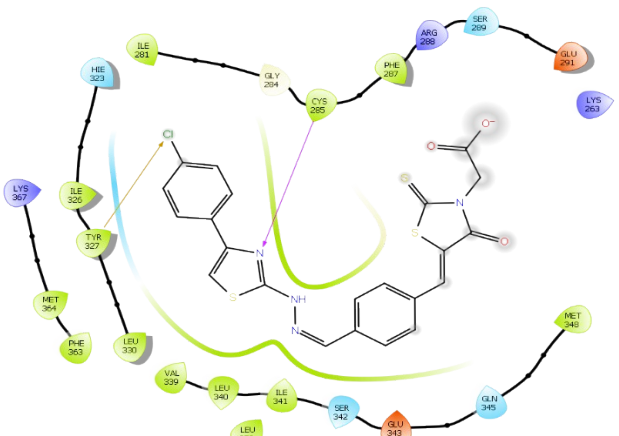

7l

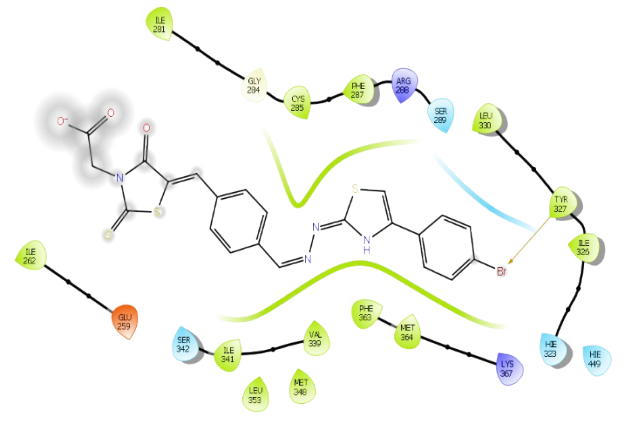

Figure S7: 2D binding orientation of synthesized derivatives in PPAR-gamma binding pocket (PDB ID: 5Y2O).

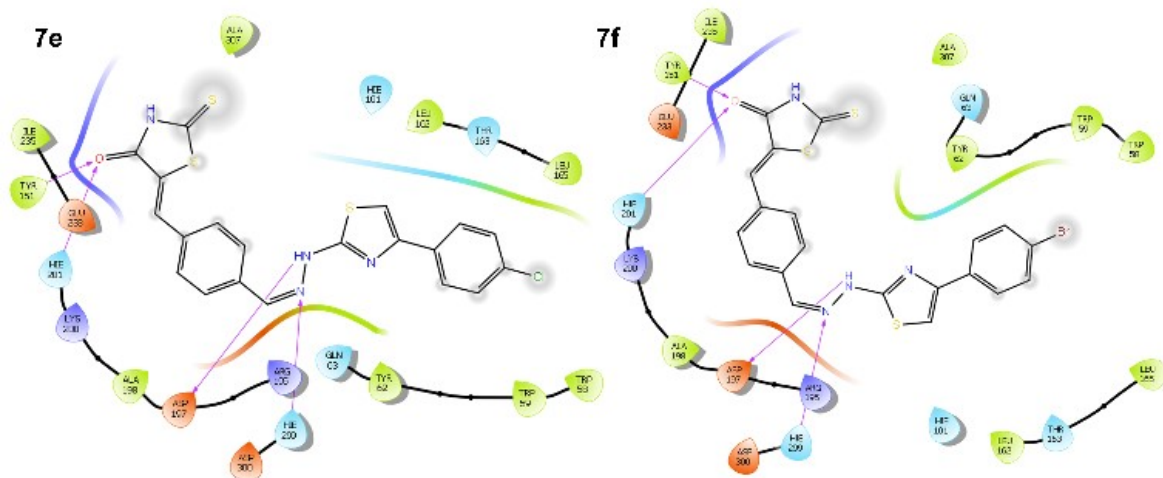

Fig. S8. 2D binding orientation of 7e and 7f in  $\alpha$ -amylase binding pocket (PDB ID: 4W93).

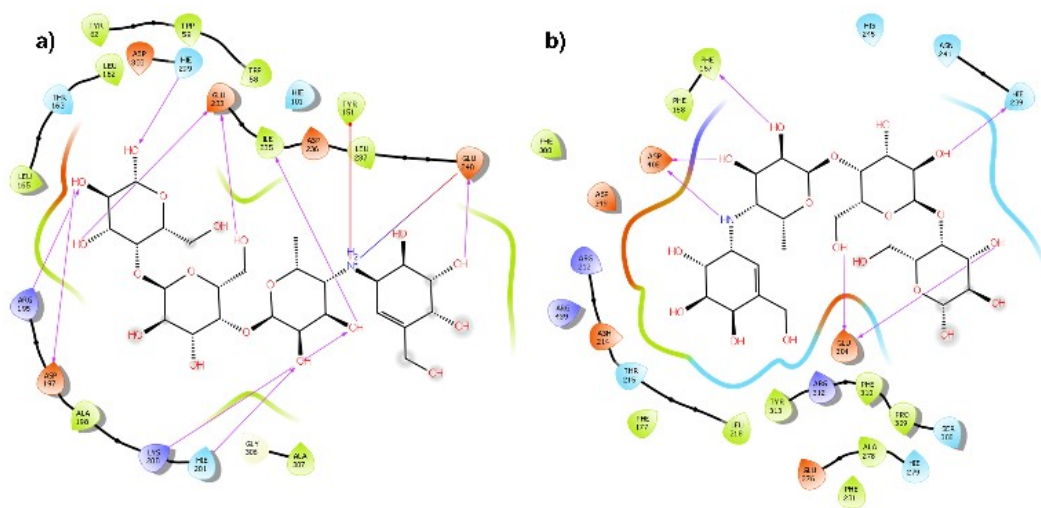

Fig. S9. 2D binding orientation of acarbose in a)  $\alpha$ -amylase, b)  $\alpha$ -glucosidase binding pocket.

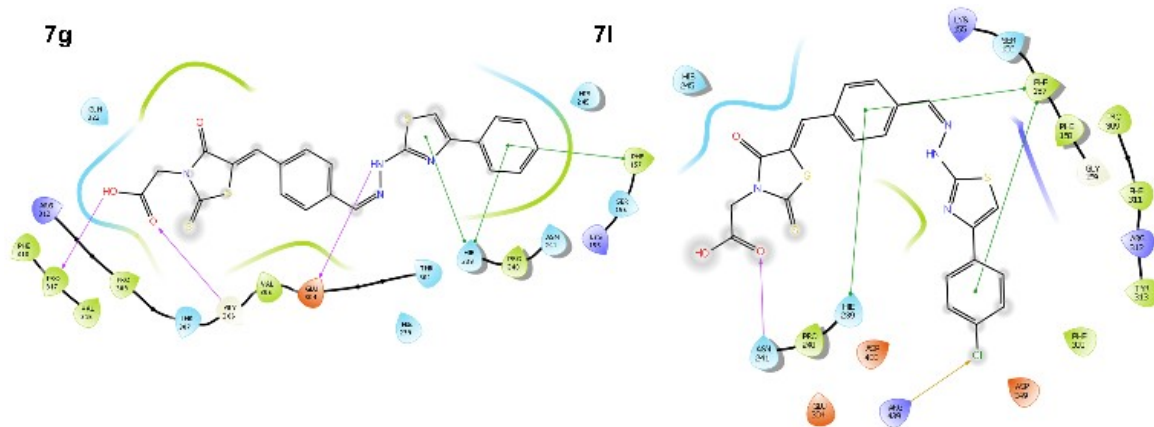

Fig. S10. 2D binding orientation of 7g and 7l in  $\alpha$ -glucosidase binding pocket (PDB ID: 3A47).

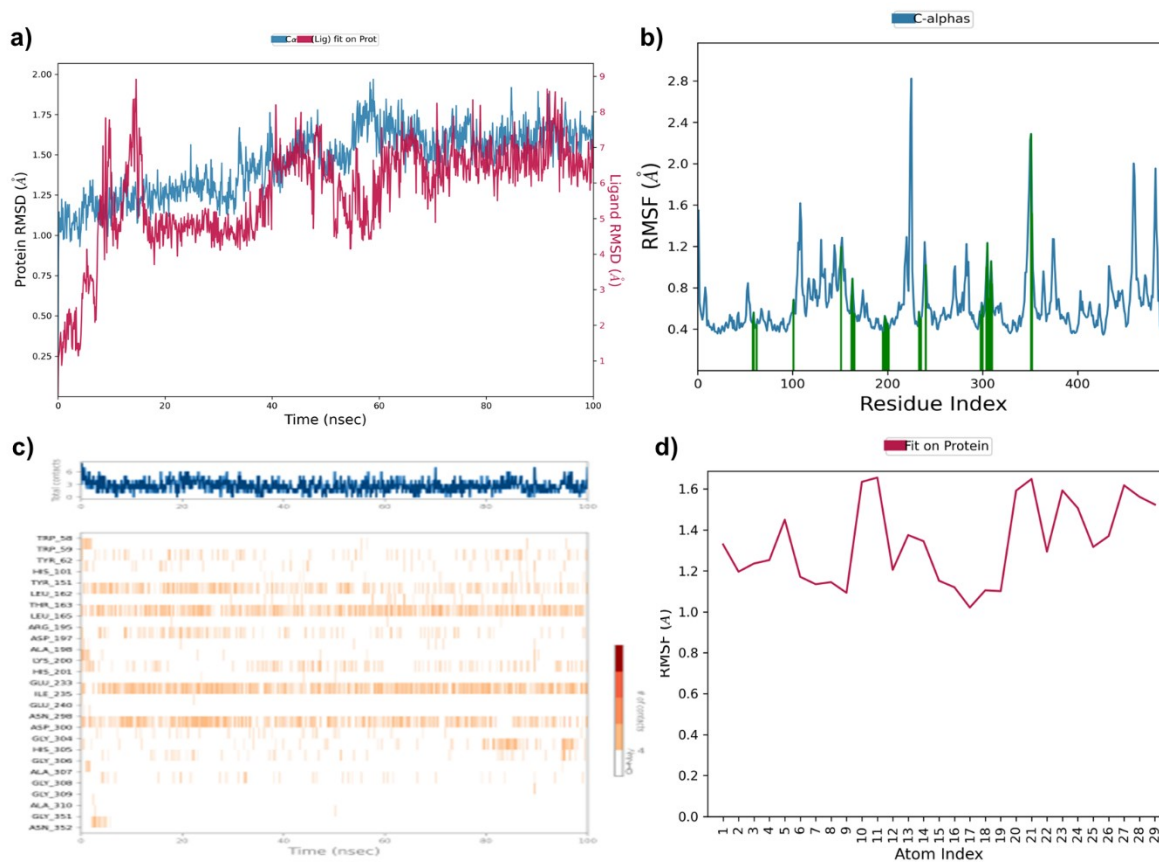

Figure S11. (a) Protein Ligand RMSD Plot of 7e, (b) Protein RMSF Plot, (c) Protein Ligand Contacts timeline, (d) Ligand RMSF plot over period of 100 ns within  $\alpha$ -amylase protein



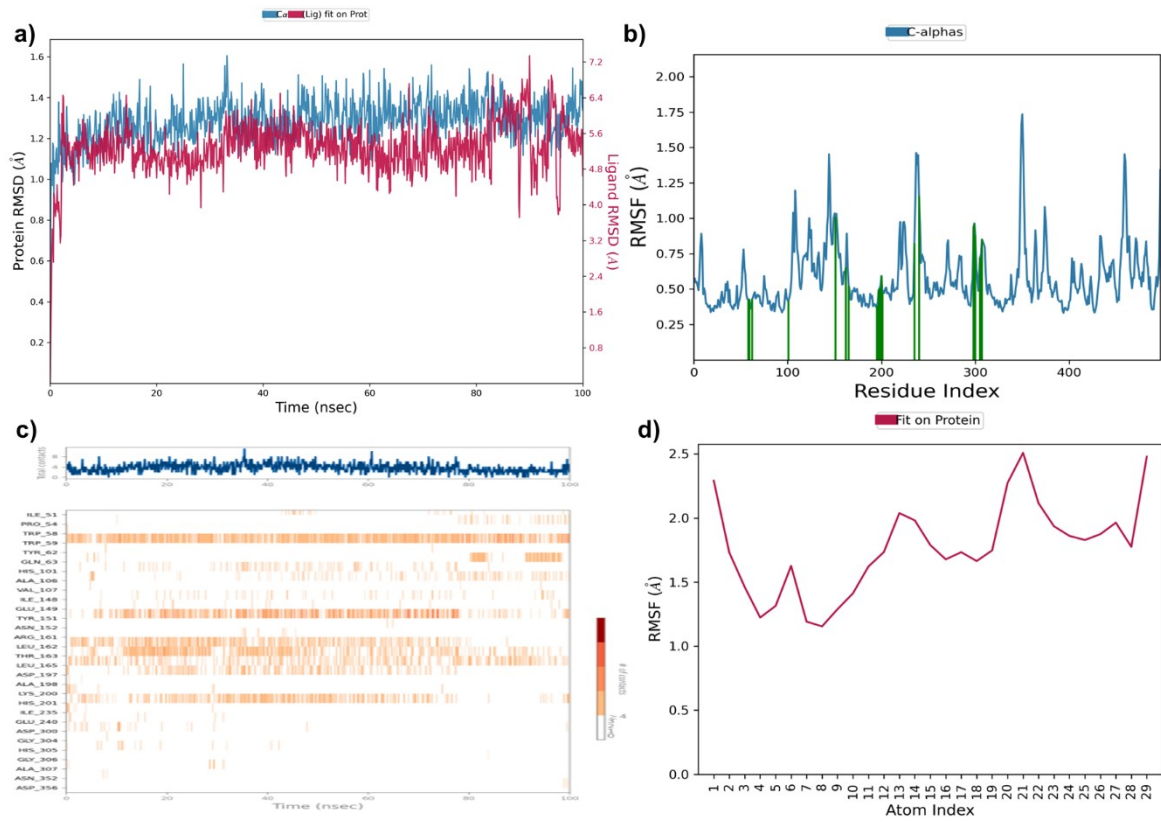

**Figure S12. (a) Protein Ligand RMSD Plot of 7f, (b) Protein RMSF Plot, (c) Protein Ligand Contacts timeline, (d) Ligand RMSF plot over period of 100 ns within  $\alpha$ -amylase protein**

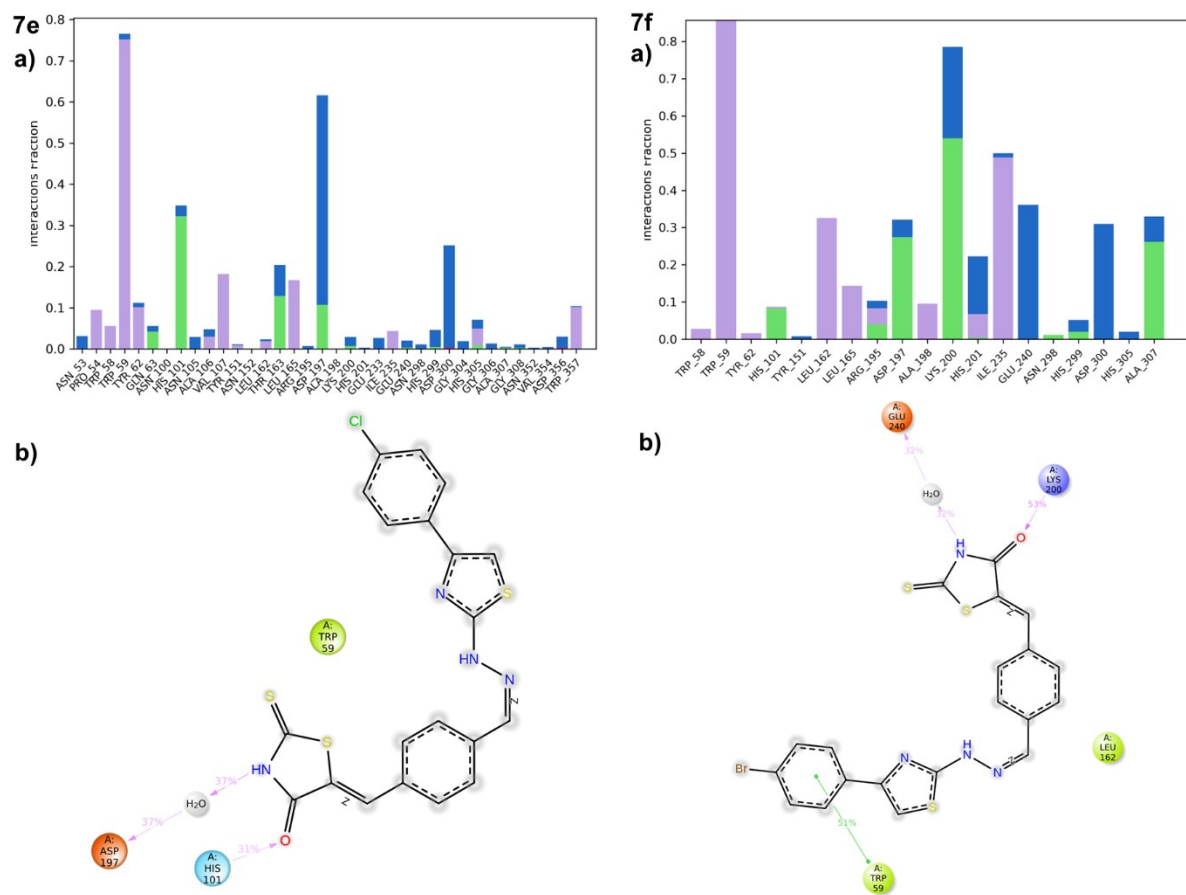

Figure S13. a) Protein ligand contacts of compound **7e** and **7f** with the respective amino acids of the protein  
(b) Ligand protein contacts of **7e** and **7f** with the respective amino acids of the  $\alpha$ -amylase protein.

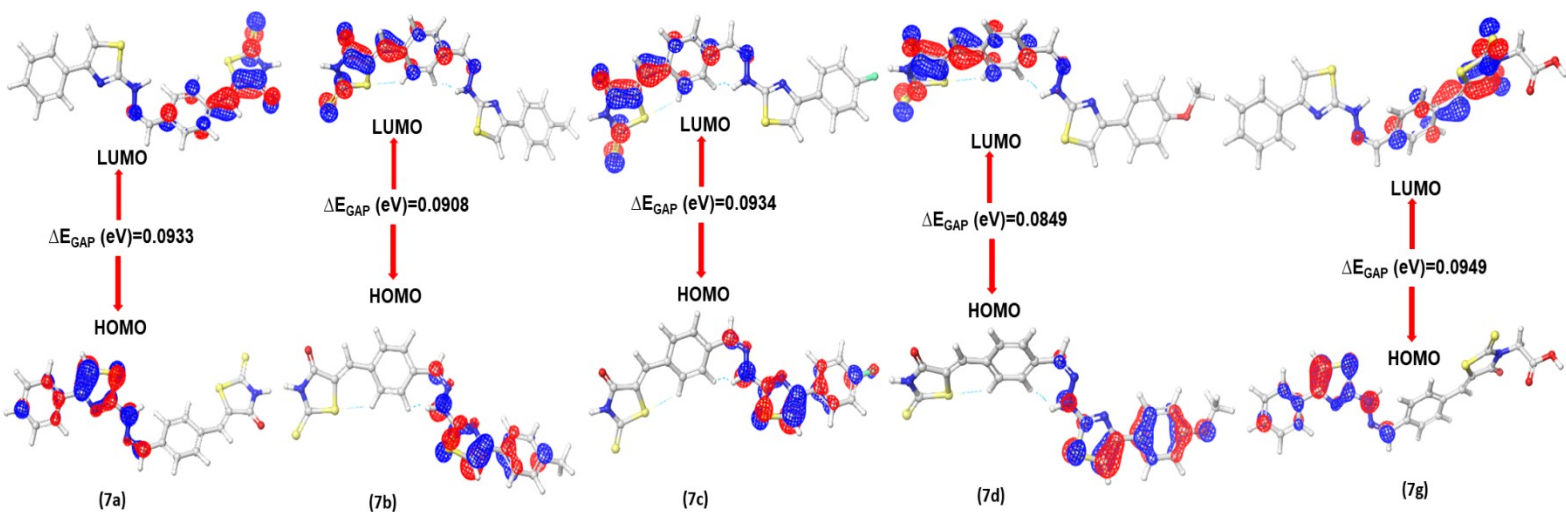

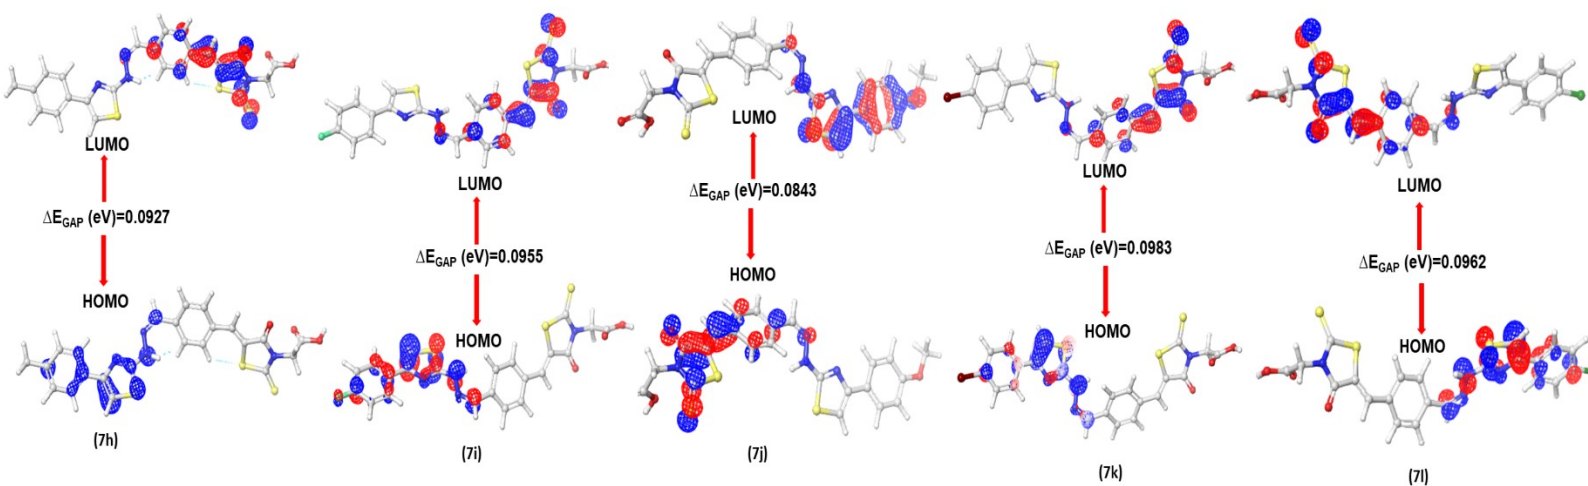

Figure S14. Contours of HOMO and LUMO of synthesized compounds

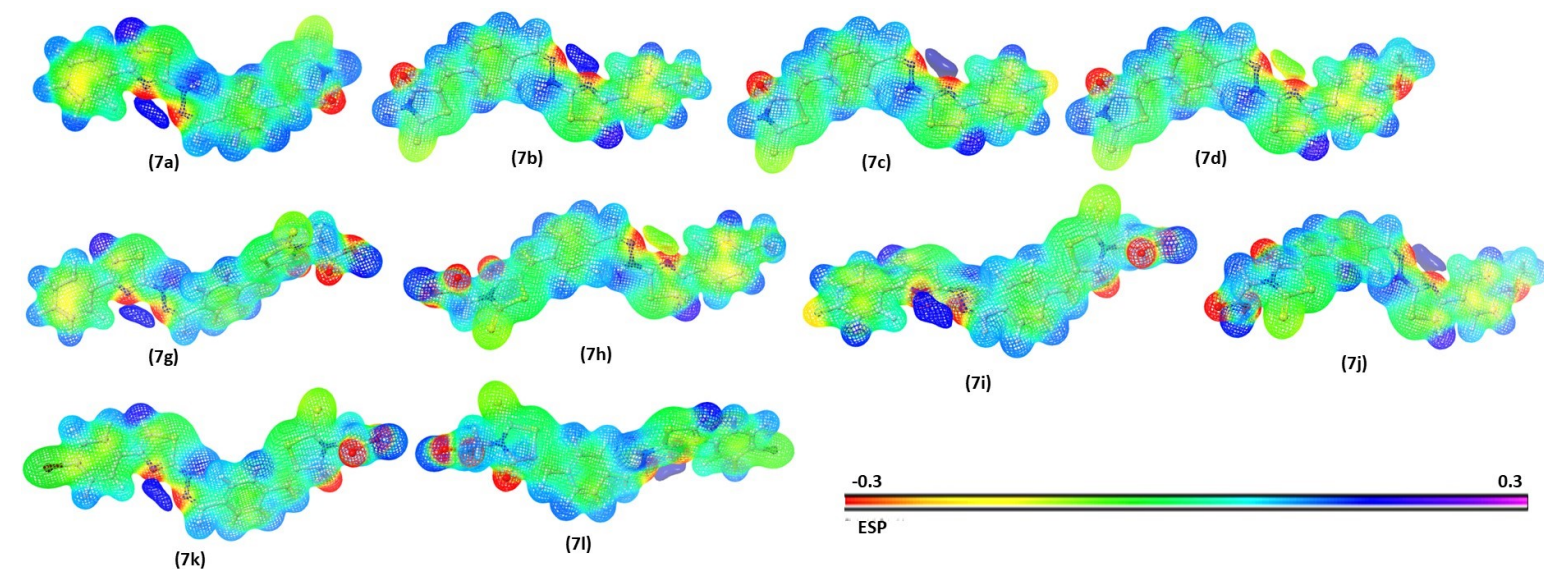

Figure S15. MEP map of synthesized compounds

**table. S9: Pharmacokinetic prediction:**

In the Qikprop module of Schrodinger's, the synthetic derivatives (**7a-l**) were predicted for the ADME prediction. The development of the pharmacokinetic profile of synthetic derivatives as bioactives depends heavily on adsorption, distribution, metabolism, and excretion.

**QPP MDCK:** apparent MDCK permeability (nm/sec) (<25 poor, >500 great).

**QPlog Kh<sub>sa</sub>:** prediction of binding to human serum albumin (-1.5 to 1.5).

**QPlog BB:** predicted brain/blood partition coefficient (-3.0 to 1.2).

**QPlogPo/w:** octanol/water partition coefficient (<5).

**QPlogS:** Aqueous solubility (-6.5 to 0.5).

**QPlogHERG:** IC<sub>50</sub> value for blockage of HERG K<sup>+</sup> channels (<5).

**QPPCaco:** apparent Caco-2 permeability (nm/sec) (<25 poor, >500 great).

**PSA:** Polar surface area (7-200).

**HOA:** Percent human oral absorption (>80% is high <25% is poor).

**CNS:** Predicted central nervous system activity (-2.0 to + 2.0).

**ROF:** Rule of five violations (<1).

**ROT:** Rule of three violations (<1)

**SASA:** Solvent accessible surface area

| <b>QikProp<br/>Parameters</b> | <b>QPlog<br/>Po/W</b> | <b>QP<br/>logS</b> | <b>PSA</b> | <b>QPlog<br/>HERG</b> | <b>QPP<br/>Caco</b> | <b>QPP<br/>MDCK</b> | <b>QP log<br/>Khsa</b> | <b>QPlog<br/>BB</b> | <b>HOA</b> | <b>CNS</b> | <b>RoF</b> | <b>RoT</b> | <b>SASA</b> | <b>HBA</b> | <b>HBD</b> |
|-------------------------------|-----------------------|--------------------|------------|-----------------------|---------------------|---------------------|------------------------|---------------------|------------|------------|------------|------------|-------------|------------|------------|
| <b>7a</b>                     | 4.4                   | -6.3               | 87.0       | -6.89                 | 954.4               | 3572.3              | 0.37                   | -0.5                | 1          | 0          | 0          | 1          | 703.9       | 3          | 2          |
| <b>7b</b>                     | 4.74                  | -6.9               | 87.0       | -6.7                  | 957.6               | 3590.7              | 0.5                    | -0.5                | 1          | 0          | 0          | 1          | 736.3       | 3          | 2          |
| <b>7c</b>                     | 5.0                   | -7.2               | 87.0       | -6.8                  | 955.9               | 9494.4              | 0.5                    | -0.3                | 1          | 0          | 2          | 1          | 733.0       | 4          | 2          |
| <b>7d</b>                     | 4.53                  | -6.6               | 95.2       | -6.7                  | 952.6               | 3564.3              | 0.3                    | -0.6                | 1          | 0          | 0          | 1          | 741.1       | 4          | 2          |
| <b>7e</b>                     | 4.92                  | -7.1               | 87.0       | -6.7                  | 955.1               | 8819.1              | 0.4                    | -0.4                | 1          | 0          | 0          | 1          | 727.9       | 3          | 2          |
| <b>7f</b>                     | 4.67                  | -6.7               | 87.0       | -5.5                  | 954.5               | 6448.1              | 0.4                    | -0.4                | 1          | 0          | 0          | 1          | 712.8       | 3          | 2          |
| <b>7g</b>                     | 4.63                  | -6.8               | 122.5      | -5.4                  | 52.4                | 161.4               | 0.1                    | -1.6                | 1          | -2         | 0          | 1          | 792.4       | 5          | 2          |
| <b>7h</b>                     | 4.9                   | -7.3               | 122.5      | -5.4                  | 52.5                | 162.9               | 0.3                    | -1.6                | 1          | -2         | 0          | 1          | 825.7       | 5          | 2          |
| <b>7i</b>                     | 5.1                   | -7.6               | 122.3      | -5.3                  | 52.4                | 428.0               | 0.2                    | -1.4                | 1          | -2         | 2          | 1          | 821.5       | 6          | 2          |
| <b>7j</b>                     | 4.7                   | -7.0               | 129.8      | -5.4                  | 55.7                | 171.6               | 0.1                    | -1.6                | 1          | -2         | 1          | 1          | 827.7       | 5          | 2          |
| <b>7k</b>                     | 5.0                   | -7.5               | 122.5      | -5.4                  | 52.4                | 398.1               | 0.2                    | -1.4                | 1          | -2         | 2          | 1          | 816.4       | 5          | 2          |
| <b>7l</b>                     | 4.8                   | -7.1               | 122.5      | -5.3                  | 52.4                | 291.3               | 0.2                    | -1.5                | 1          | -2         | 0          | 1          | 801.3       | 5          | 2          |

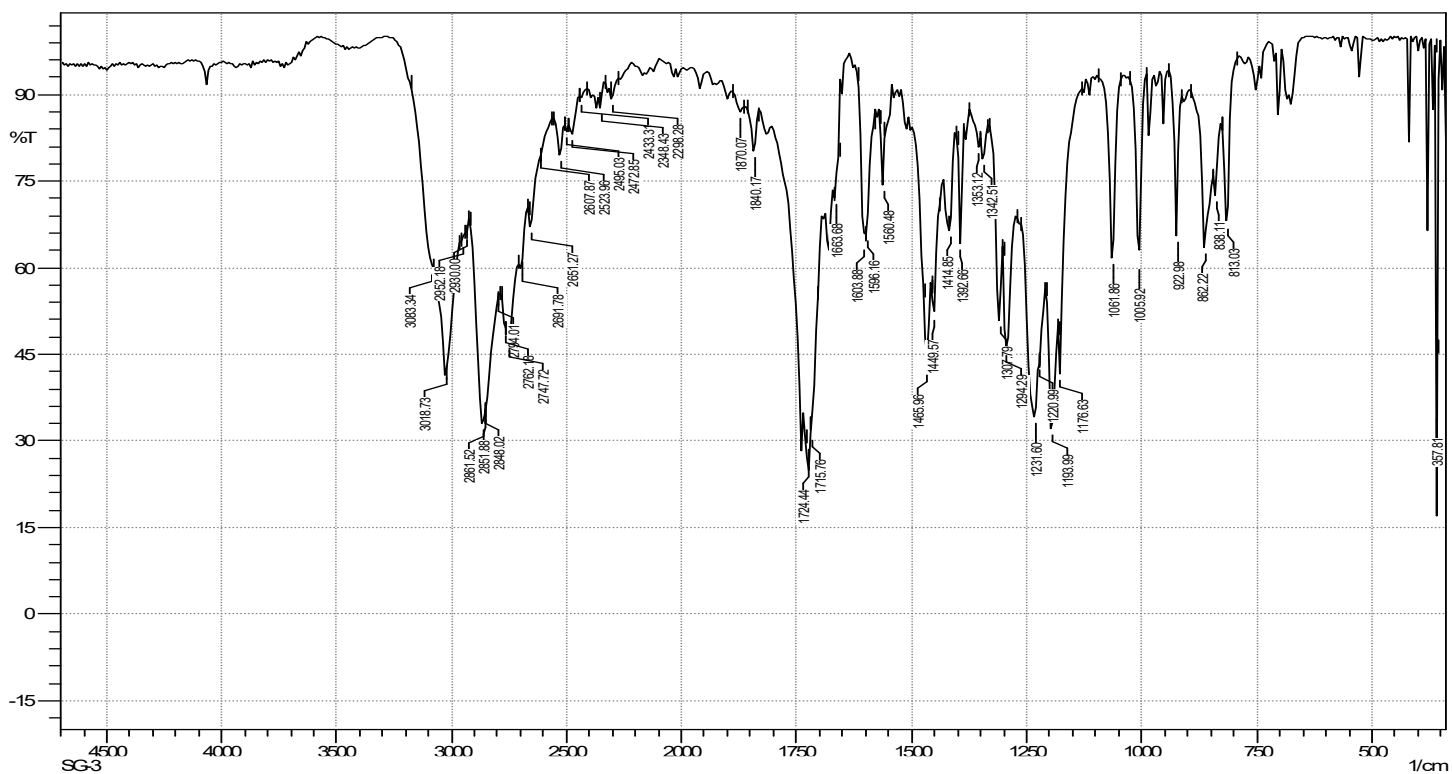

FTIR (KBr,  $\text{cm}^{-1}$ ) spectra of compound 3a

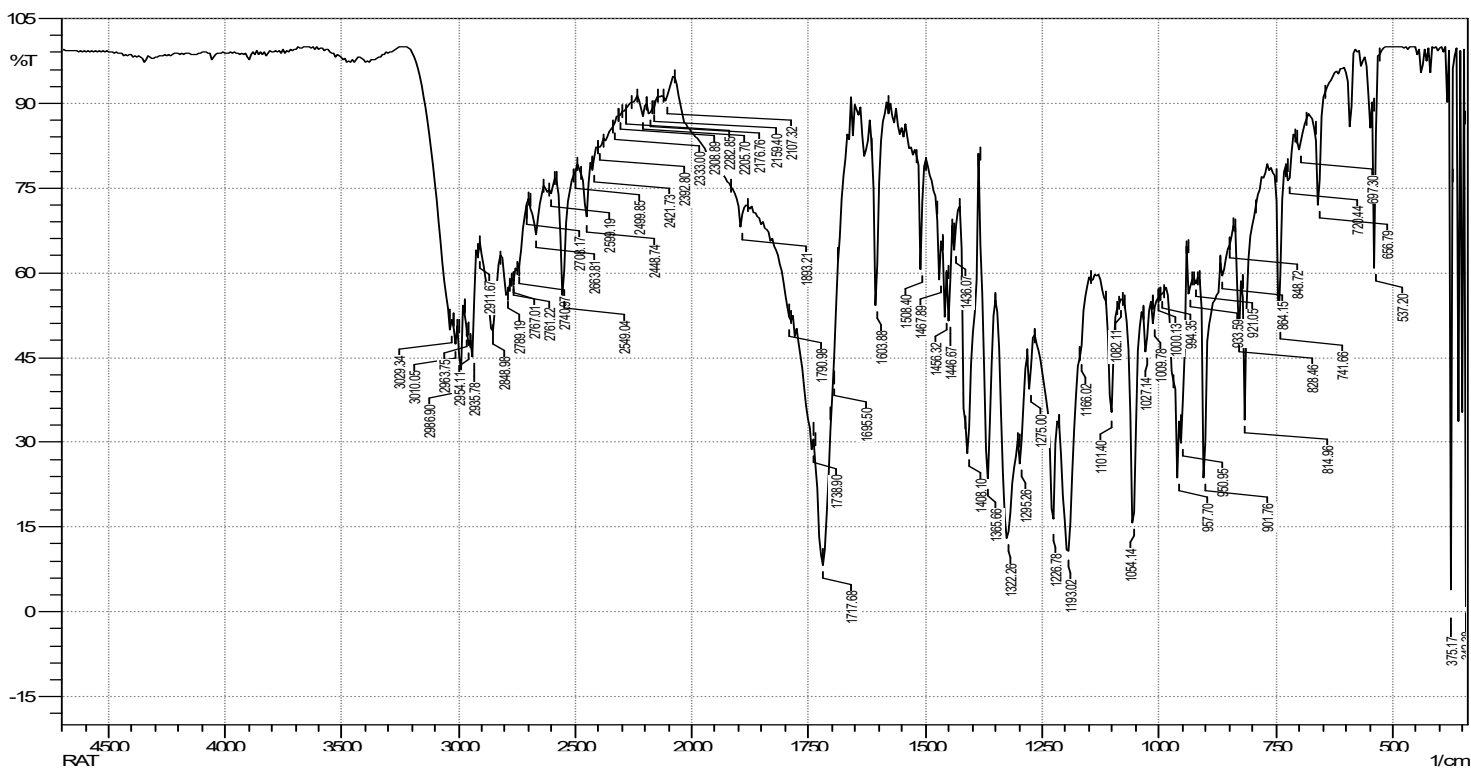

FTIR (KBr,  $\text{cm}^{-1}$ ) spectra of compound 3b

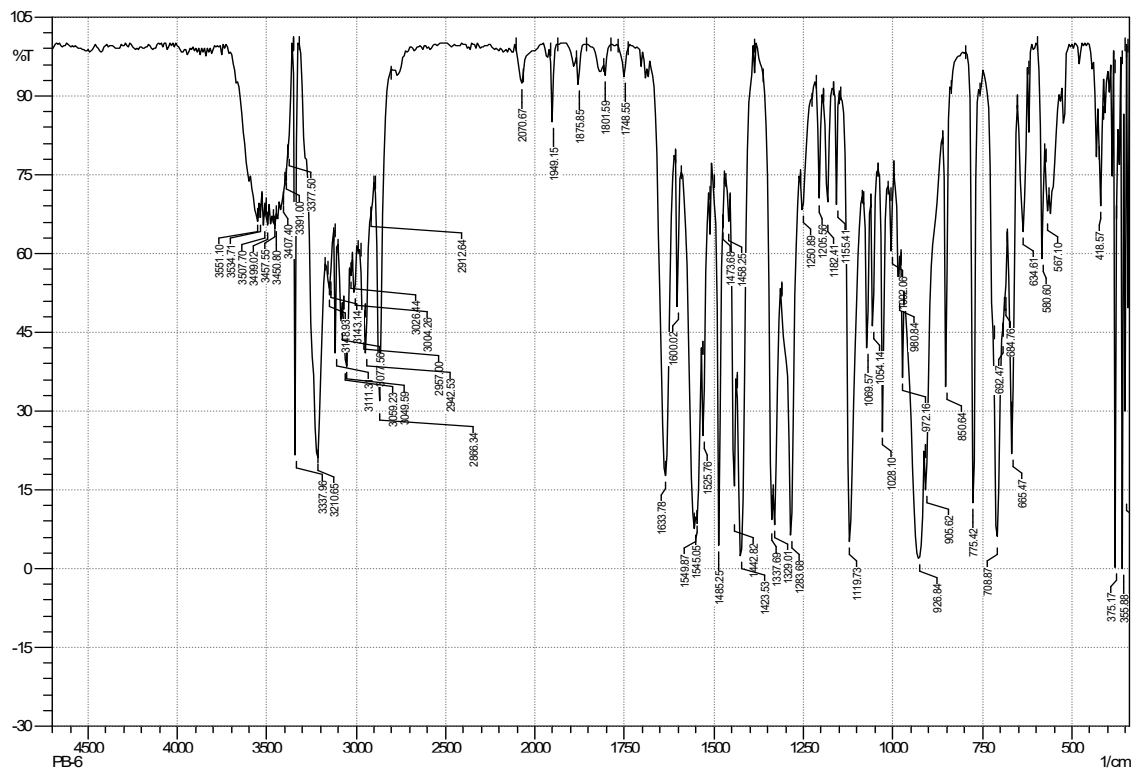

FTIR (KBr, cm<sup>-1</sup>) spectra of compound 6a

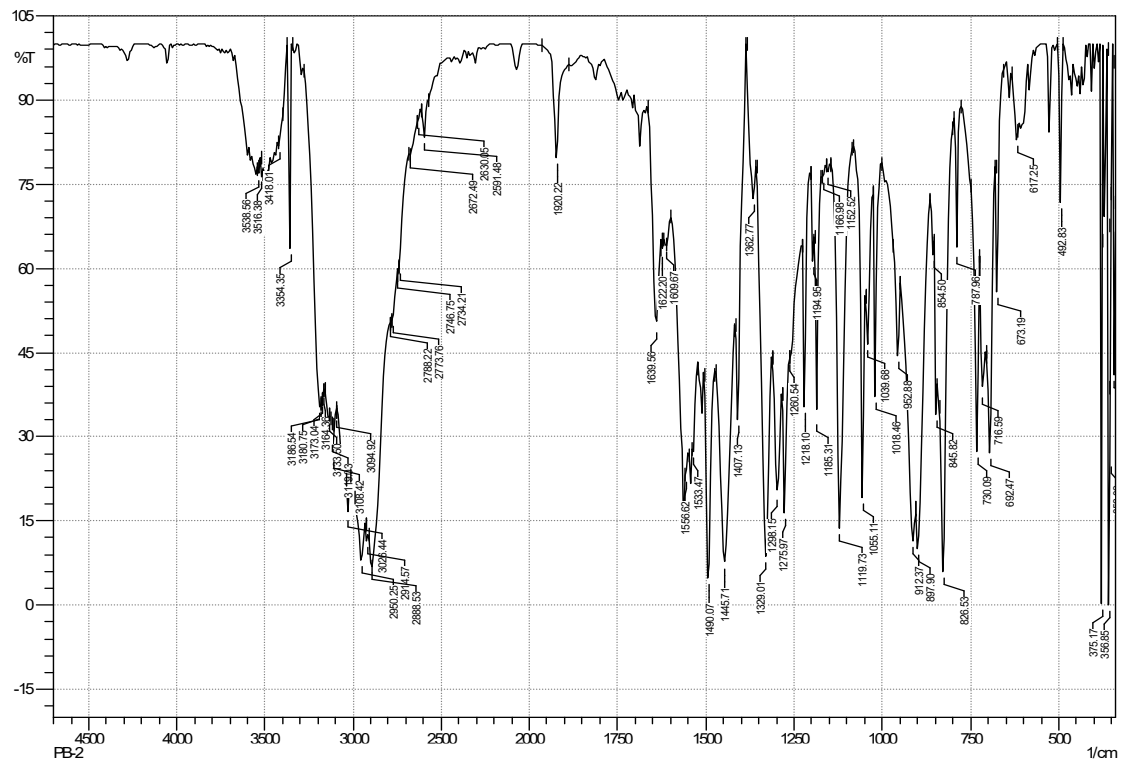

FTIR (KBr, cm<sup>-1</sup>) spectra of compound 6b

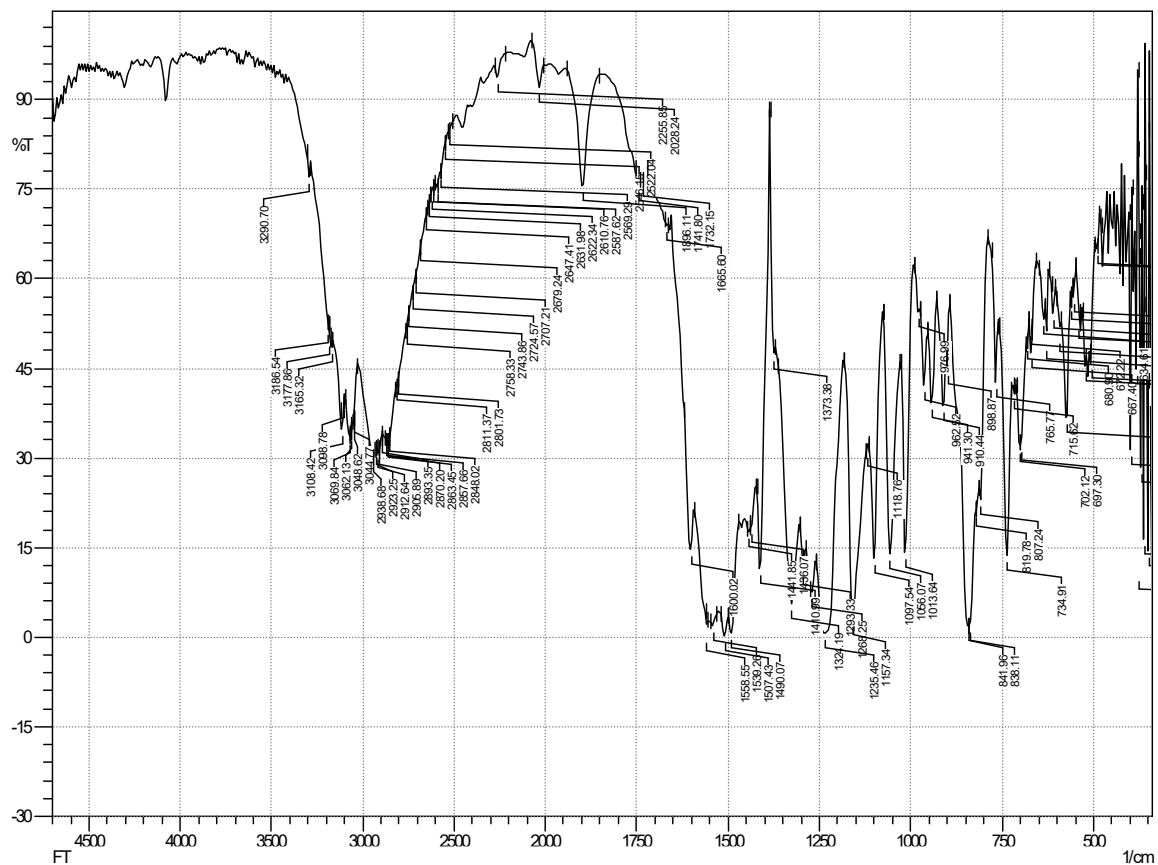

FTIR (KBr, cm<sup>-1</sup>) spectra of compound 6c

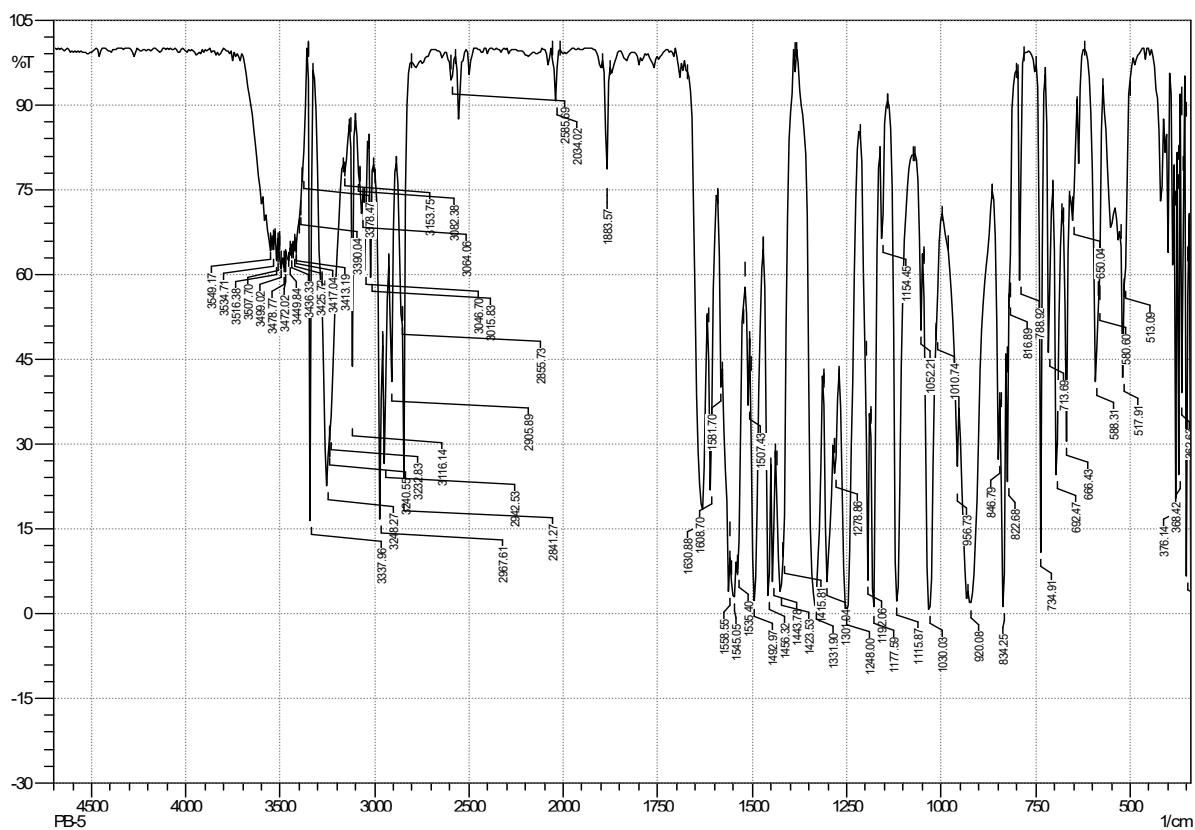

FTIR (KBr, cm<sup>-1</sup>) spectra of compound 6d



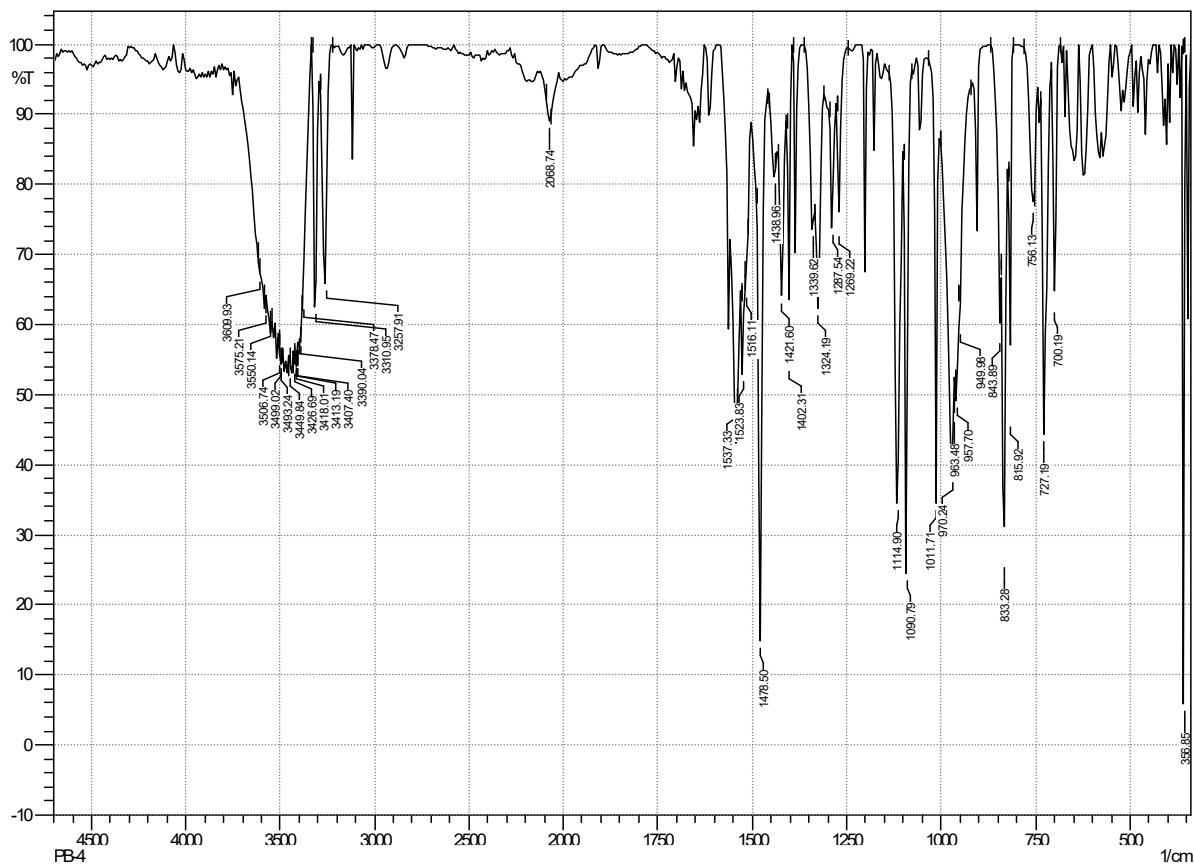

FTIR ( $\text{KBr}$ ,  $\text{cm}^{-1}$ ) spectra of compound 6e

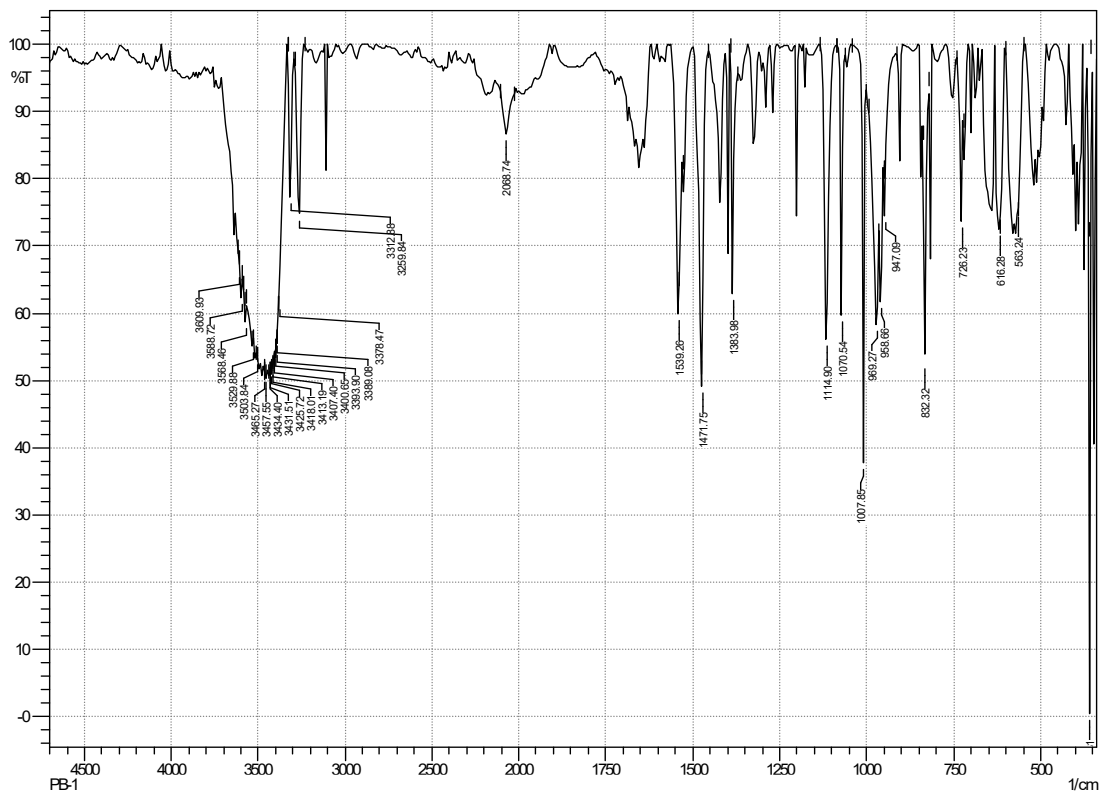

FTIR ( $\text{KBr}$ ,  $\text{cm}^{-1}$ ) spectra of compound 6f

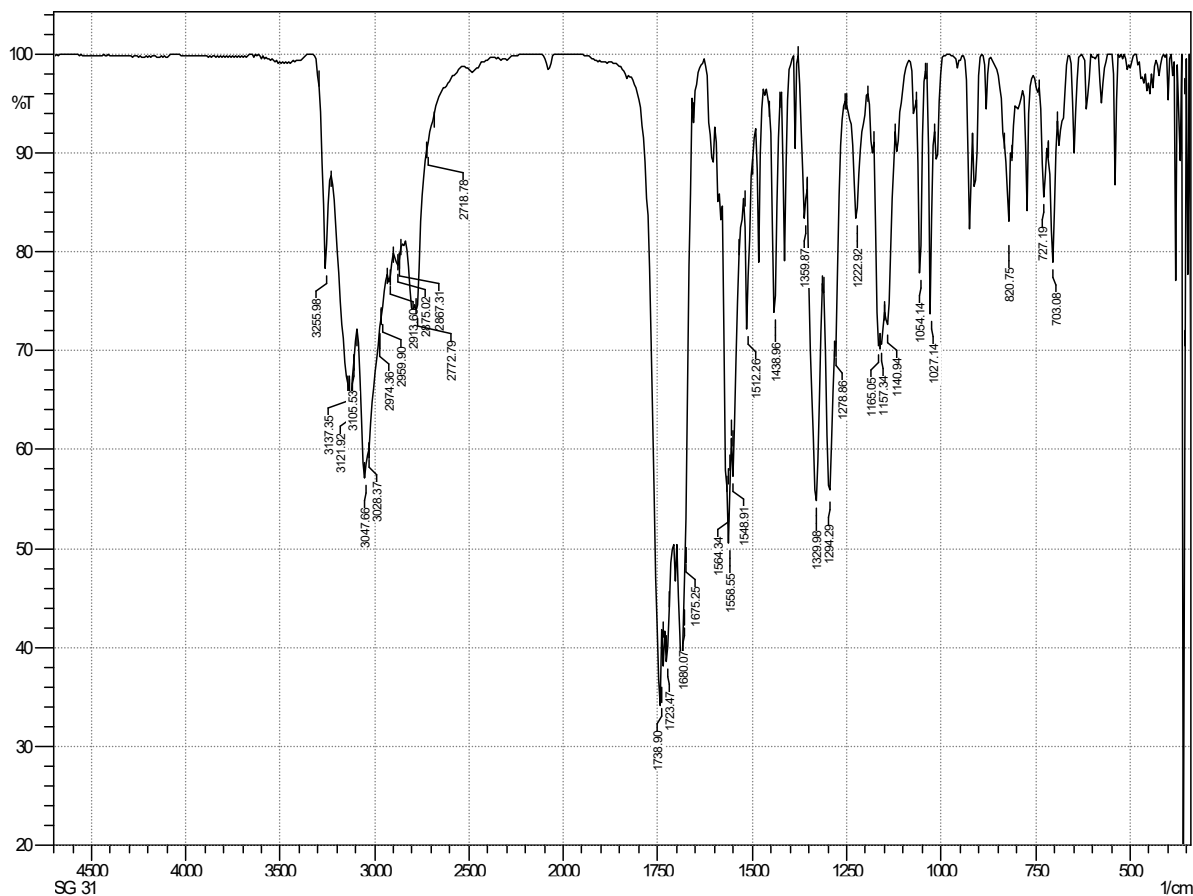

FTIR (KBr, cm<sup>-1</sup>) spectra of compound 7a

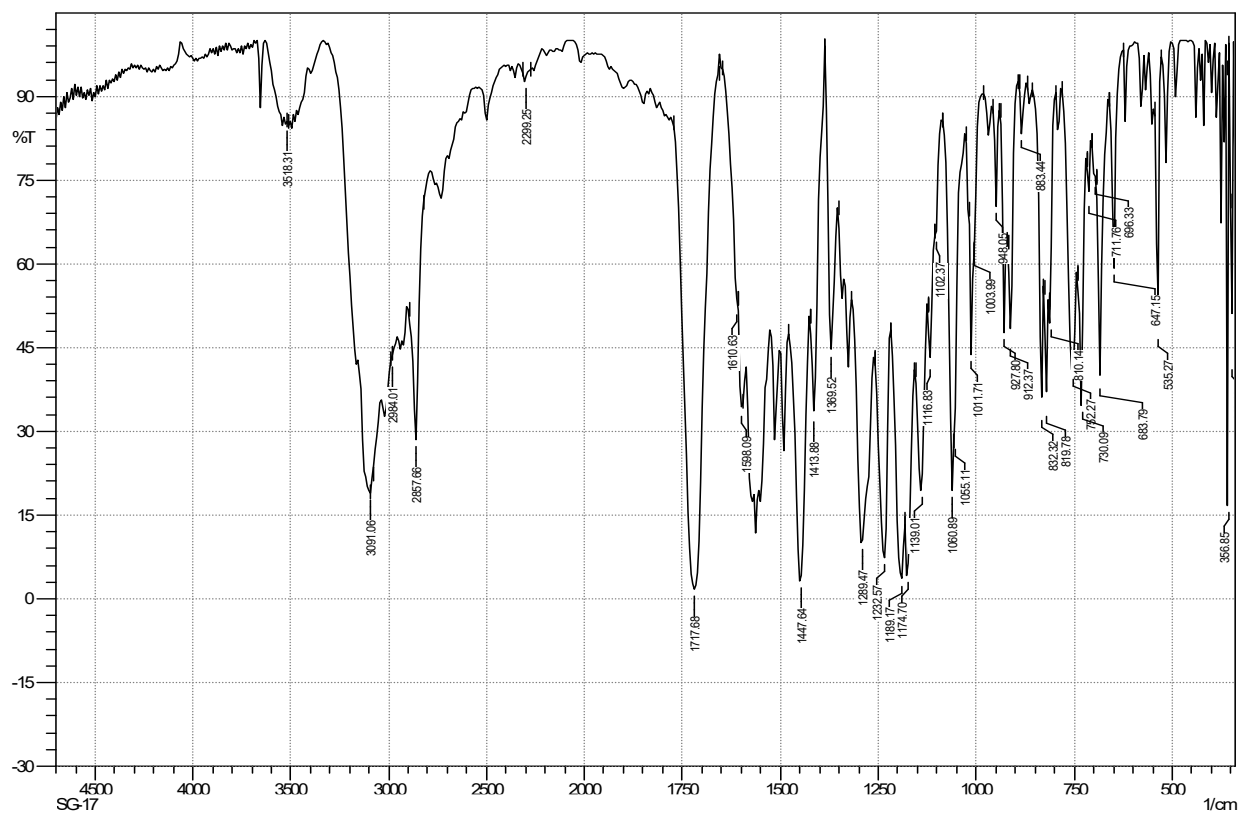

FTIR (KBr, cm<sup>-1</sup>) spectra of compound 7b

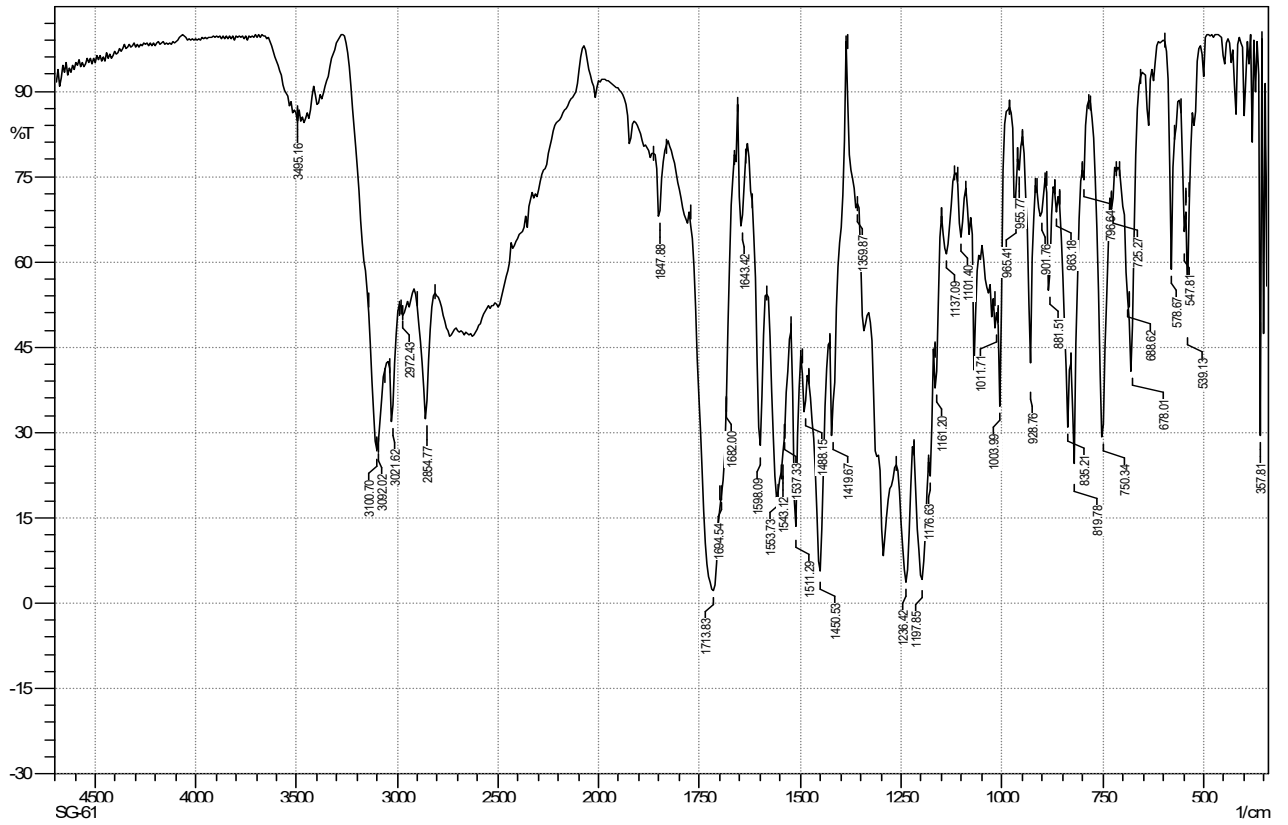

FTIR (KBr, cm<sup>-1</sup>) spectra of compound 7c

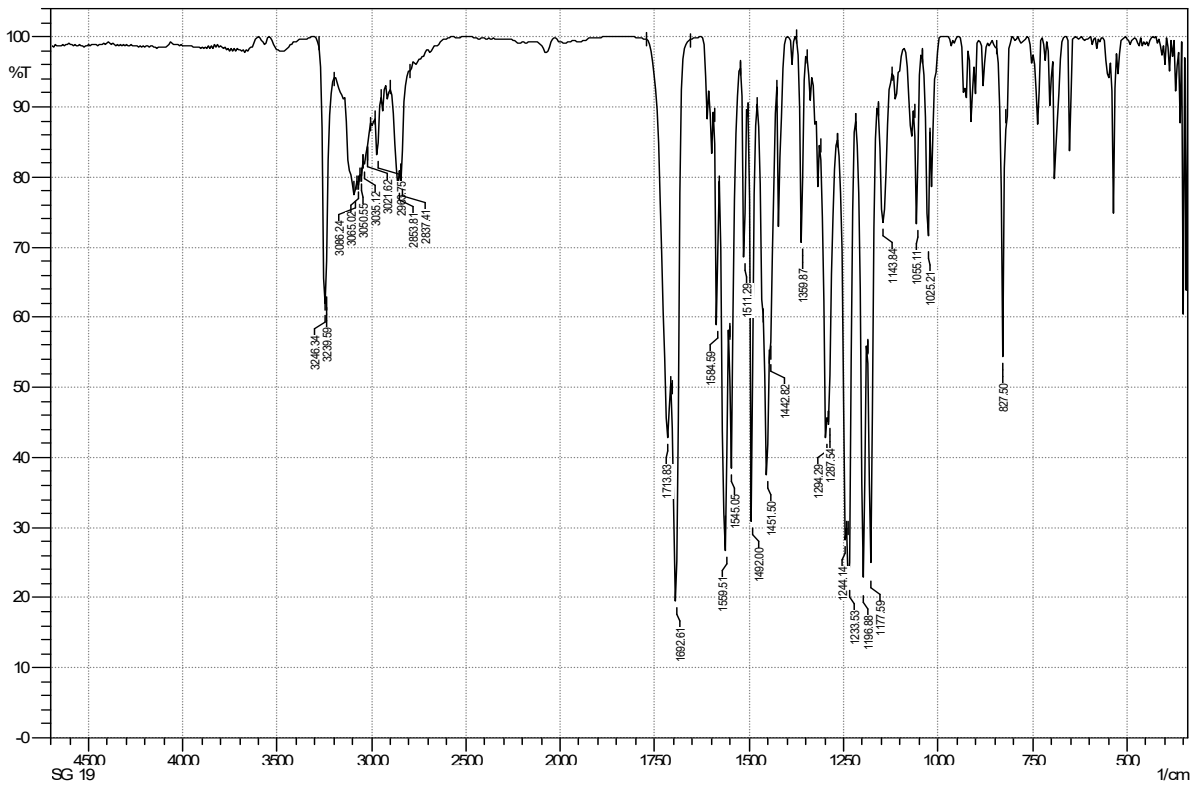

FTIR (KBr, cm<sup>-1</sup>) spectra of compound 7d

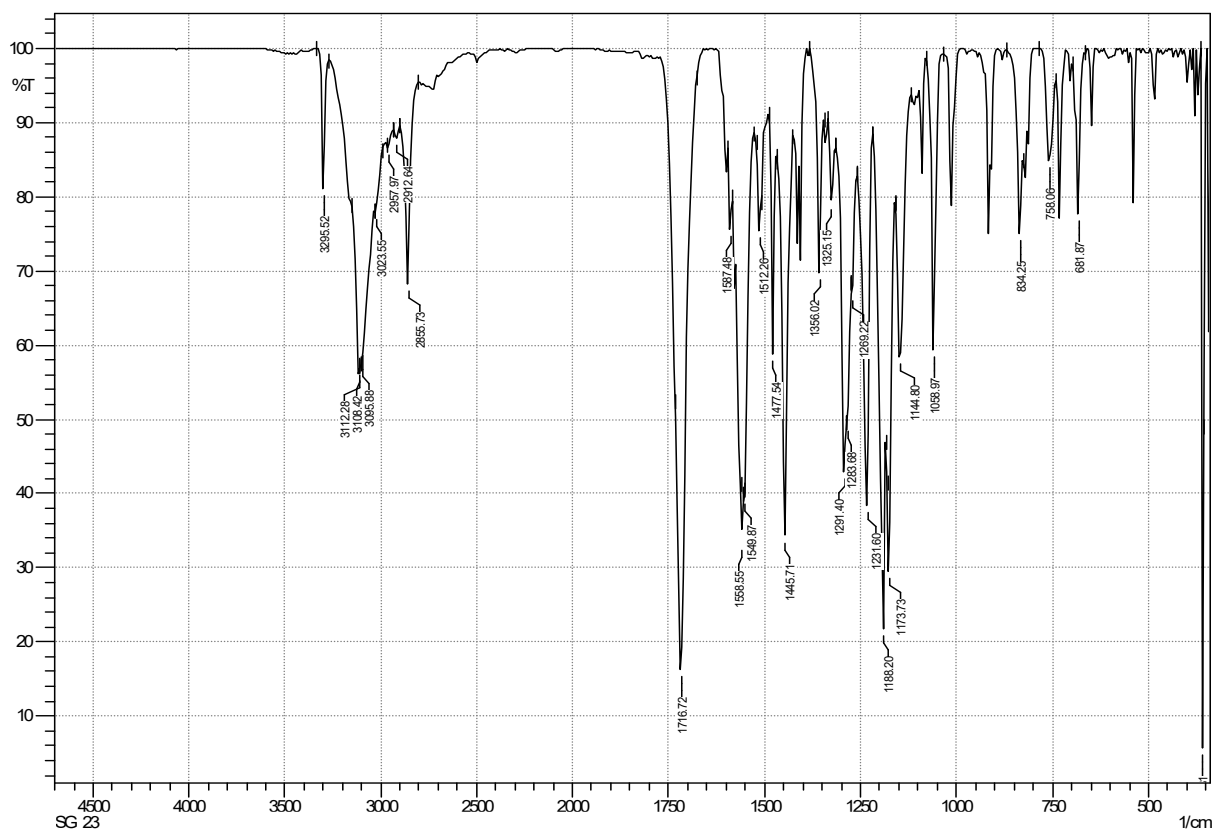

FTIR (KBr,  $\text{cm}^{-1}$ ) spectra of compound 7e

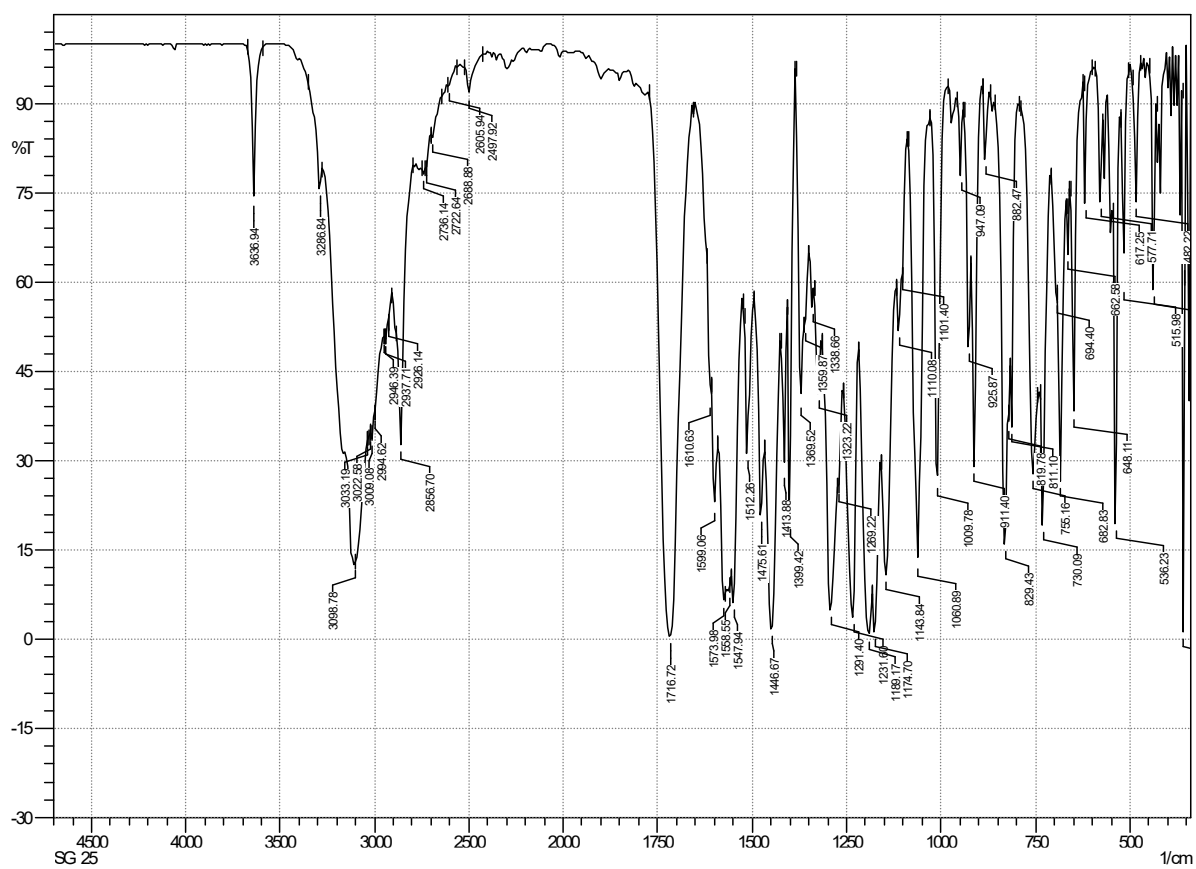

FTIR (KBr,  $\text{cm}^{-1}$ ) spectra of compound 7f

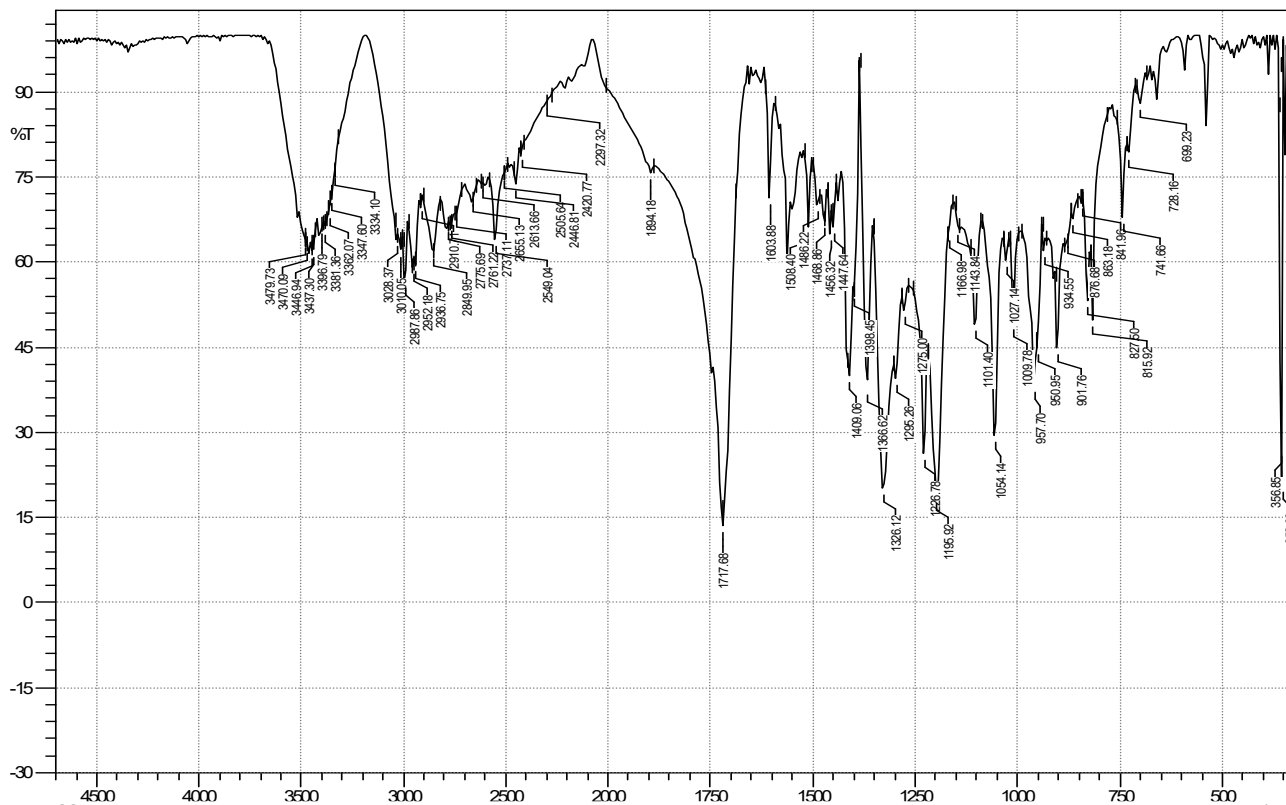

FTIR (KBr, cm<sup>-1</sup>) spectra of compound 7g

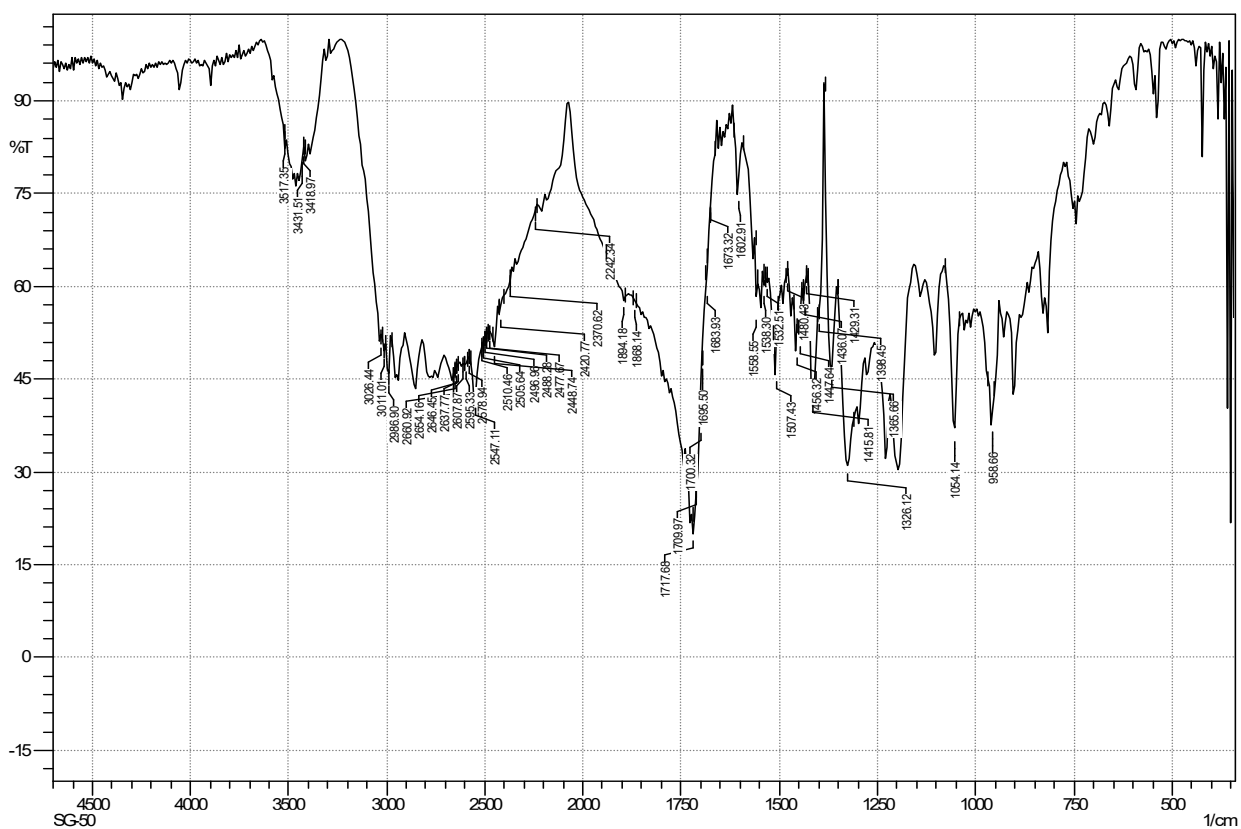

FTIR (KBr, cm<sup>-1</sup>) spectra of compound 7h

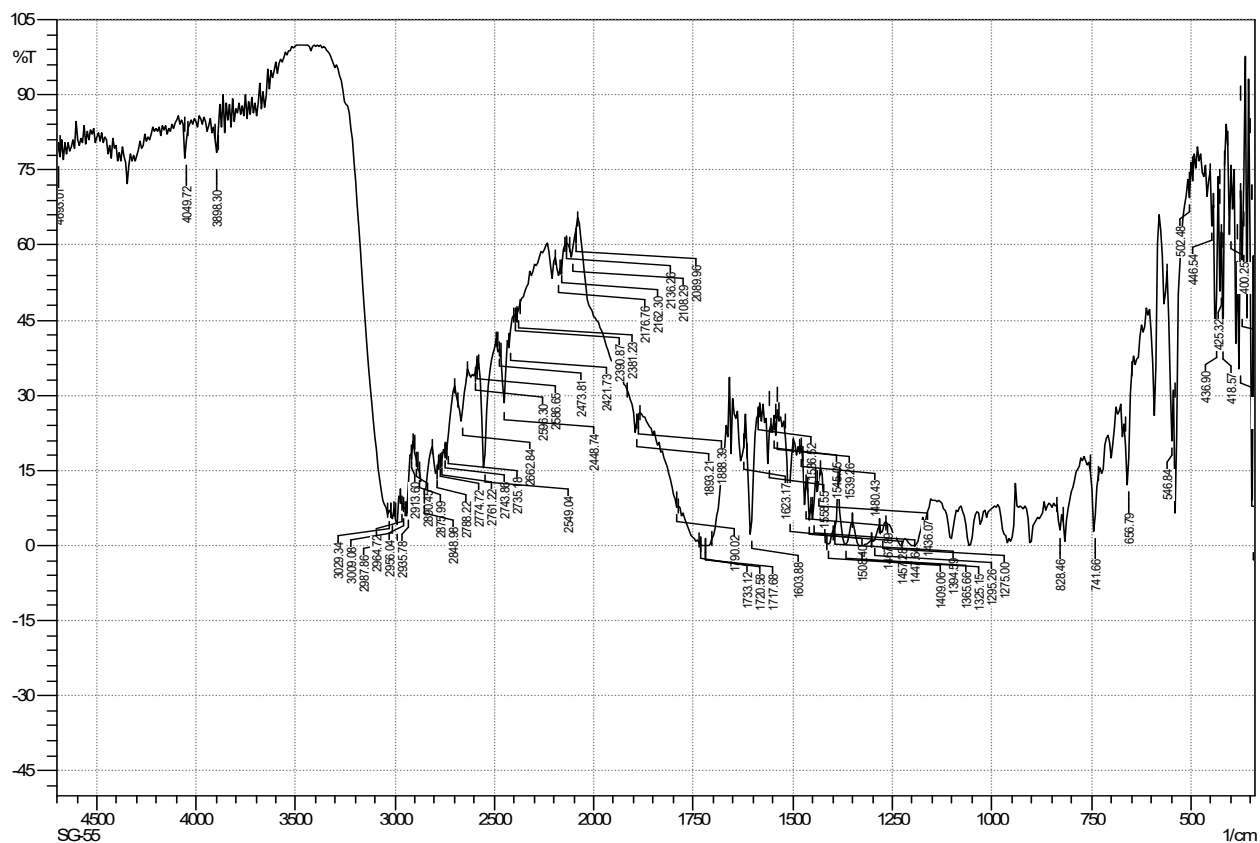

FTIR (KBr, cm<sup>-1</sup>) spectra of compound 7i

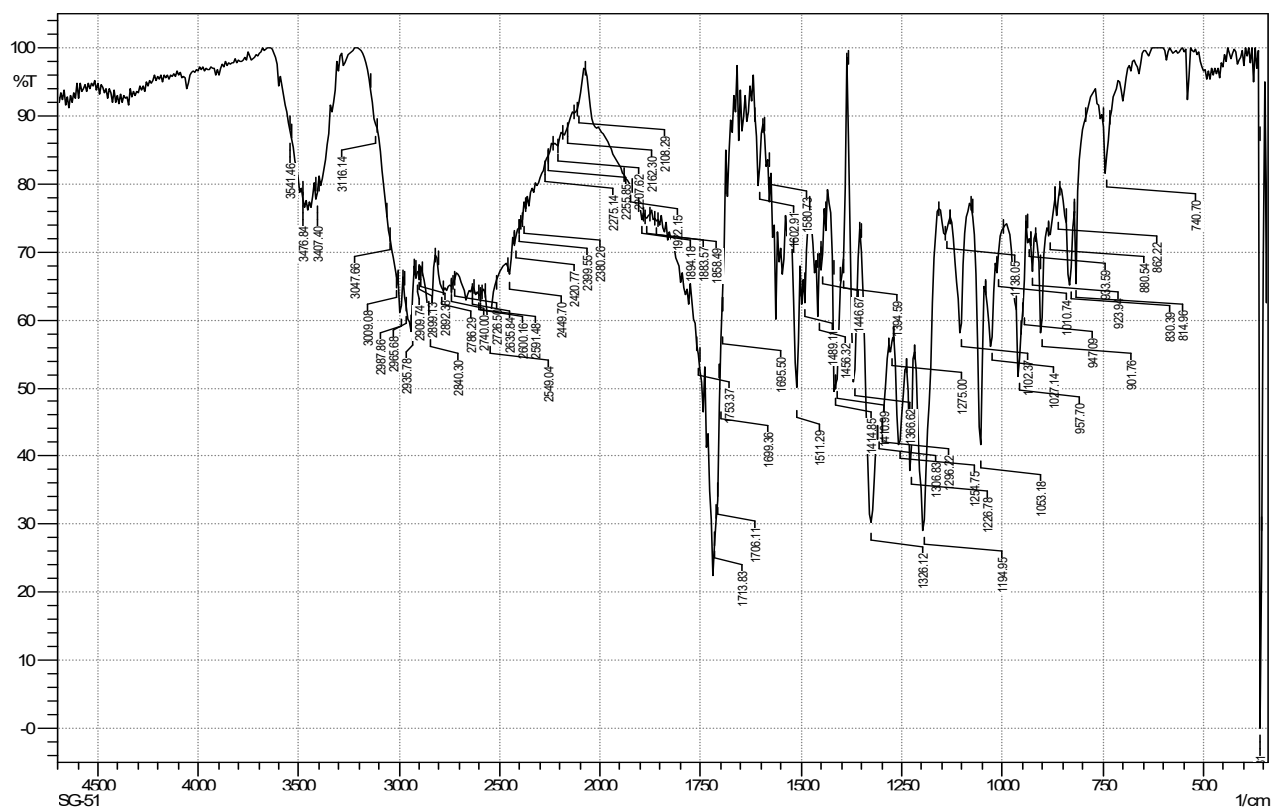

FTIR (KBr, cm<sup>-1</sup>) spectra of compound 7j

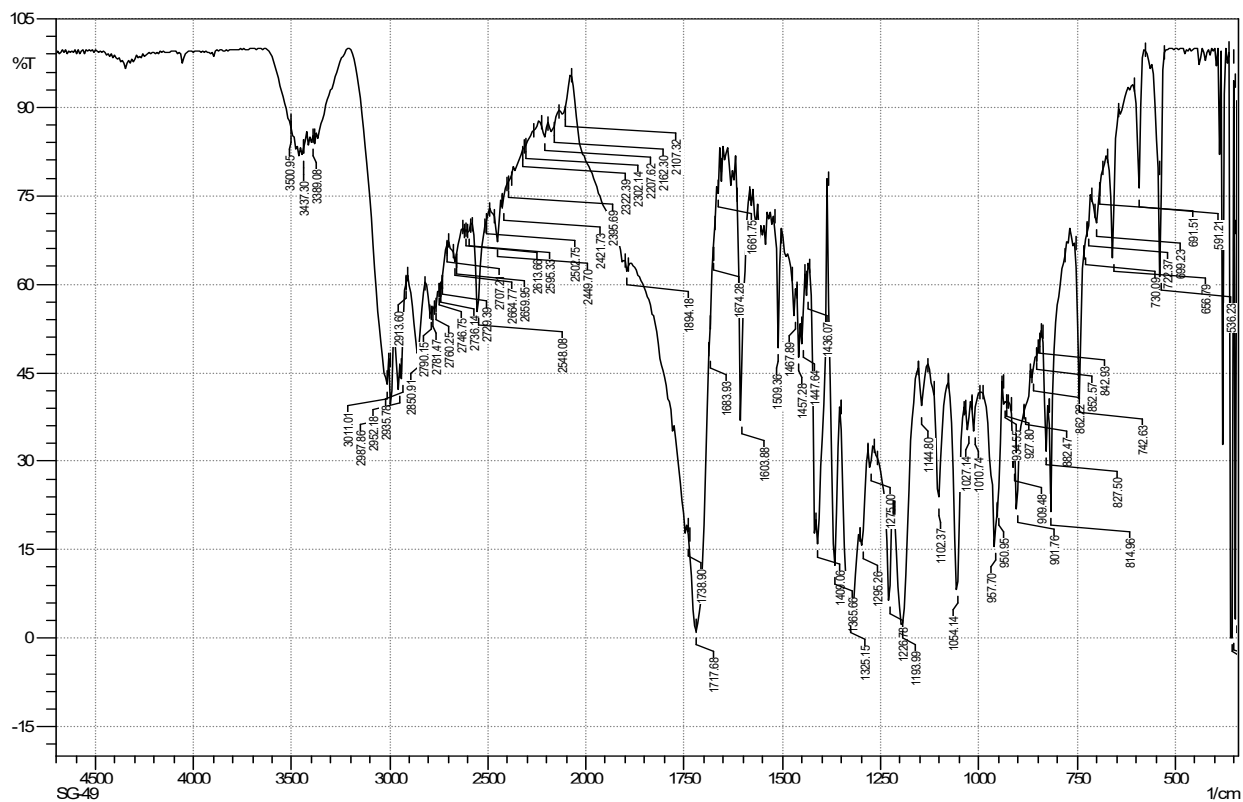

FTIR (KBr,  $\text{cm}^{-1}$ ) spectra of compound 7k

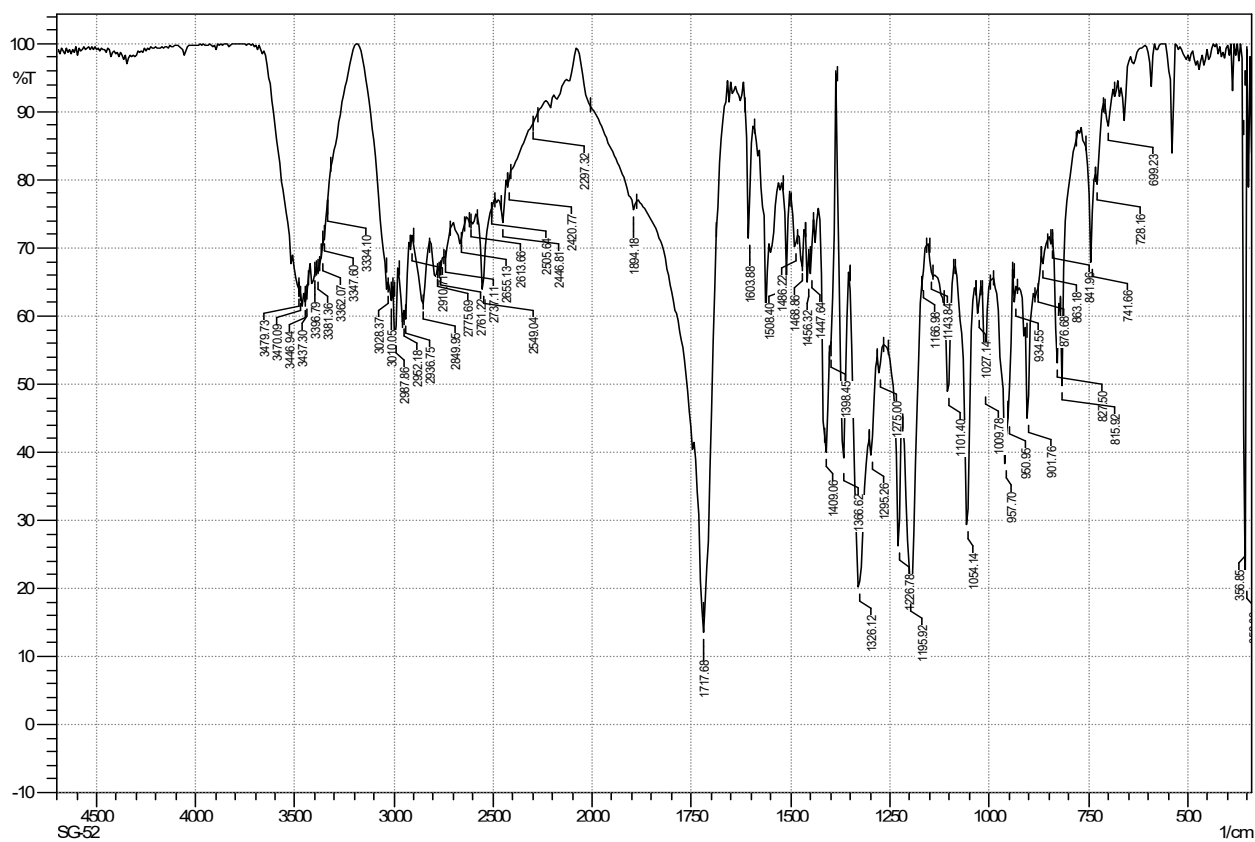

FTIR (KBr,  $\text{cm}^{-1}$ ) spectra of compound 7l
