# Supplementary material for: Novel rhodanine–thiazole hybrids as potential antidiabetic agents: a structure-based drug design approach
Source: Royal Society of Chemistry journal article supplement (doi:10.1039/d4md00689e), 2024-11-21
Supplement: d4md00689e2.pdf [file d4md00689e2.pdf]

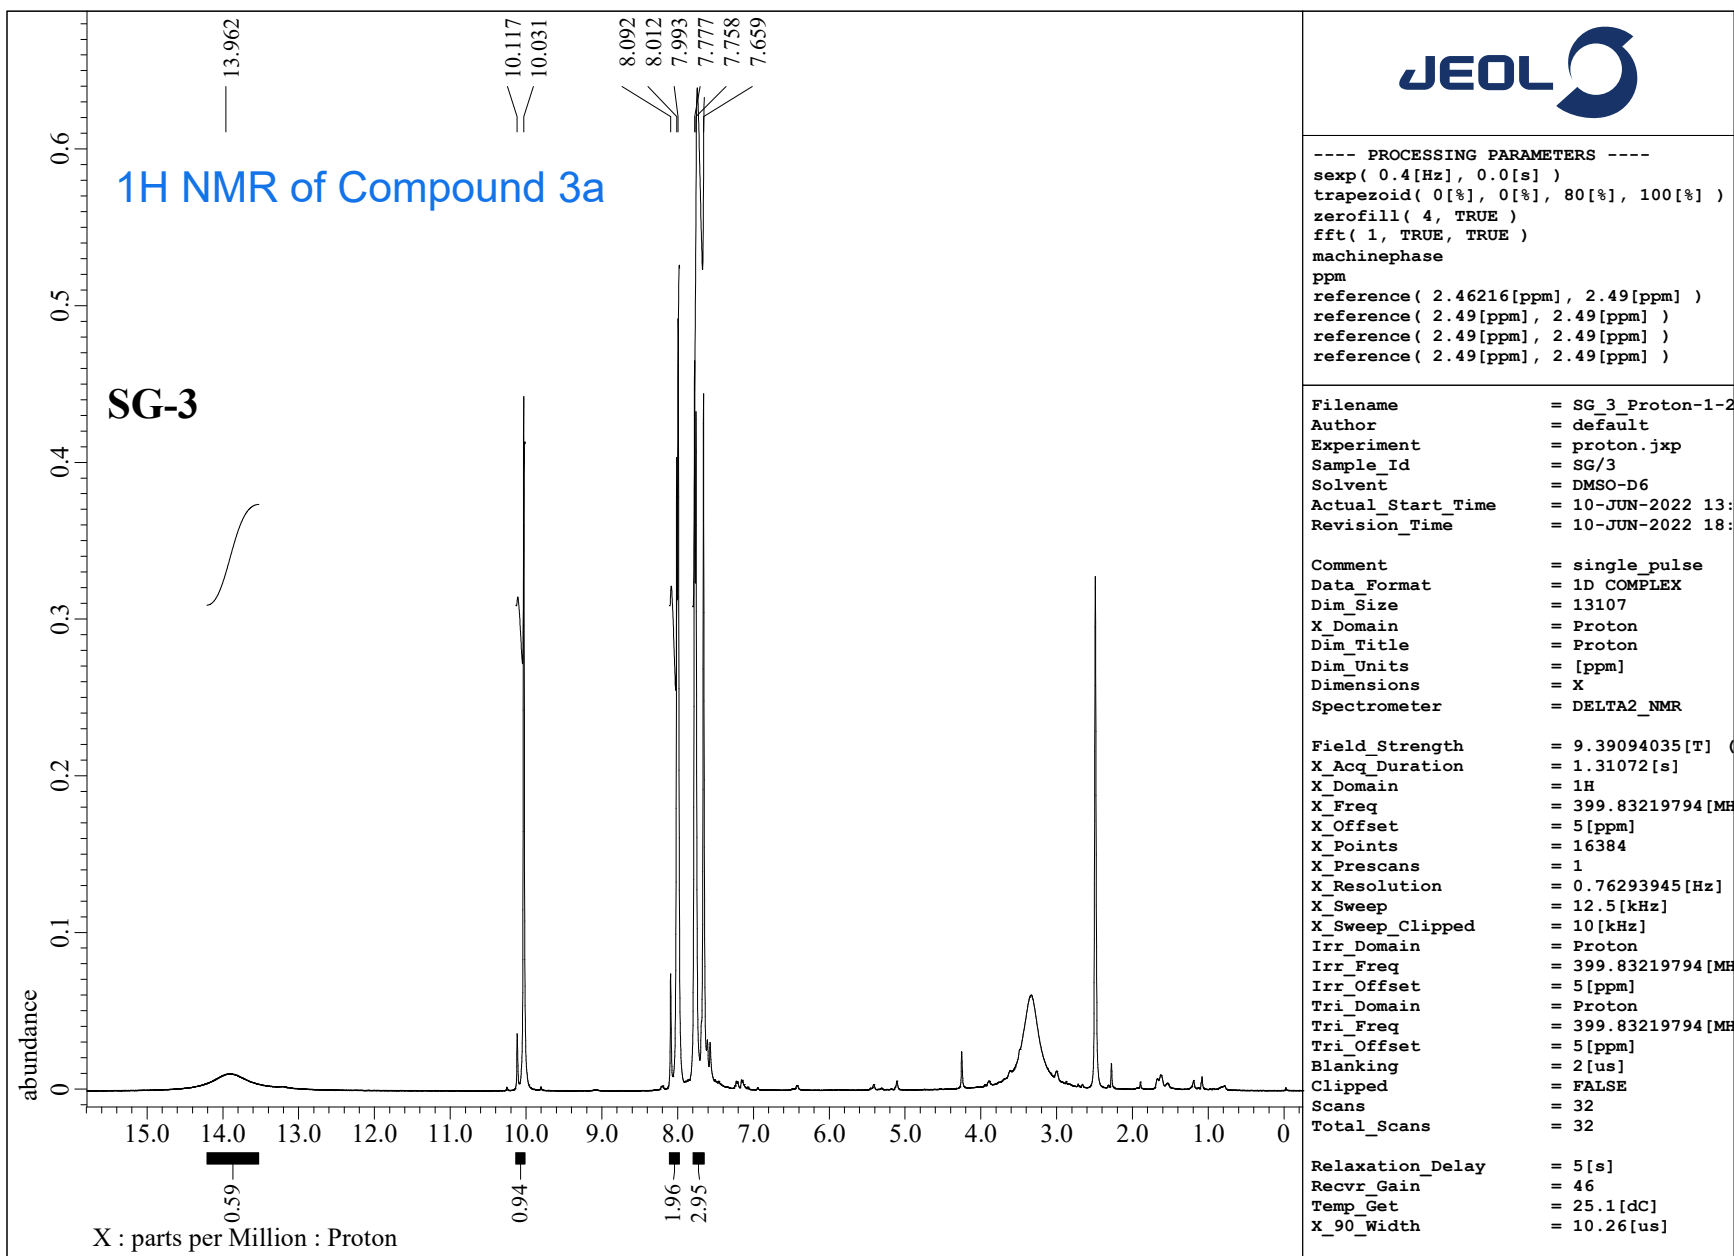

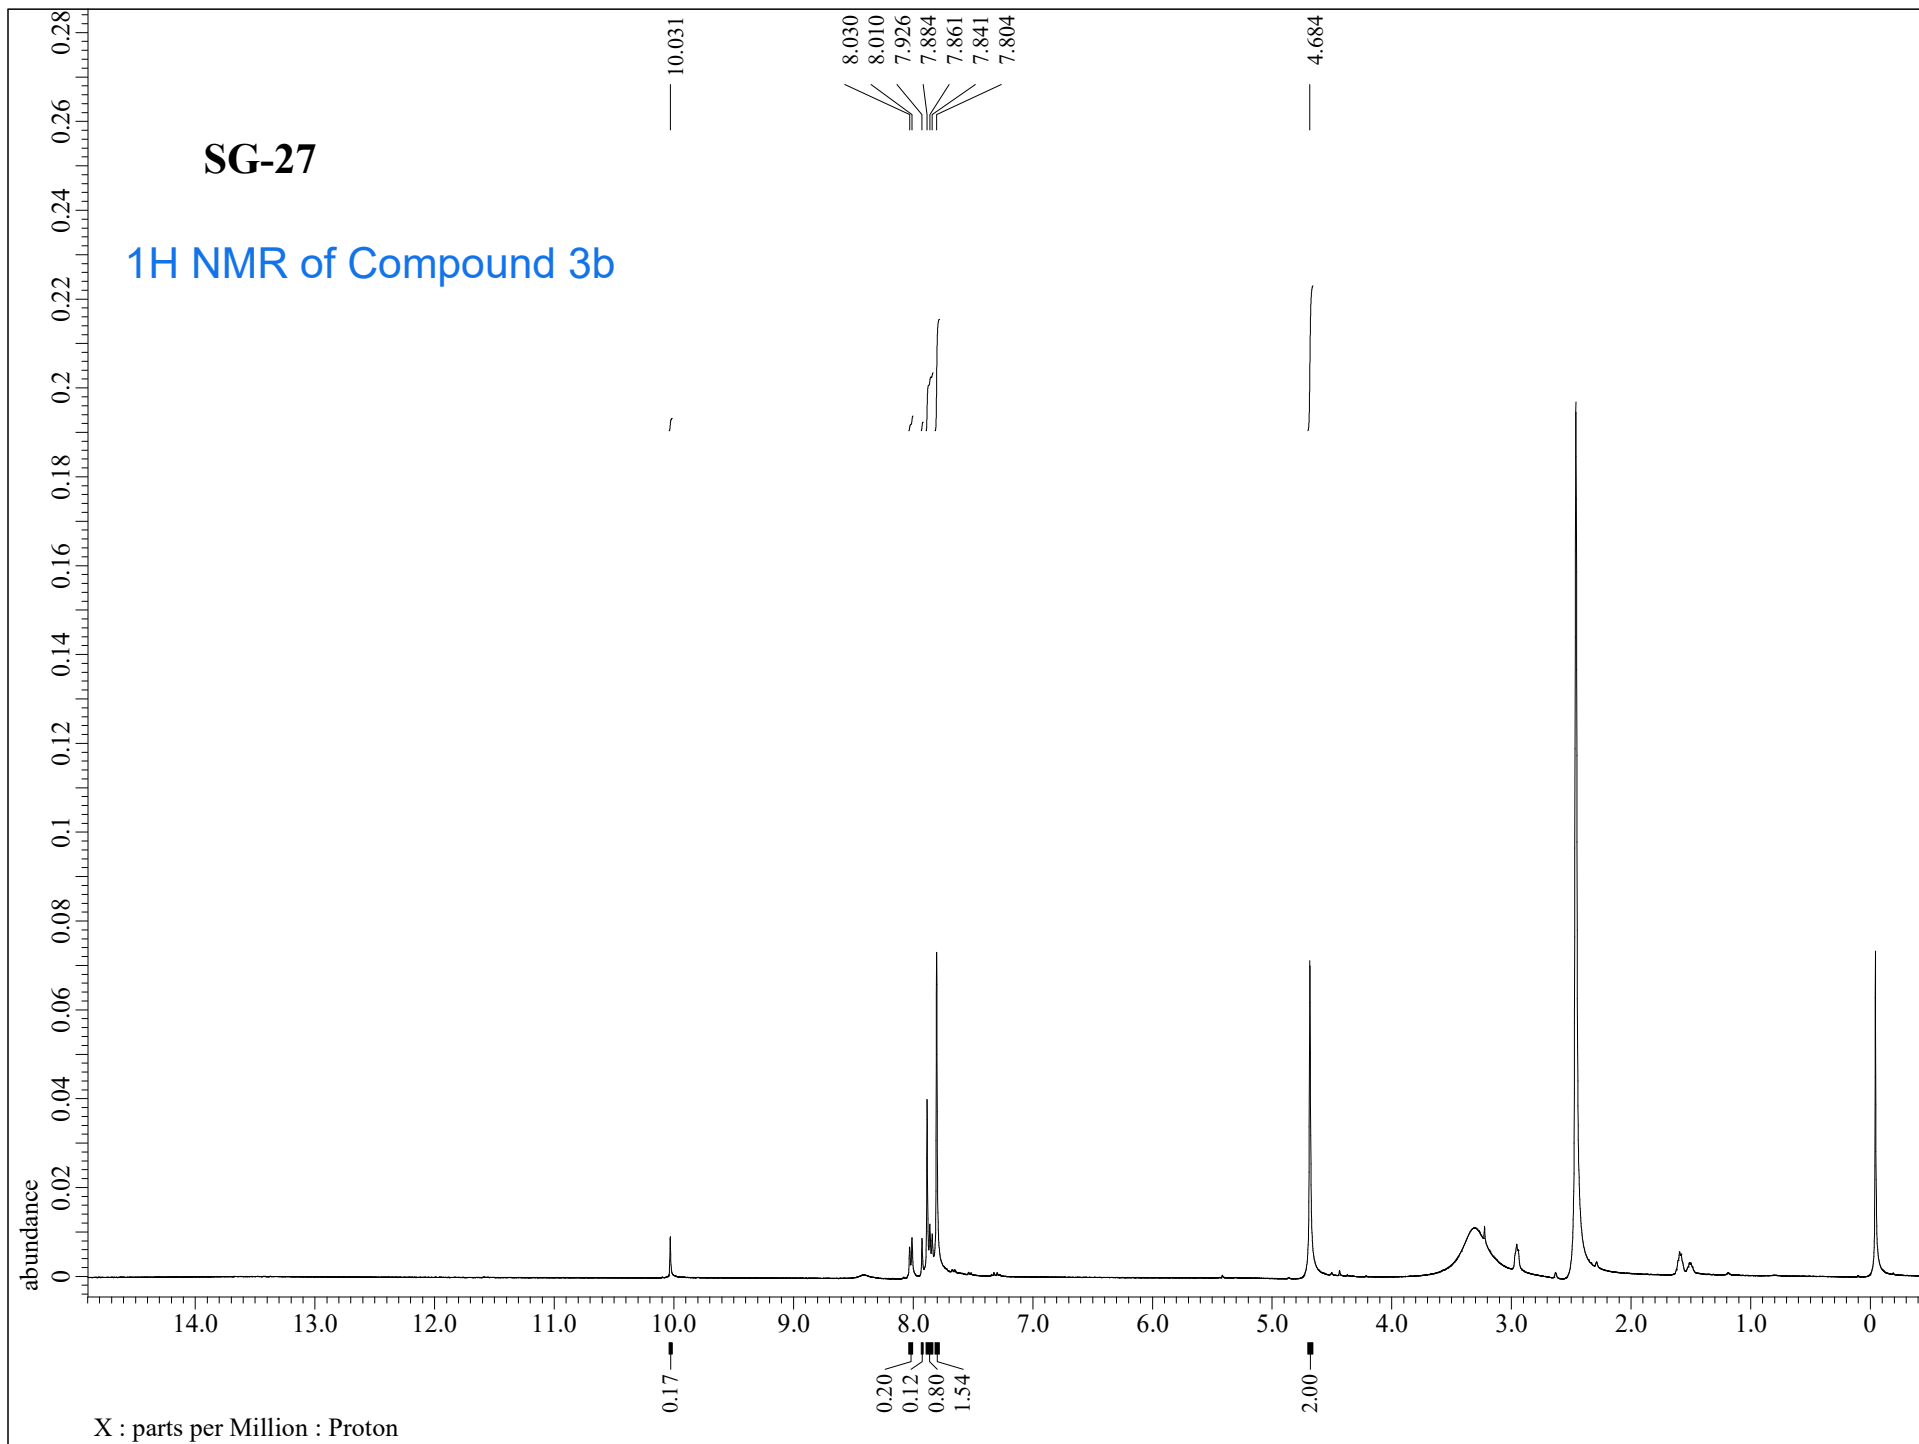

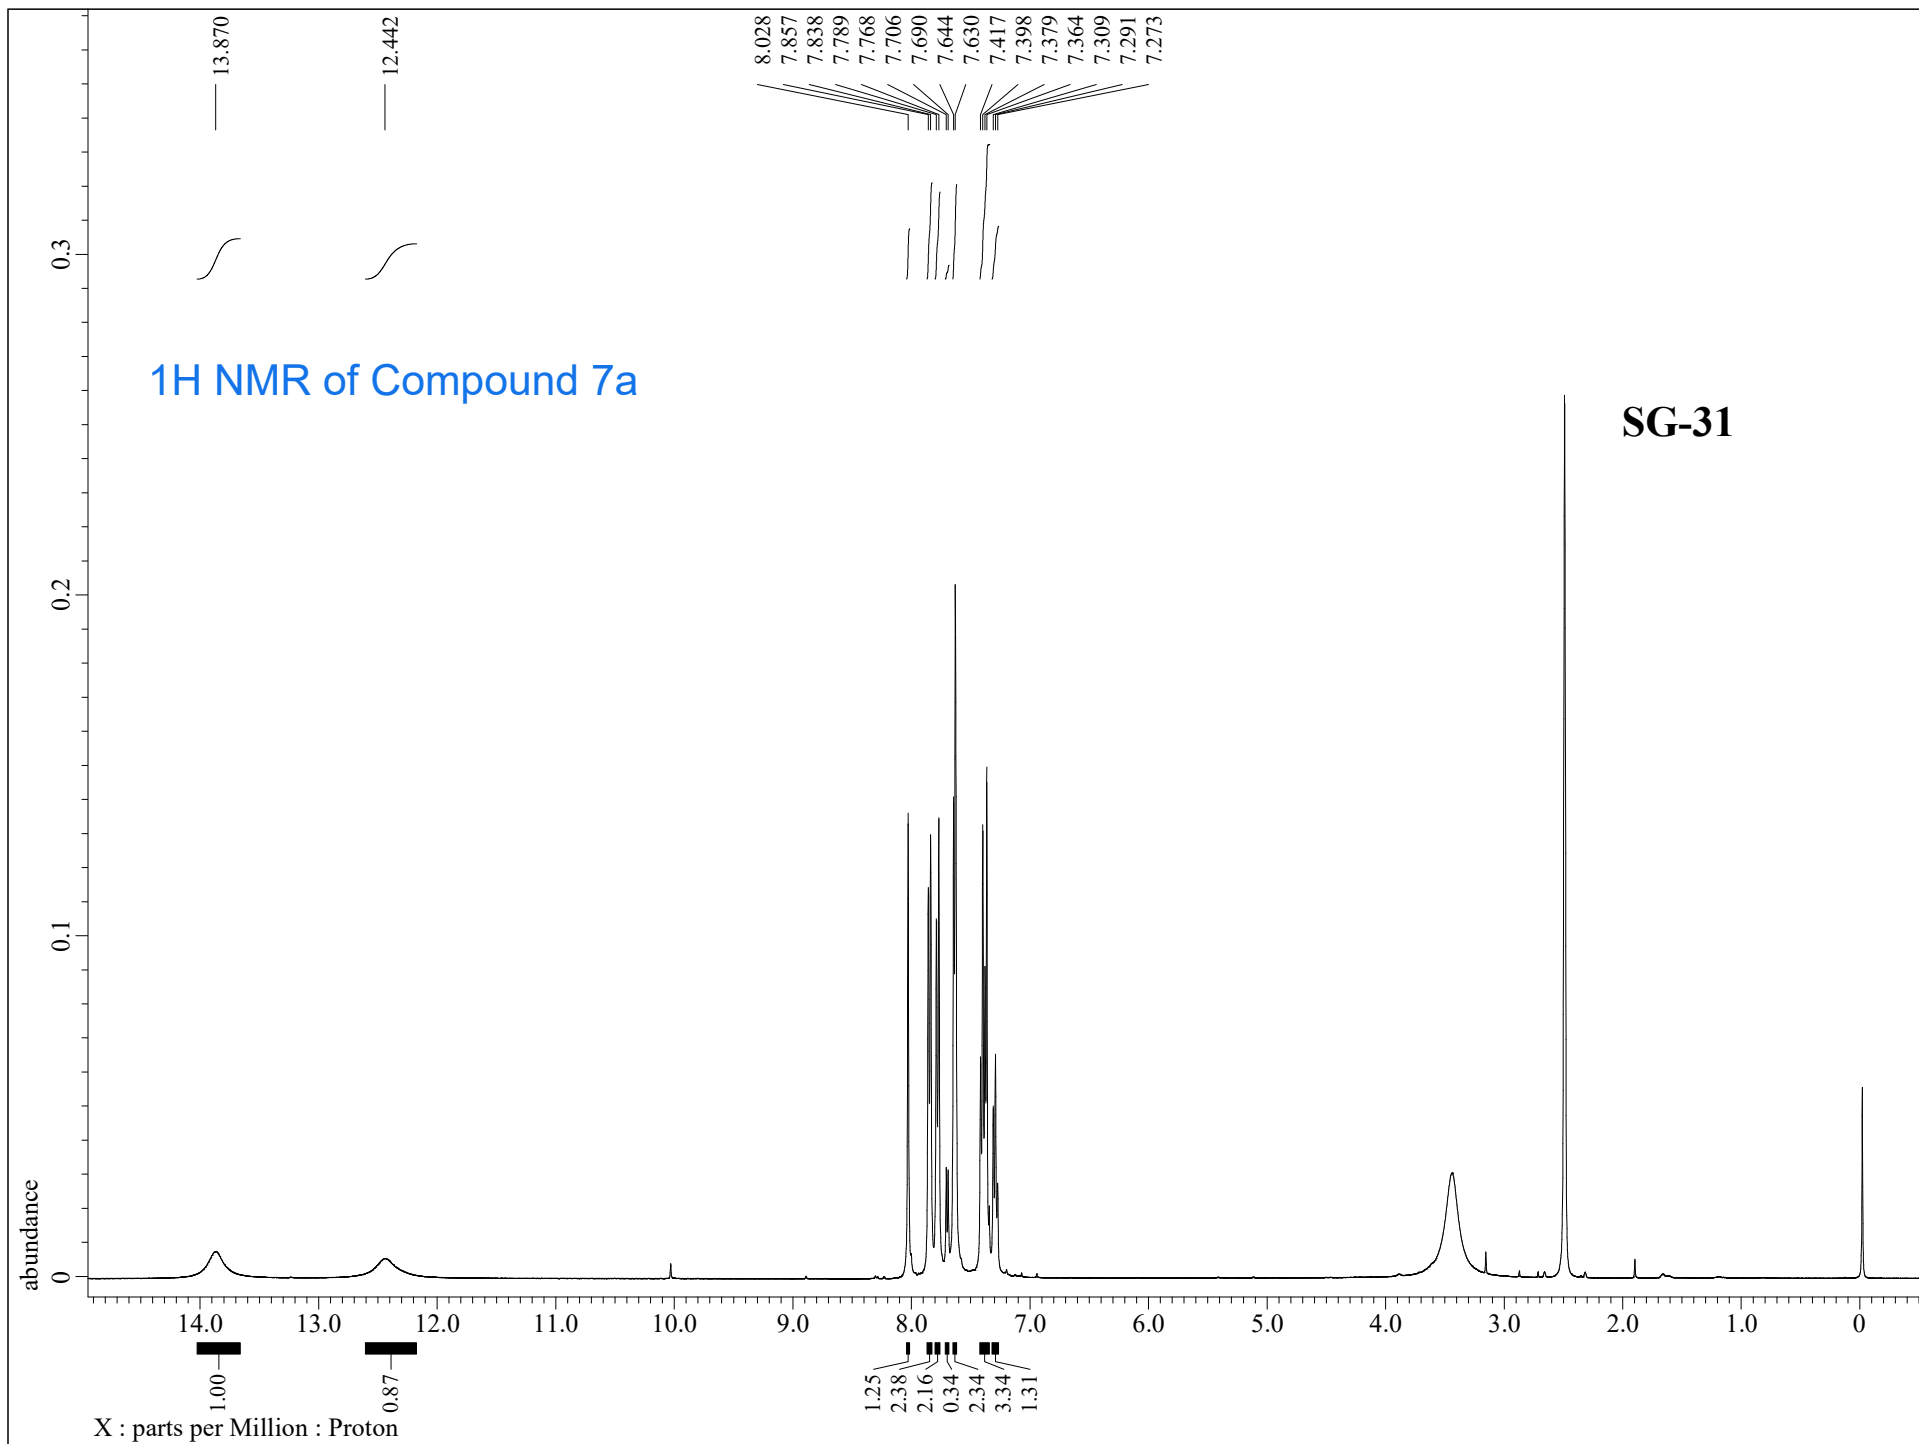

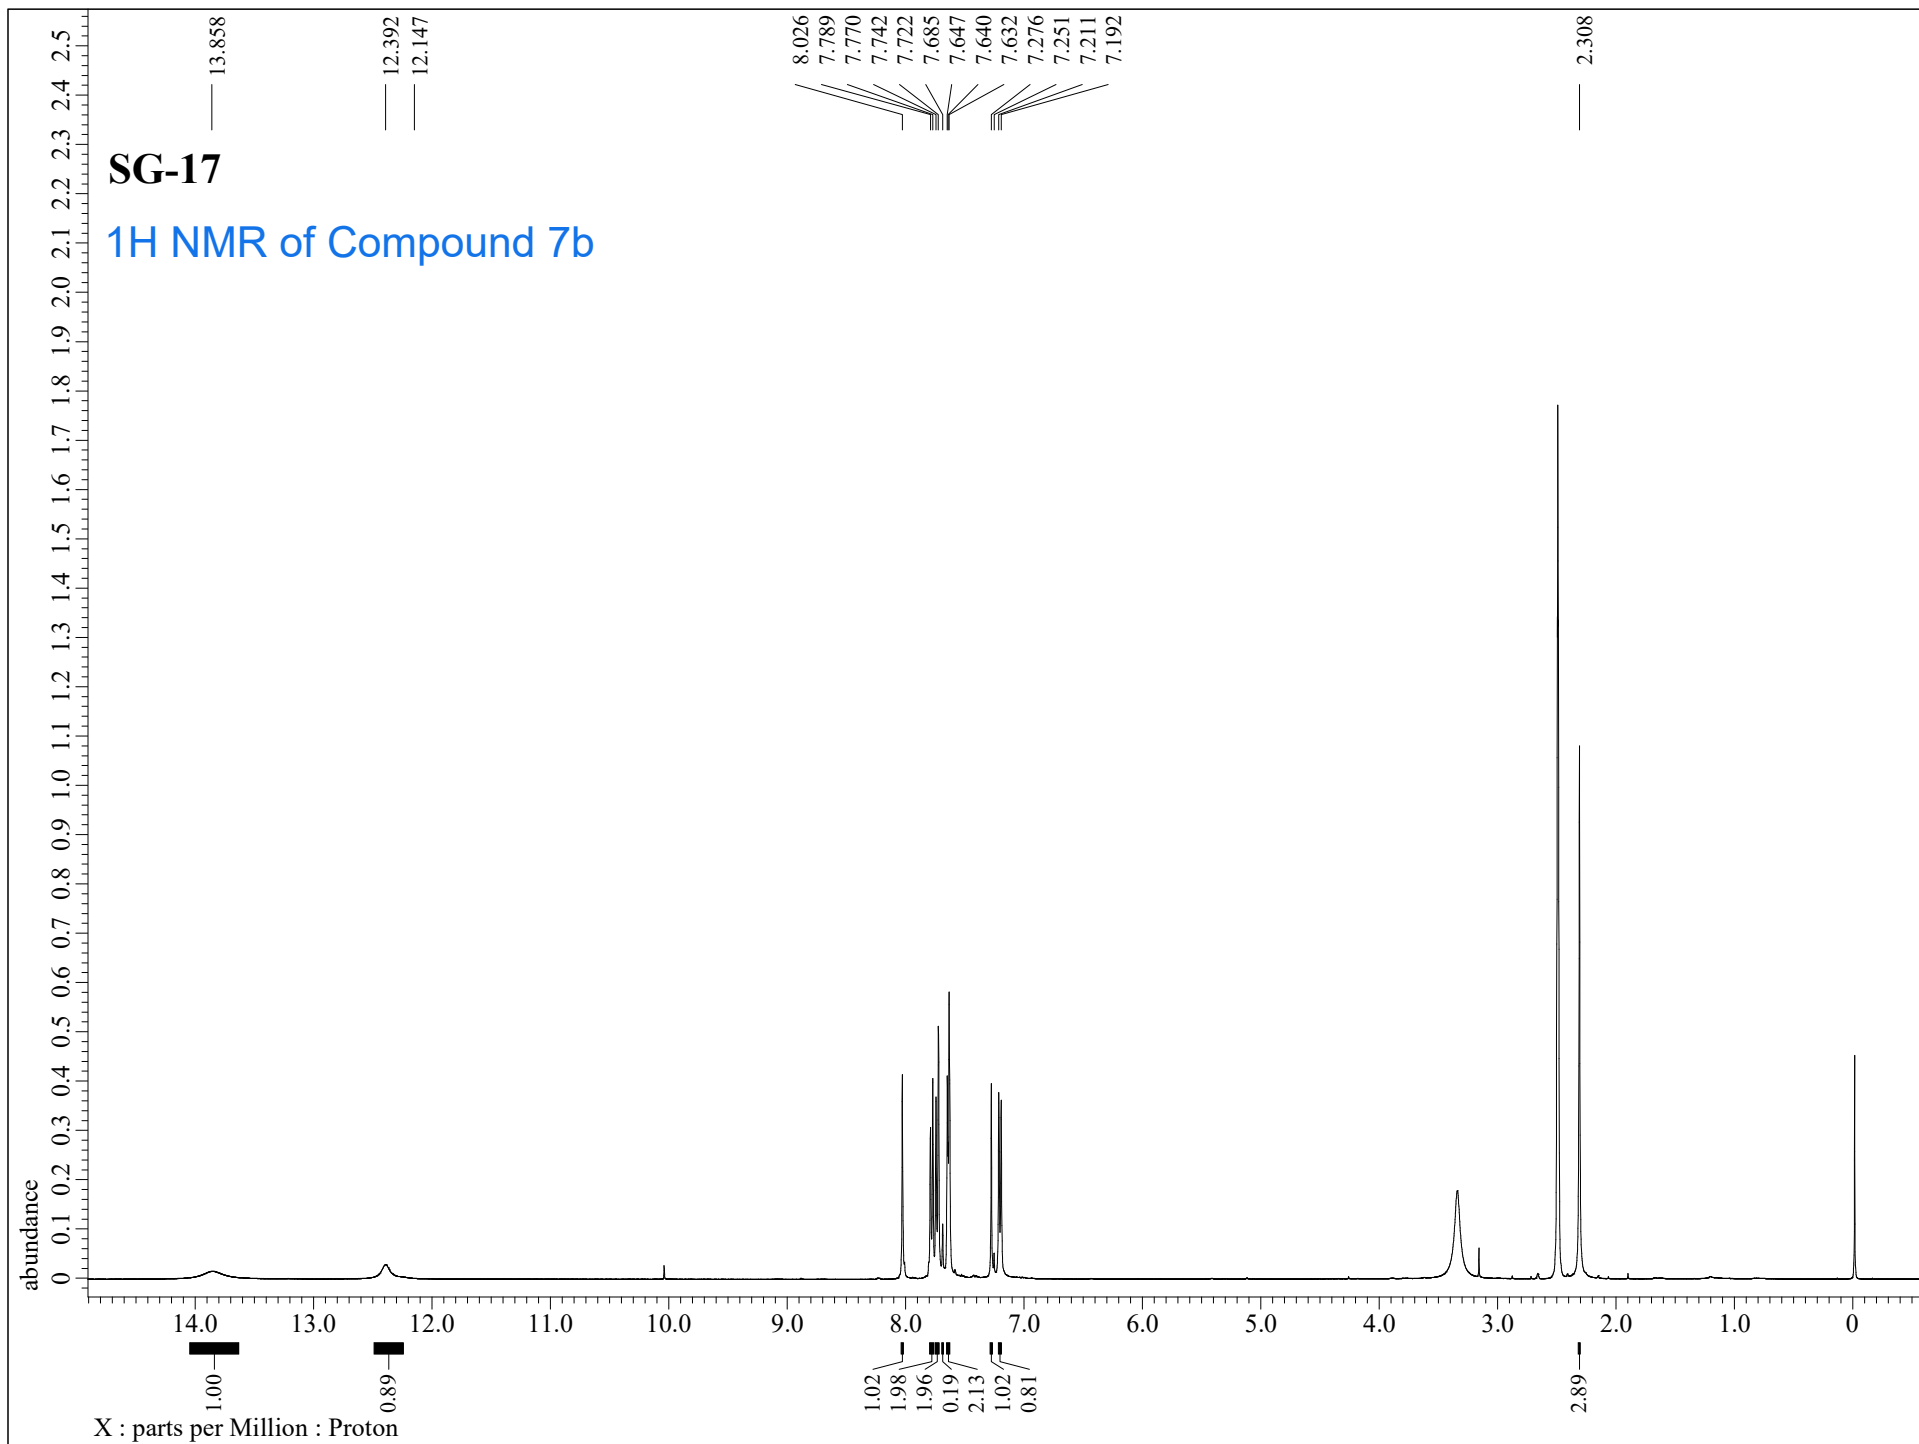

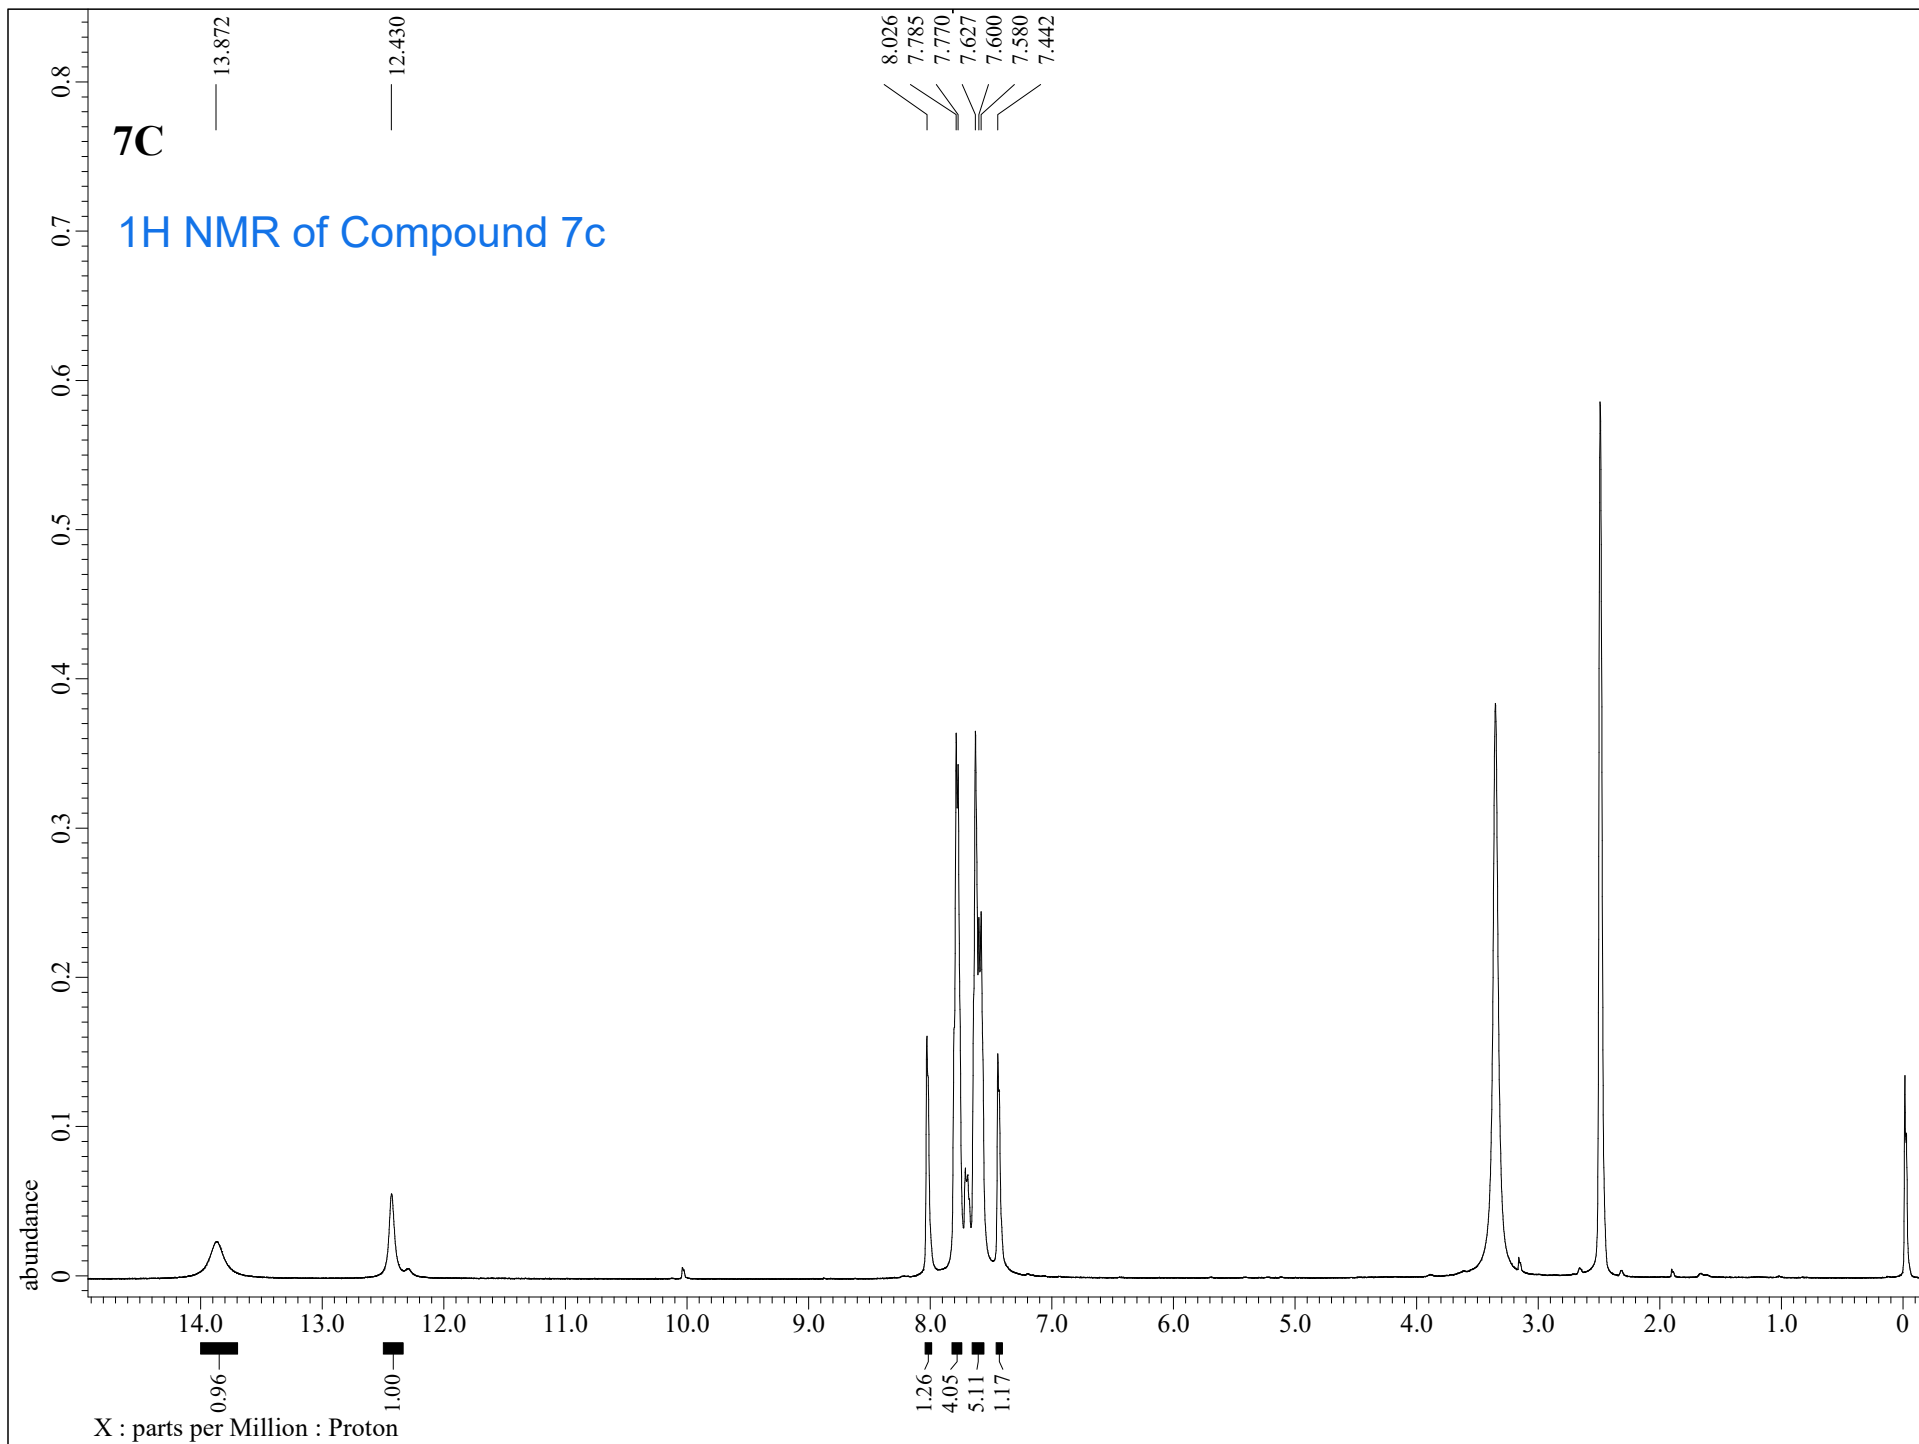

# 19F NMR of Compound 7c

SG-60

Sample Name:

SG-60

Data Collected on:

localhost.localdomain-vmr400

Archive directory:

/home/vnmr1/vnmrsys/data/2024/Oct/20241023

Sample directory:

SG-60\_20241023\_01

FidFile: SG-60-FLUORINE\_01

Pulse Sequence: FLUORINE (s2pul)

Solvent: dmsd

Data collected on: Oct 23 2024

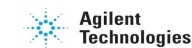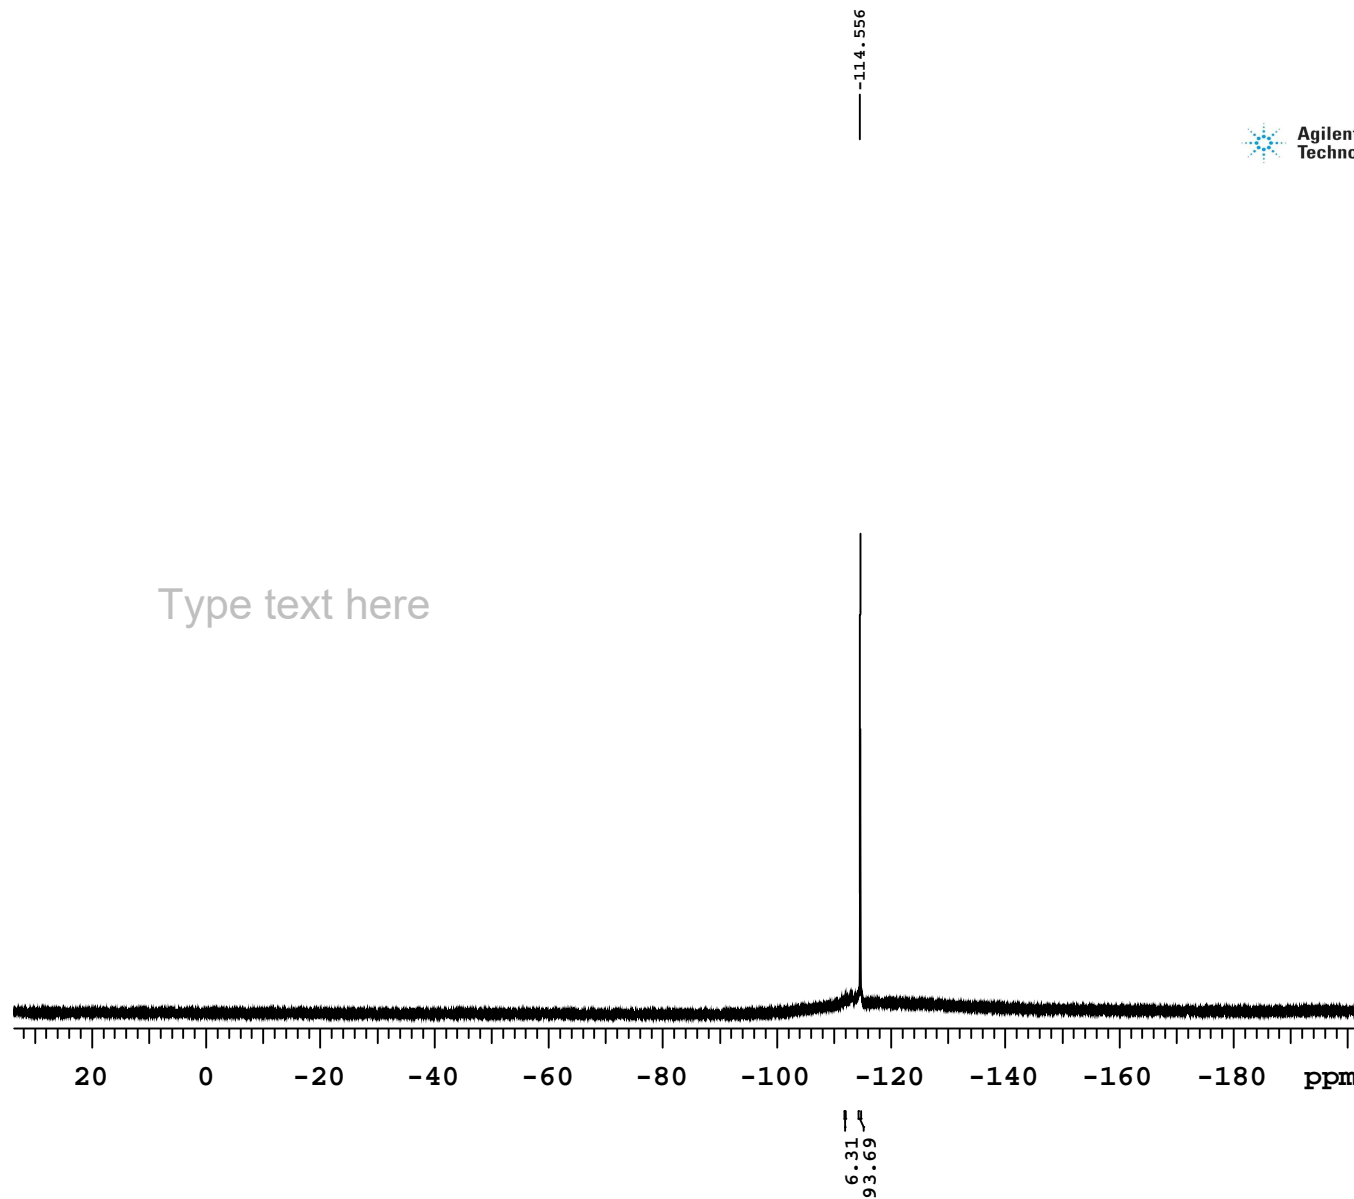

Plotname: SG-60-FLUORINE\_01\_plot01--

**INTEGRAL VALUES**

| Integral | start(ppm) | end      | value  |
|----------|------------|----------|--------|
| 1        | 33.656     | -111.911 | 3.909  |
| 2        | -111.911   | -112.067 | 0.493  |
| 3        | -112.067   | -114.373 | 7.496  |
| 4        | -114.373   | -114.811 | 7.321  |
| 5        | -114.811   | -203.653 | 80.782 |

**PEAK FREQUENCIES**

| index | freq(ppm) | intensity |
|-------|-----------|-----------|
| 1     | -114.556  | 37.6392   |

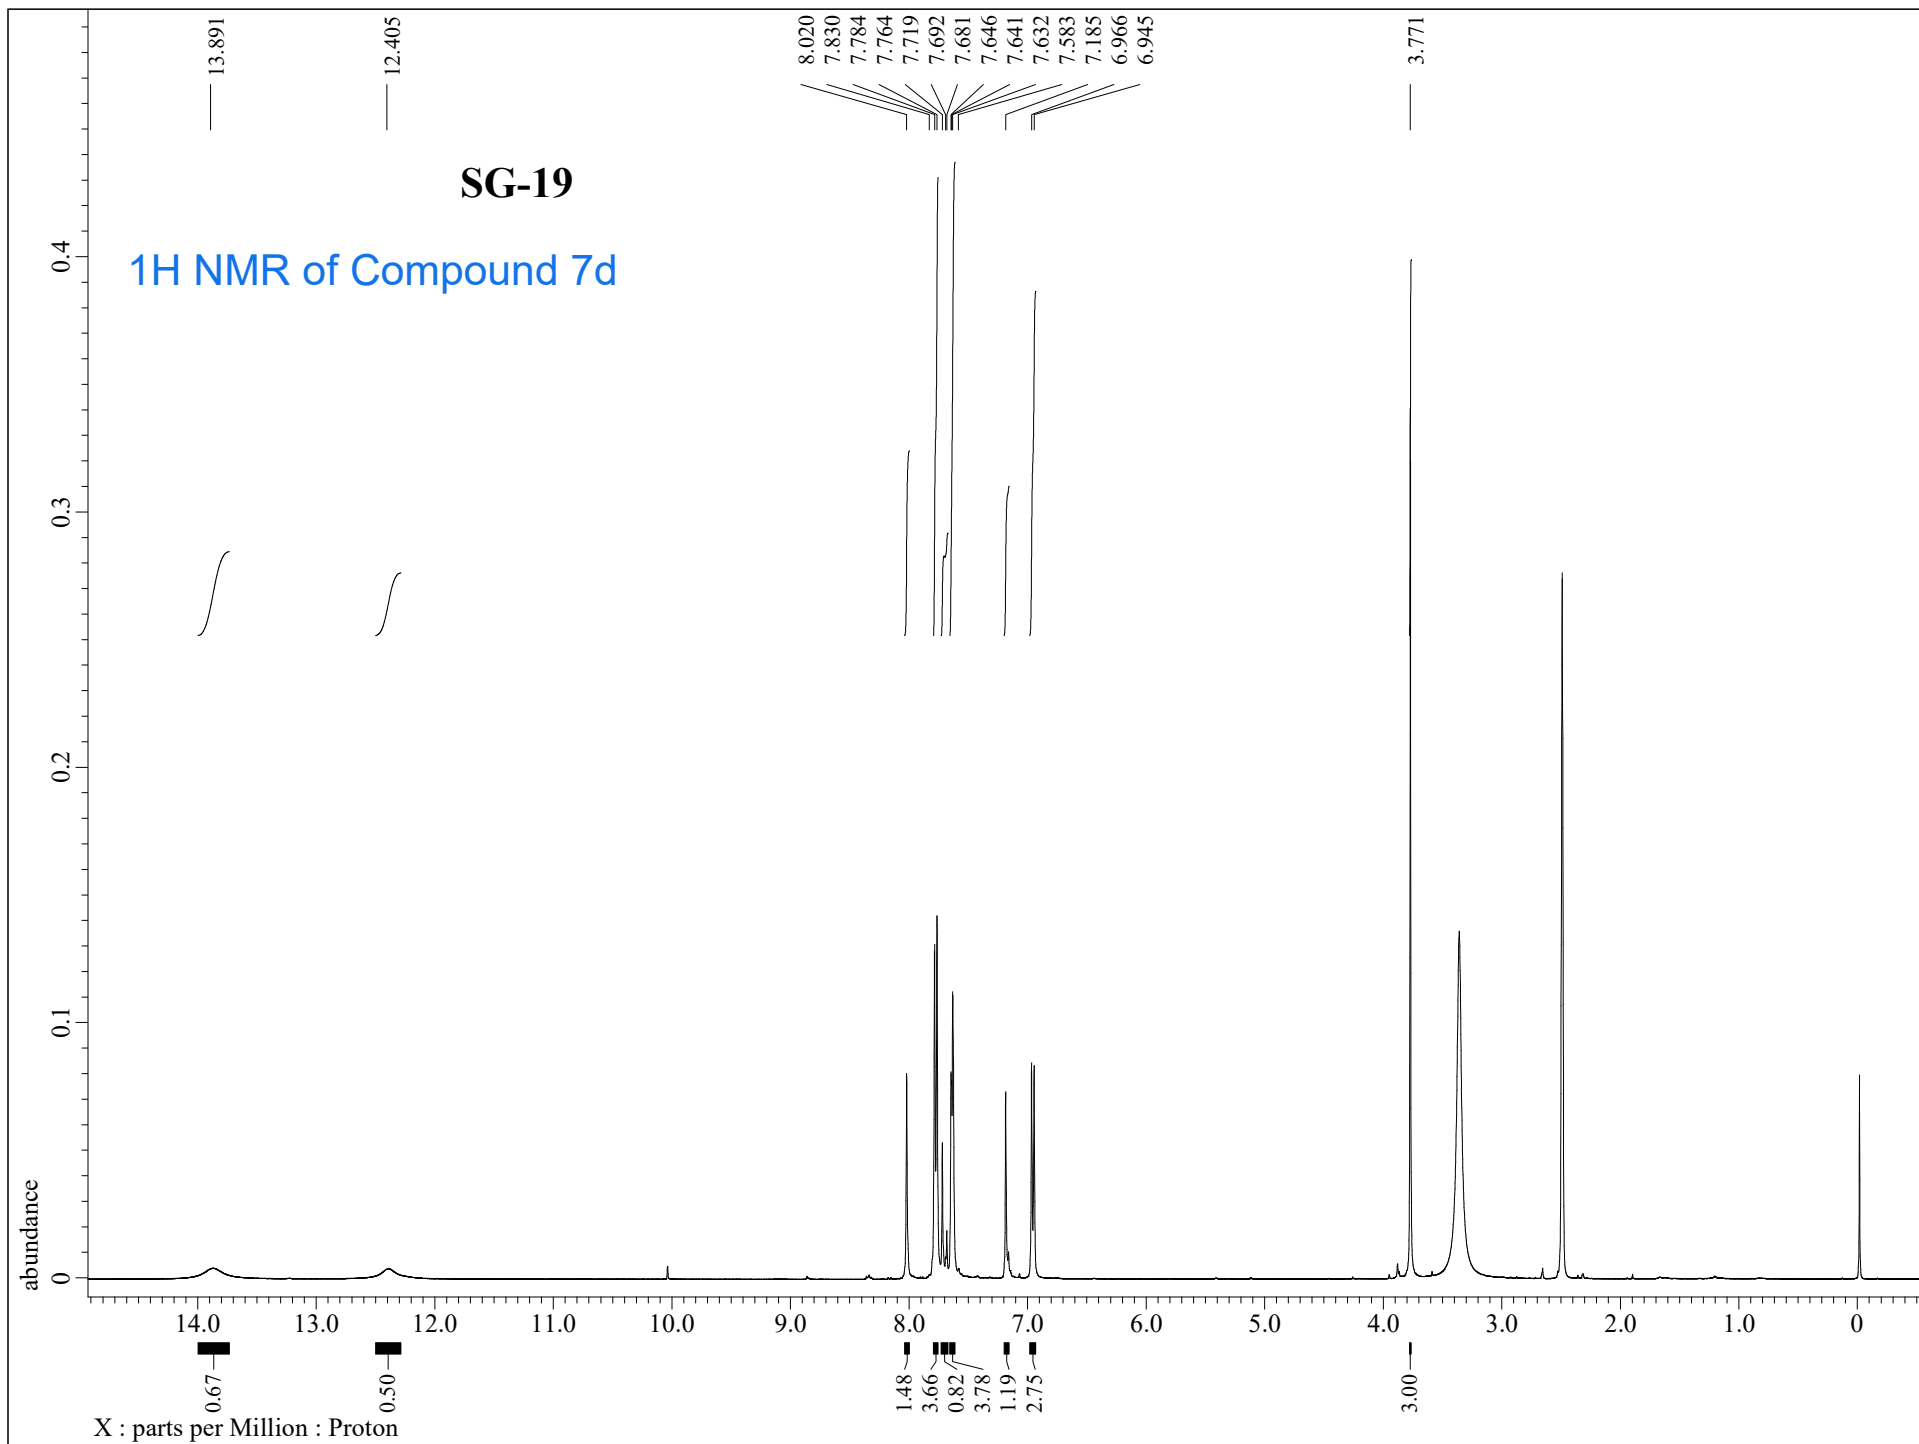



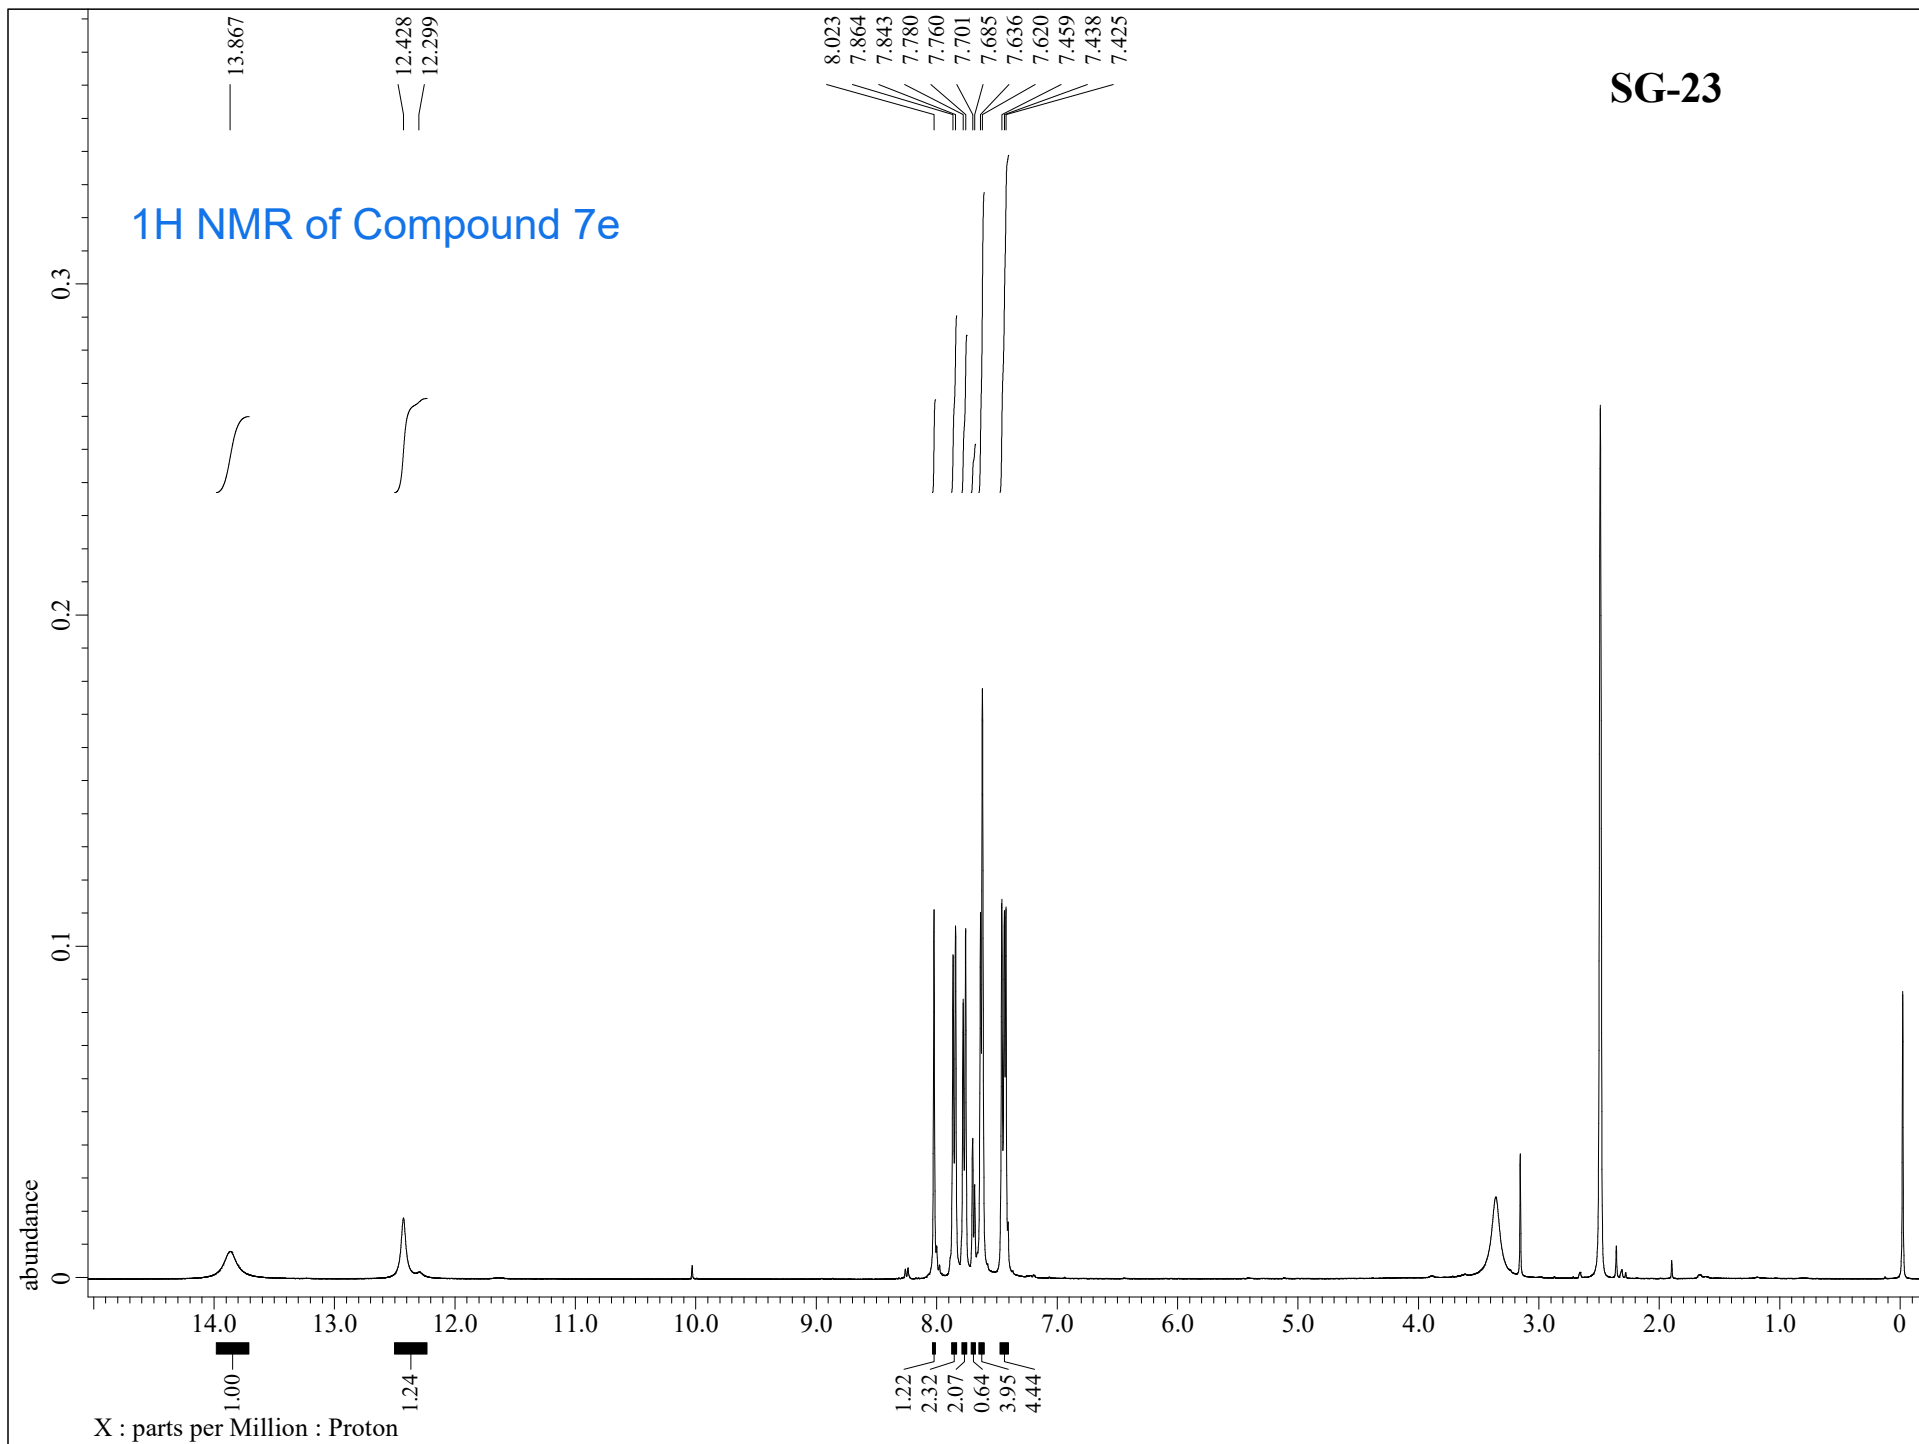

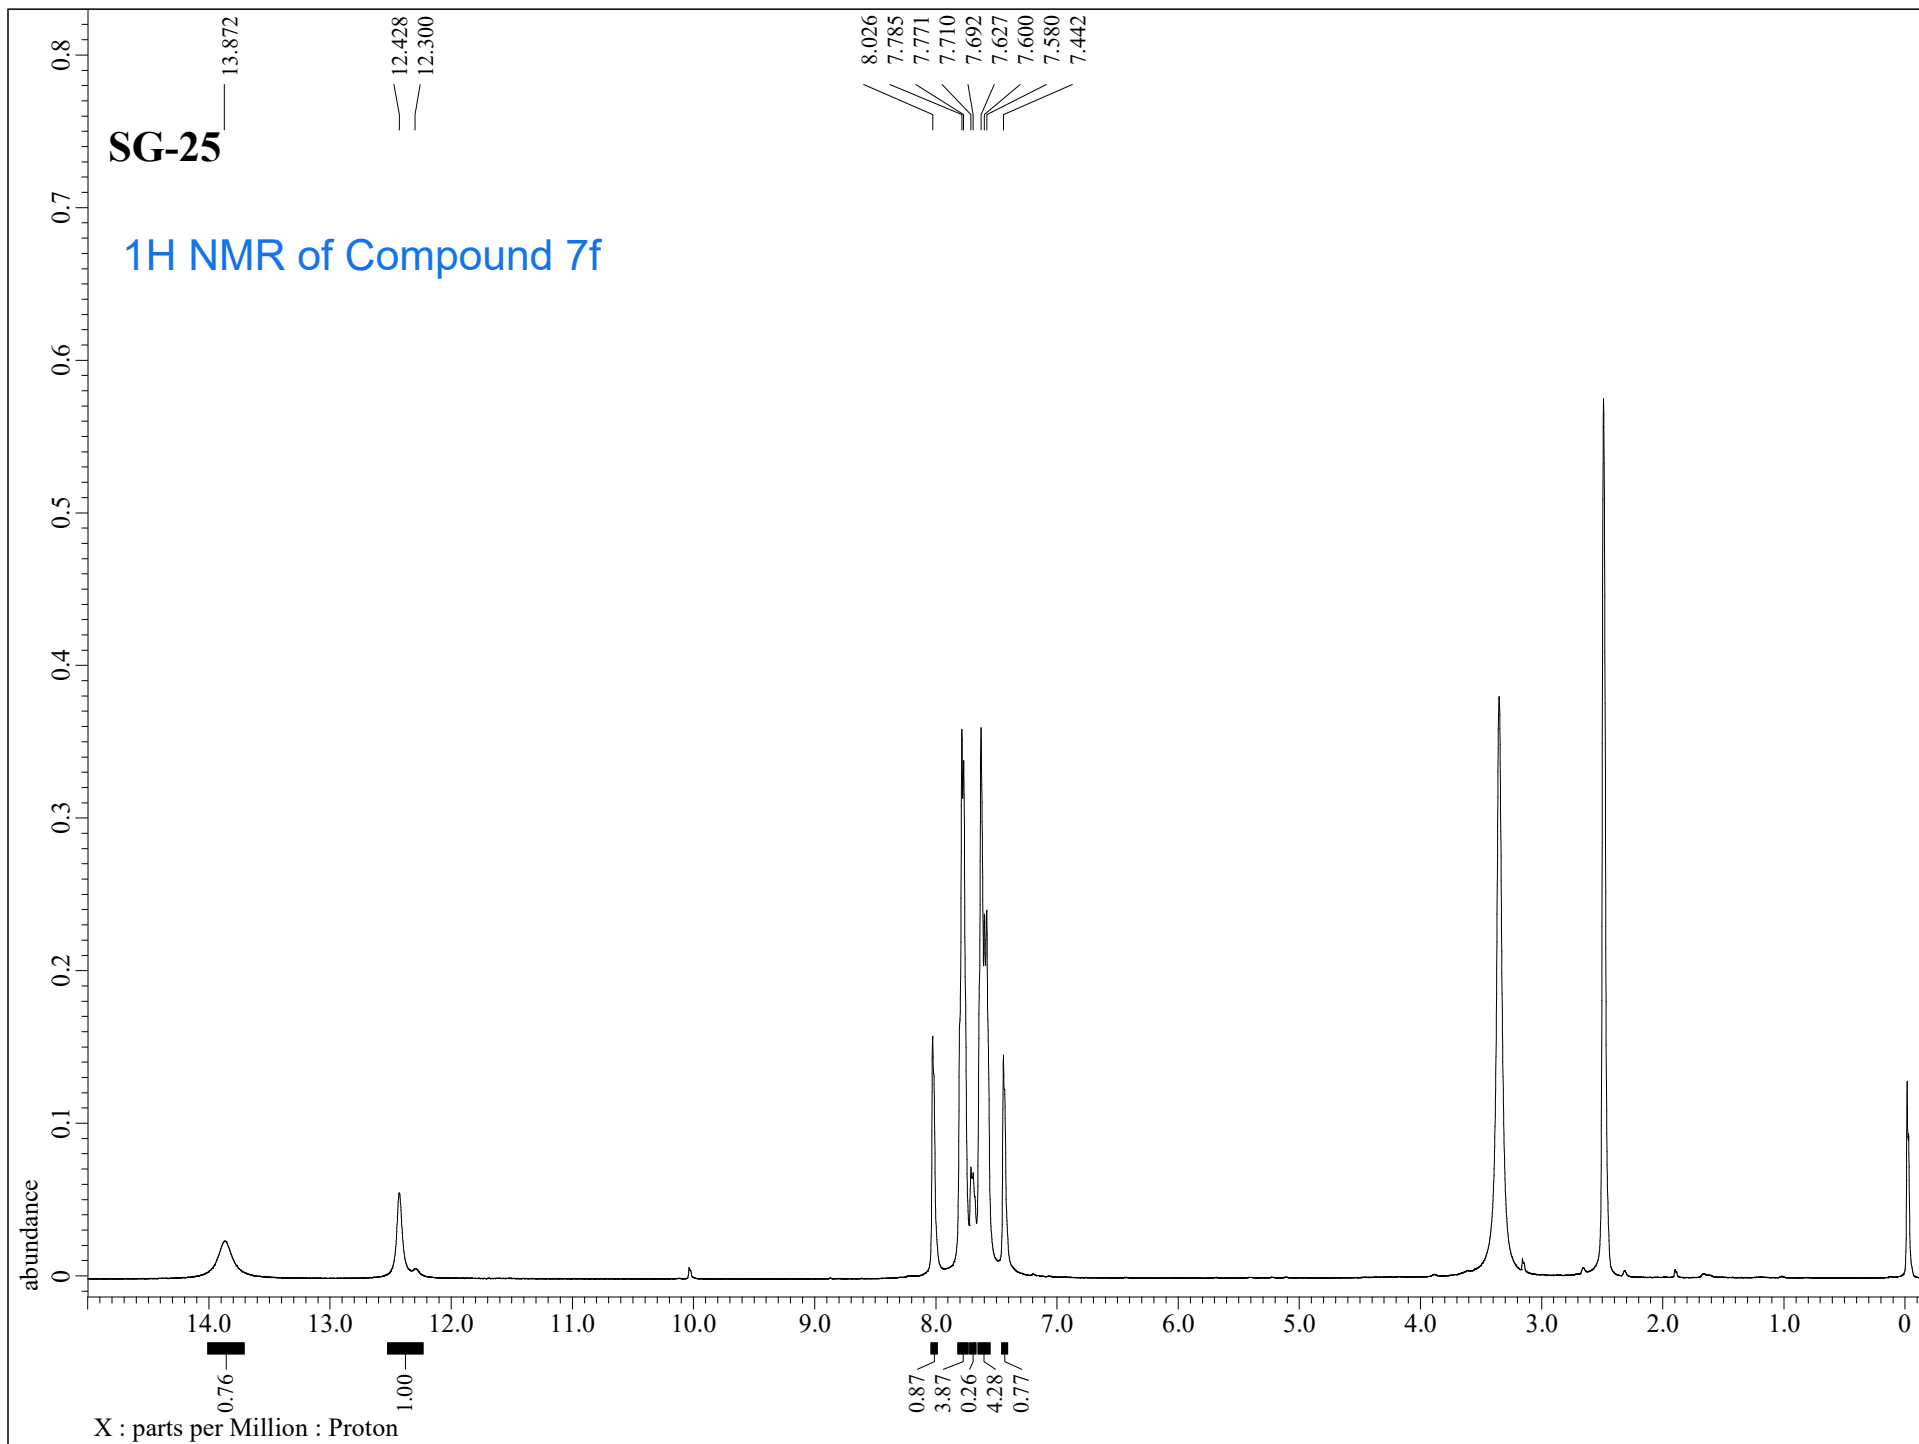

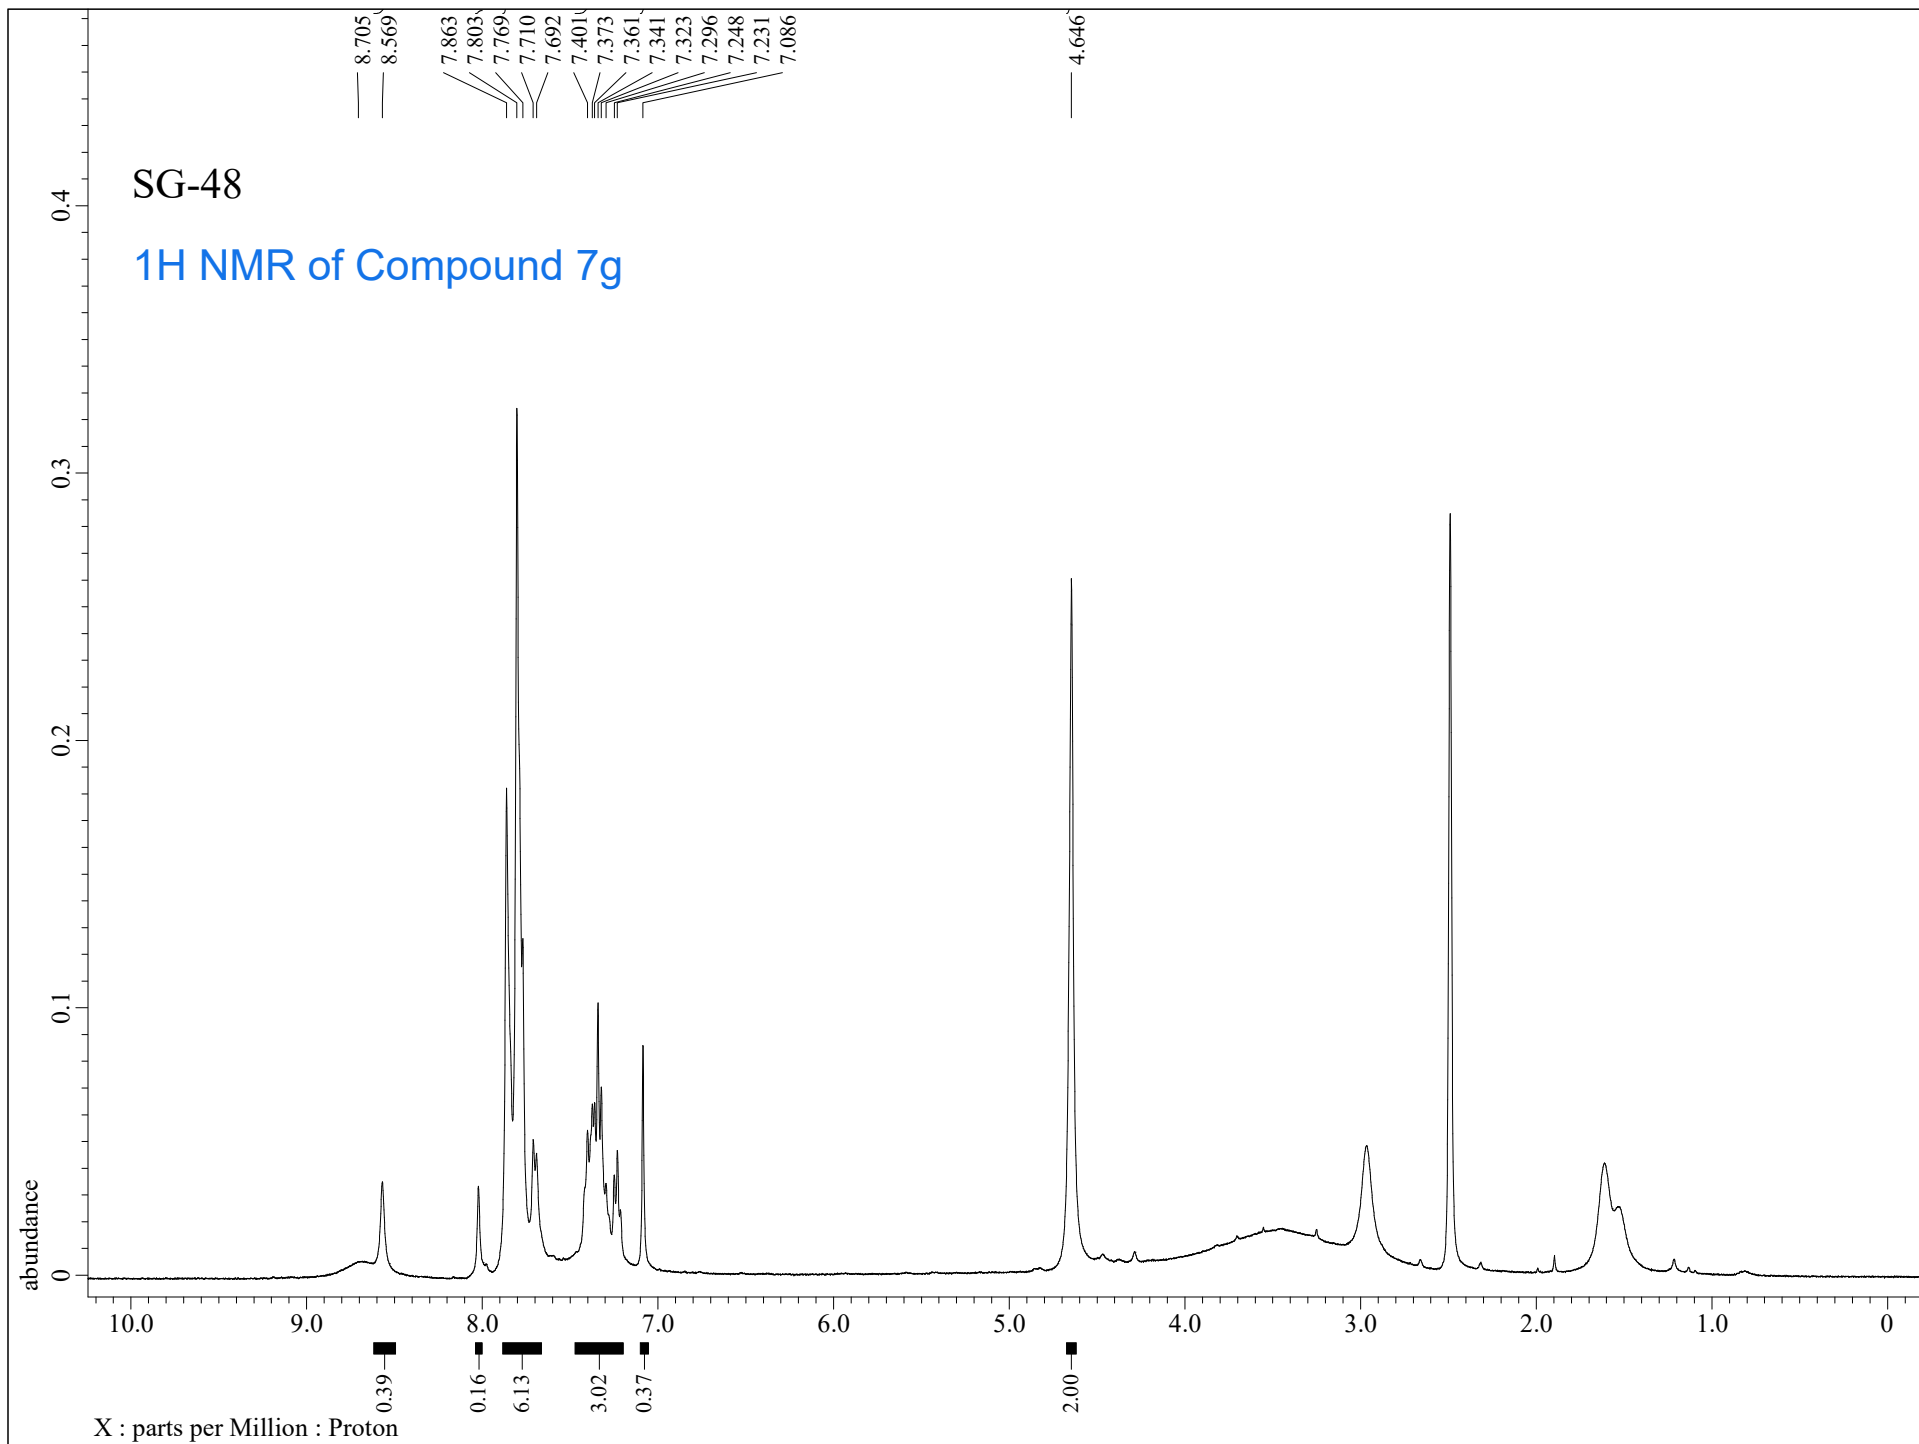

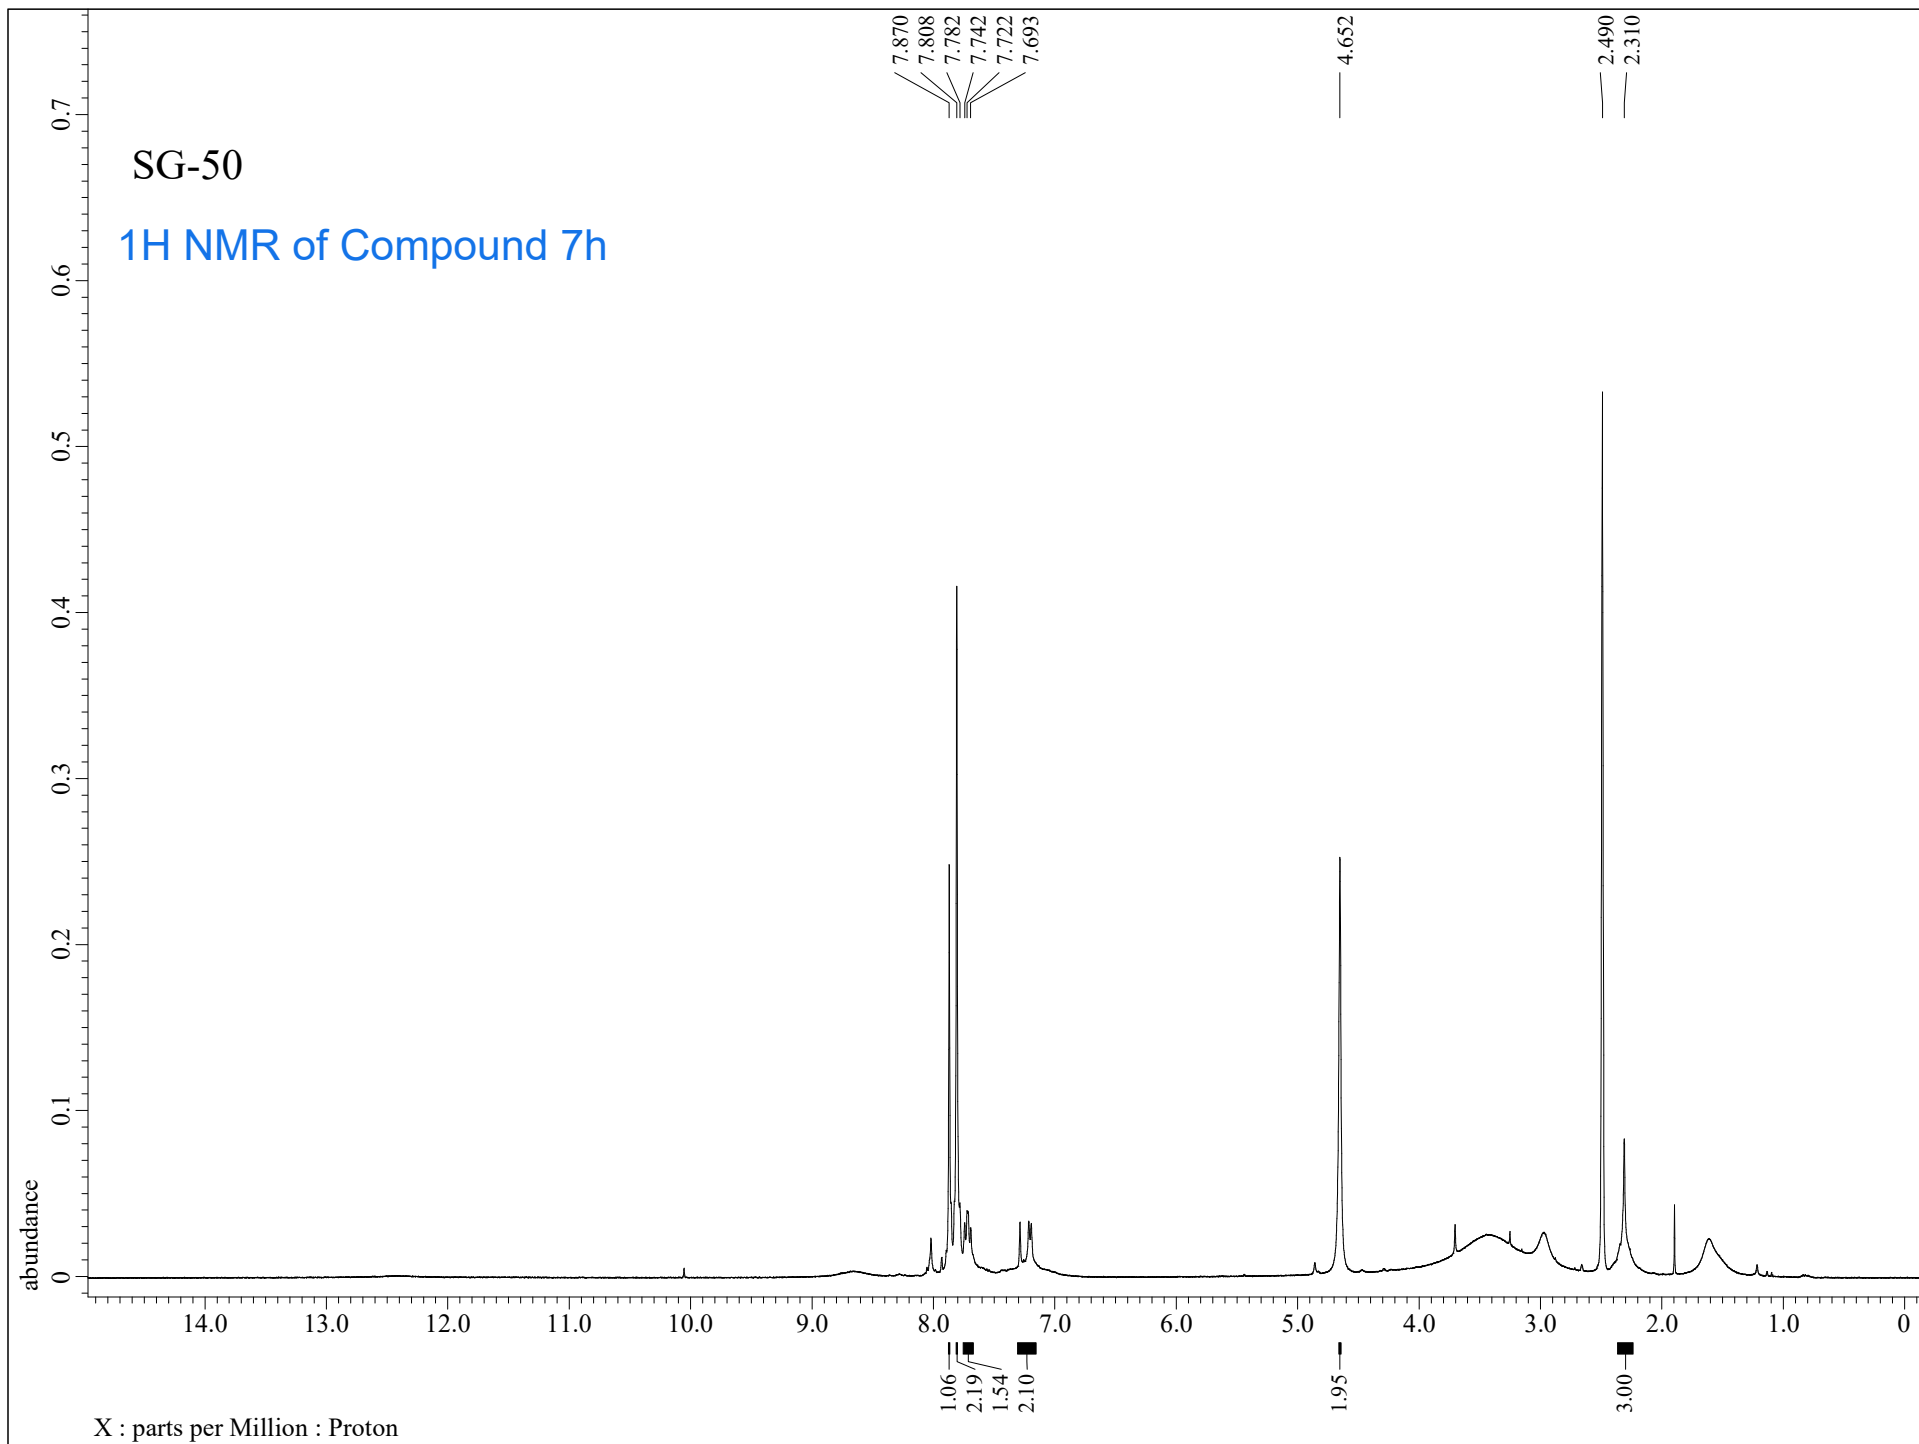

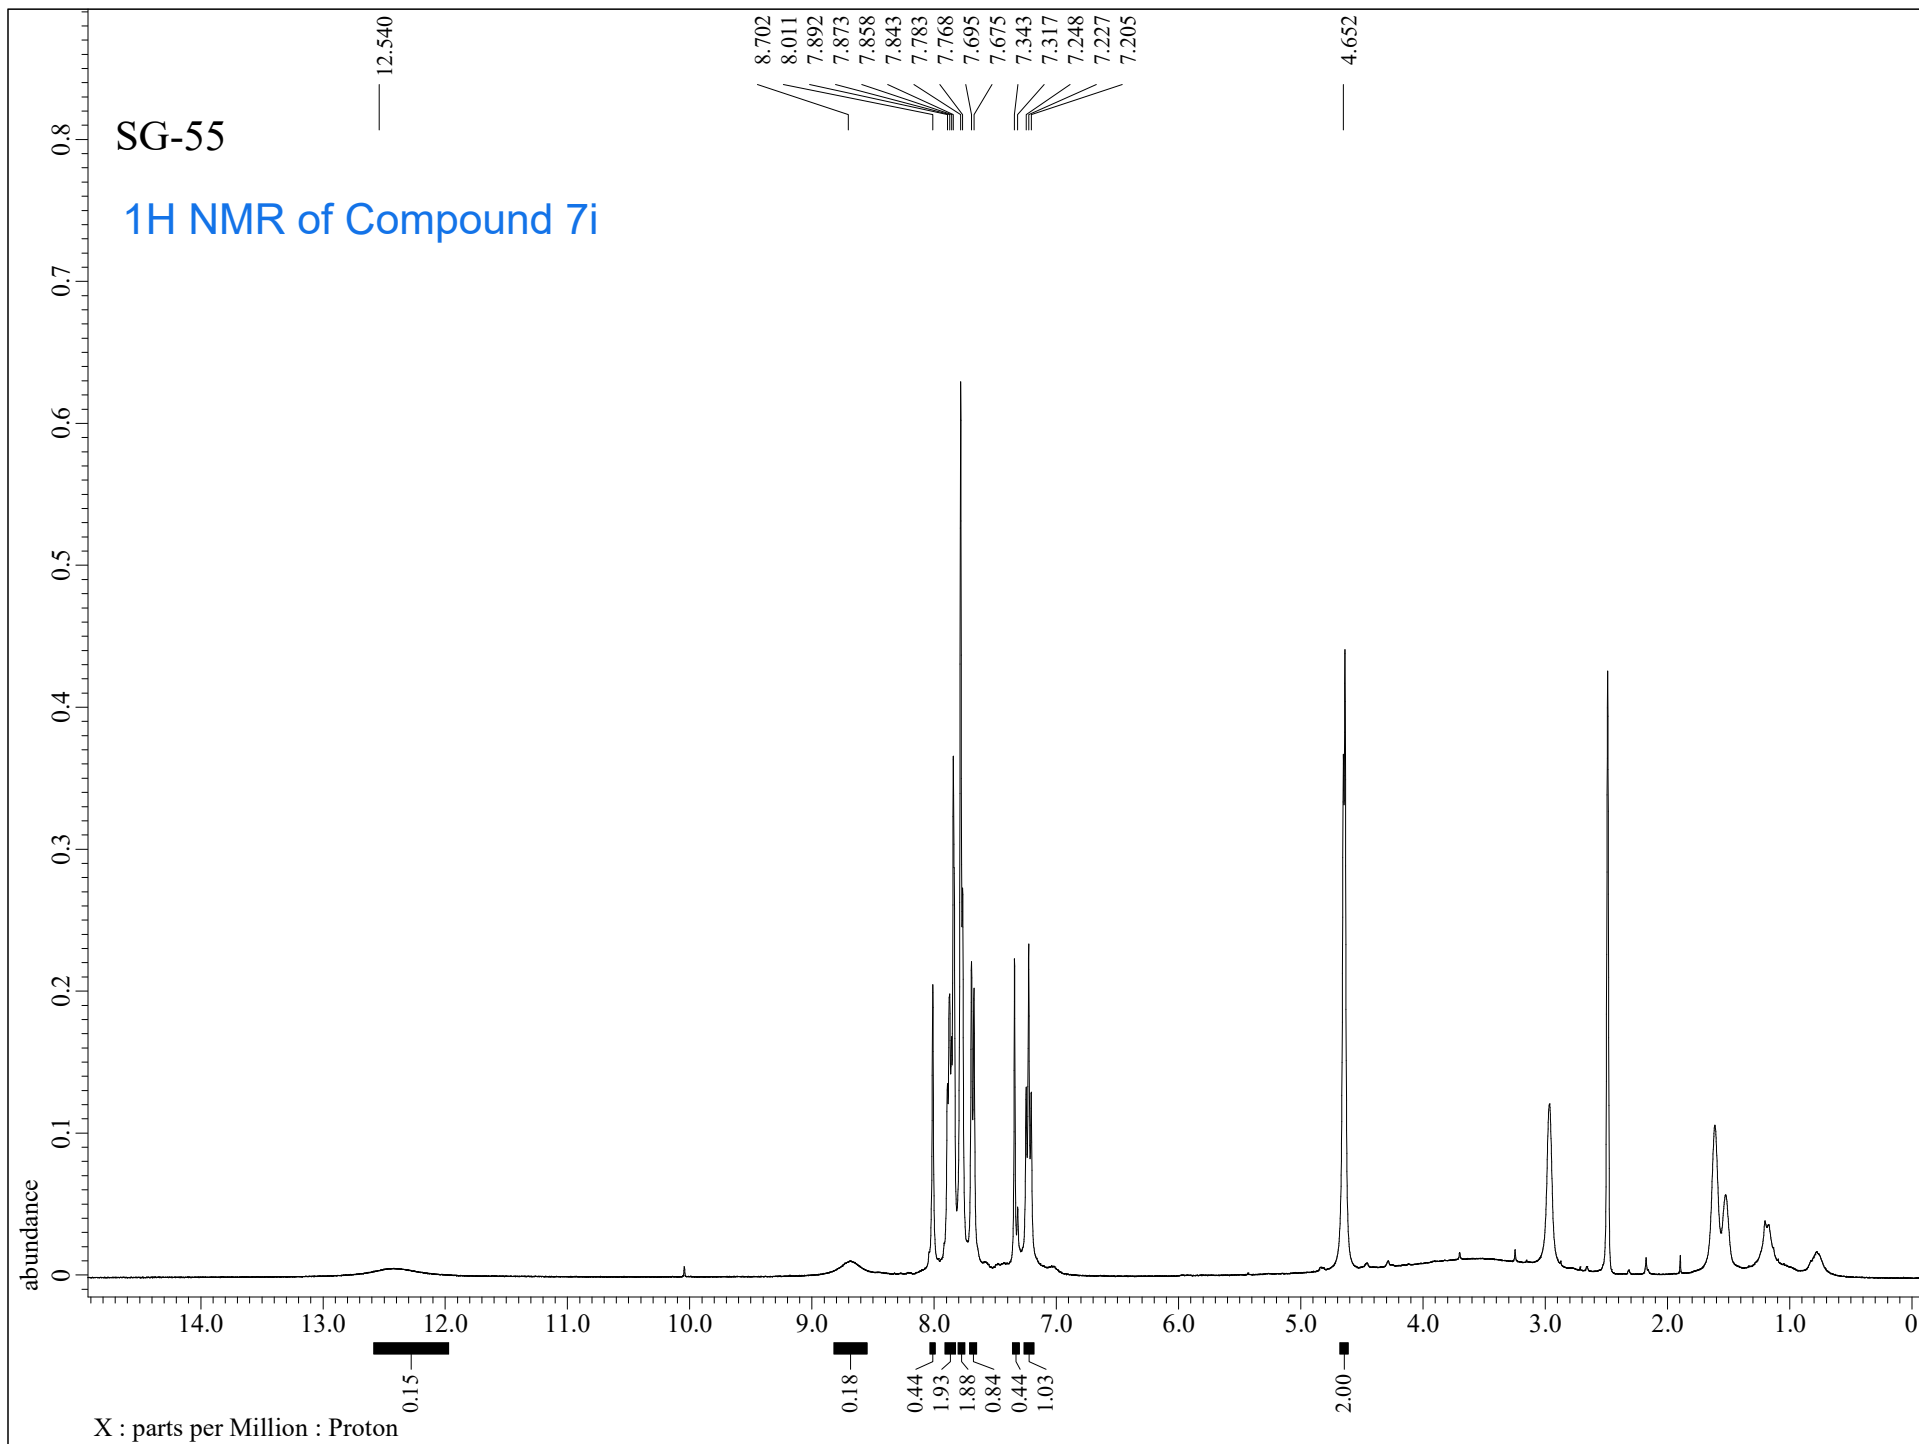

# 19F NMR of Compound 7i

SG-55

Sample Name:

SG-55

Data Collected on:

localhost.localdomain-vnmrs400

Archive directory:

/home/vnmr1/vnmrsys/data/2024/Oct/20241023

Sample directory:

SG-55\_20241023\_01

FidFile: SG-55-FLUORINE\_02

Pulse Sequence: FLUORINE (s2pul)

Solvent: dmsd

Data collected on: Oct 23 2024

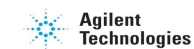

-114.537

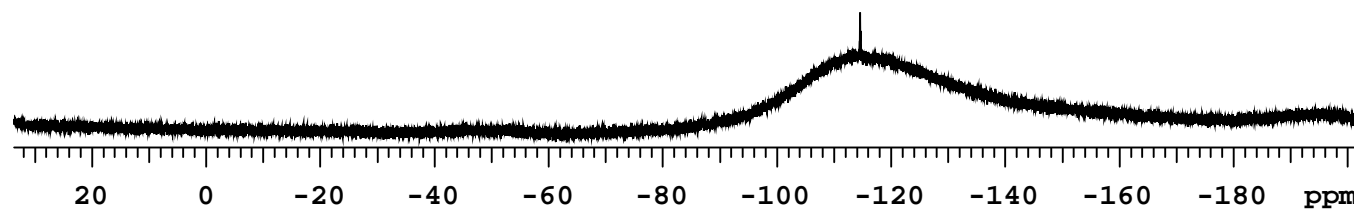

Plotname: SG-55-FLUORINE\_02\_plot01--

**INTEGRAL VALUES**

| Integral | start(ppm) | end      | value   |
|----------|------------|----------|---------|
| 1        | 33.656     | -203.653 | 100.000 |

**PEAK FREQUENCIES**

| index | freq(ppm) | intensity |
|-------|-----------|-----------|
| 1     | -114.537  | 15.8254   |

SG-51

1H NMR of Compound 7j

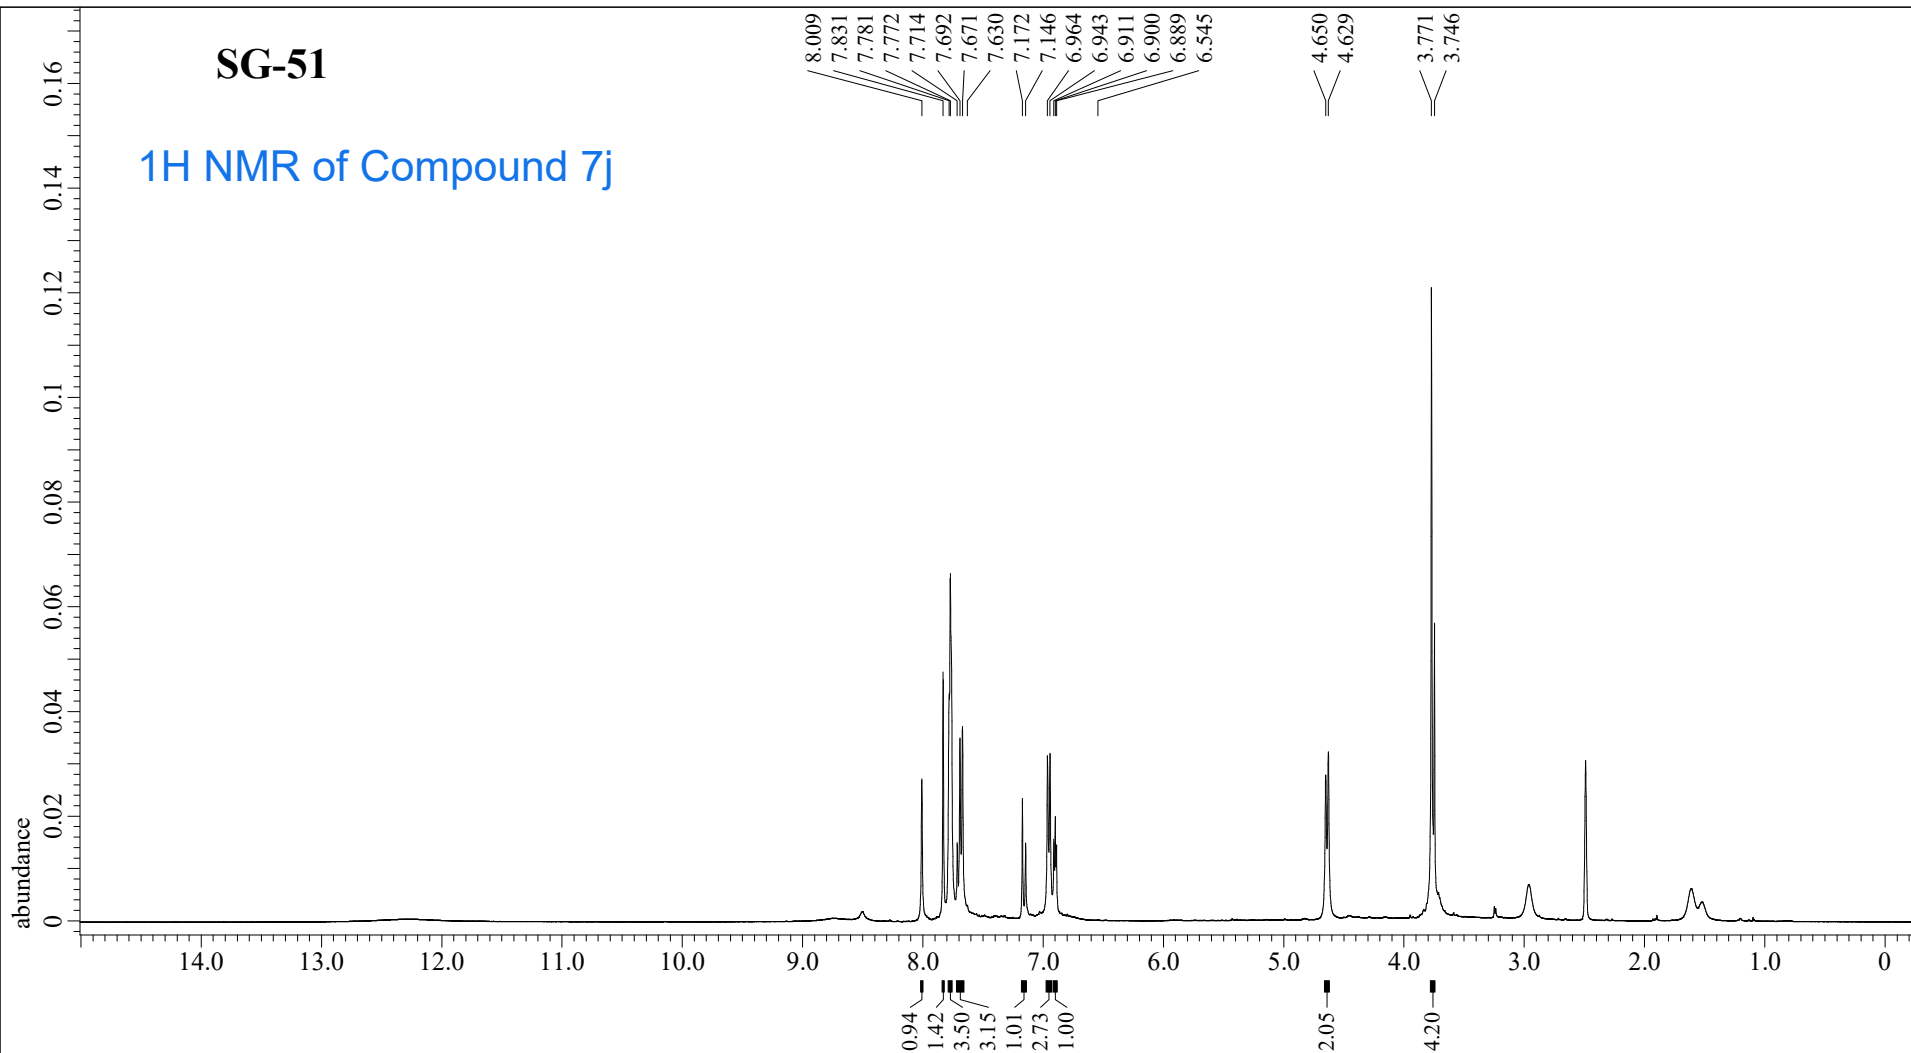

X : parts per Million : Proton

Filename = SR\_SG 51\_Proton-1-2.j  
 Author = default  
 Experiment = proton.jpg  
 Sample\_Id = SR/SG 51  
 Solvent = DMSO-D6  
 Creation\_Time = 8-MAY-2024 18:38:36  
 Revision\_Time = 10-MAY-2024 19:17:55  
 Current\_Time = 10-MAY-2024 19:18:10  
 Comment = single\_pulse  
 Data\_Format = 1D COMPLEX  
 Dim\_Size = 52429  
 Dim\_Title = Proton  
 Dim\_Units = [ppm]  
 Dimensions = X  
 Spectrometer = DELTA2\_NMR

Field\_Strength = 9.39094035 [T] (400 [MH])  
 X\_Acq\_Duration = 1.63577856 [s]  
 X\_Domain = 1H  
 X\_Freq = 399.83219794 [MHz]  
 X\_Offset = 5 [ppm]  
 X\_Points = 16384  
 X\_Prescans = 1  
 X\_Resolution = 0.61132969 [Hz]  
 X\_Sweep = 10.01602564 [kHz]  
 X\_Sweep\_Clipped = 8.01282051 [kHz]  
 Irr\_Domain = Proton  
 Irr\_Freq = 399.83219794 [MHz]  
 Irr\_Offset = 5 [ppm]  
 Tri\_Domain = Proton  
 Tri\_Freq = 399.83219794 [MHz]  
 Tri\_Offset = 5 [ppm]  
 Blanking = 2 [us]

---- PROCESSING PARAMETERS ----  
 sexp( 0.4 [Hz], 0.0 [s] )  
 trapezoid( 0 [%], 0 [%], 80 [%], 100 [%] )  
 zerofill( 4 )  
 fft( 1, TRUE, TRUE )  
 machinephase  
 ppm  
 Derived from: SR\_SG 51\_Proton-1-1.jdf

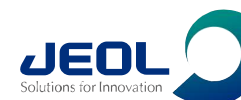



SG-49

1H NMR of Compound 7k

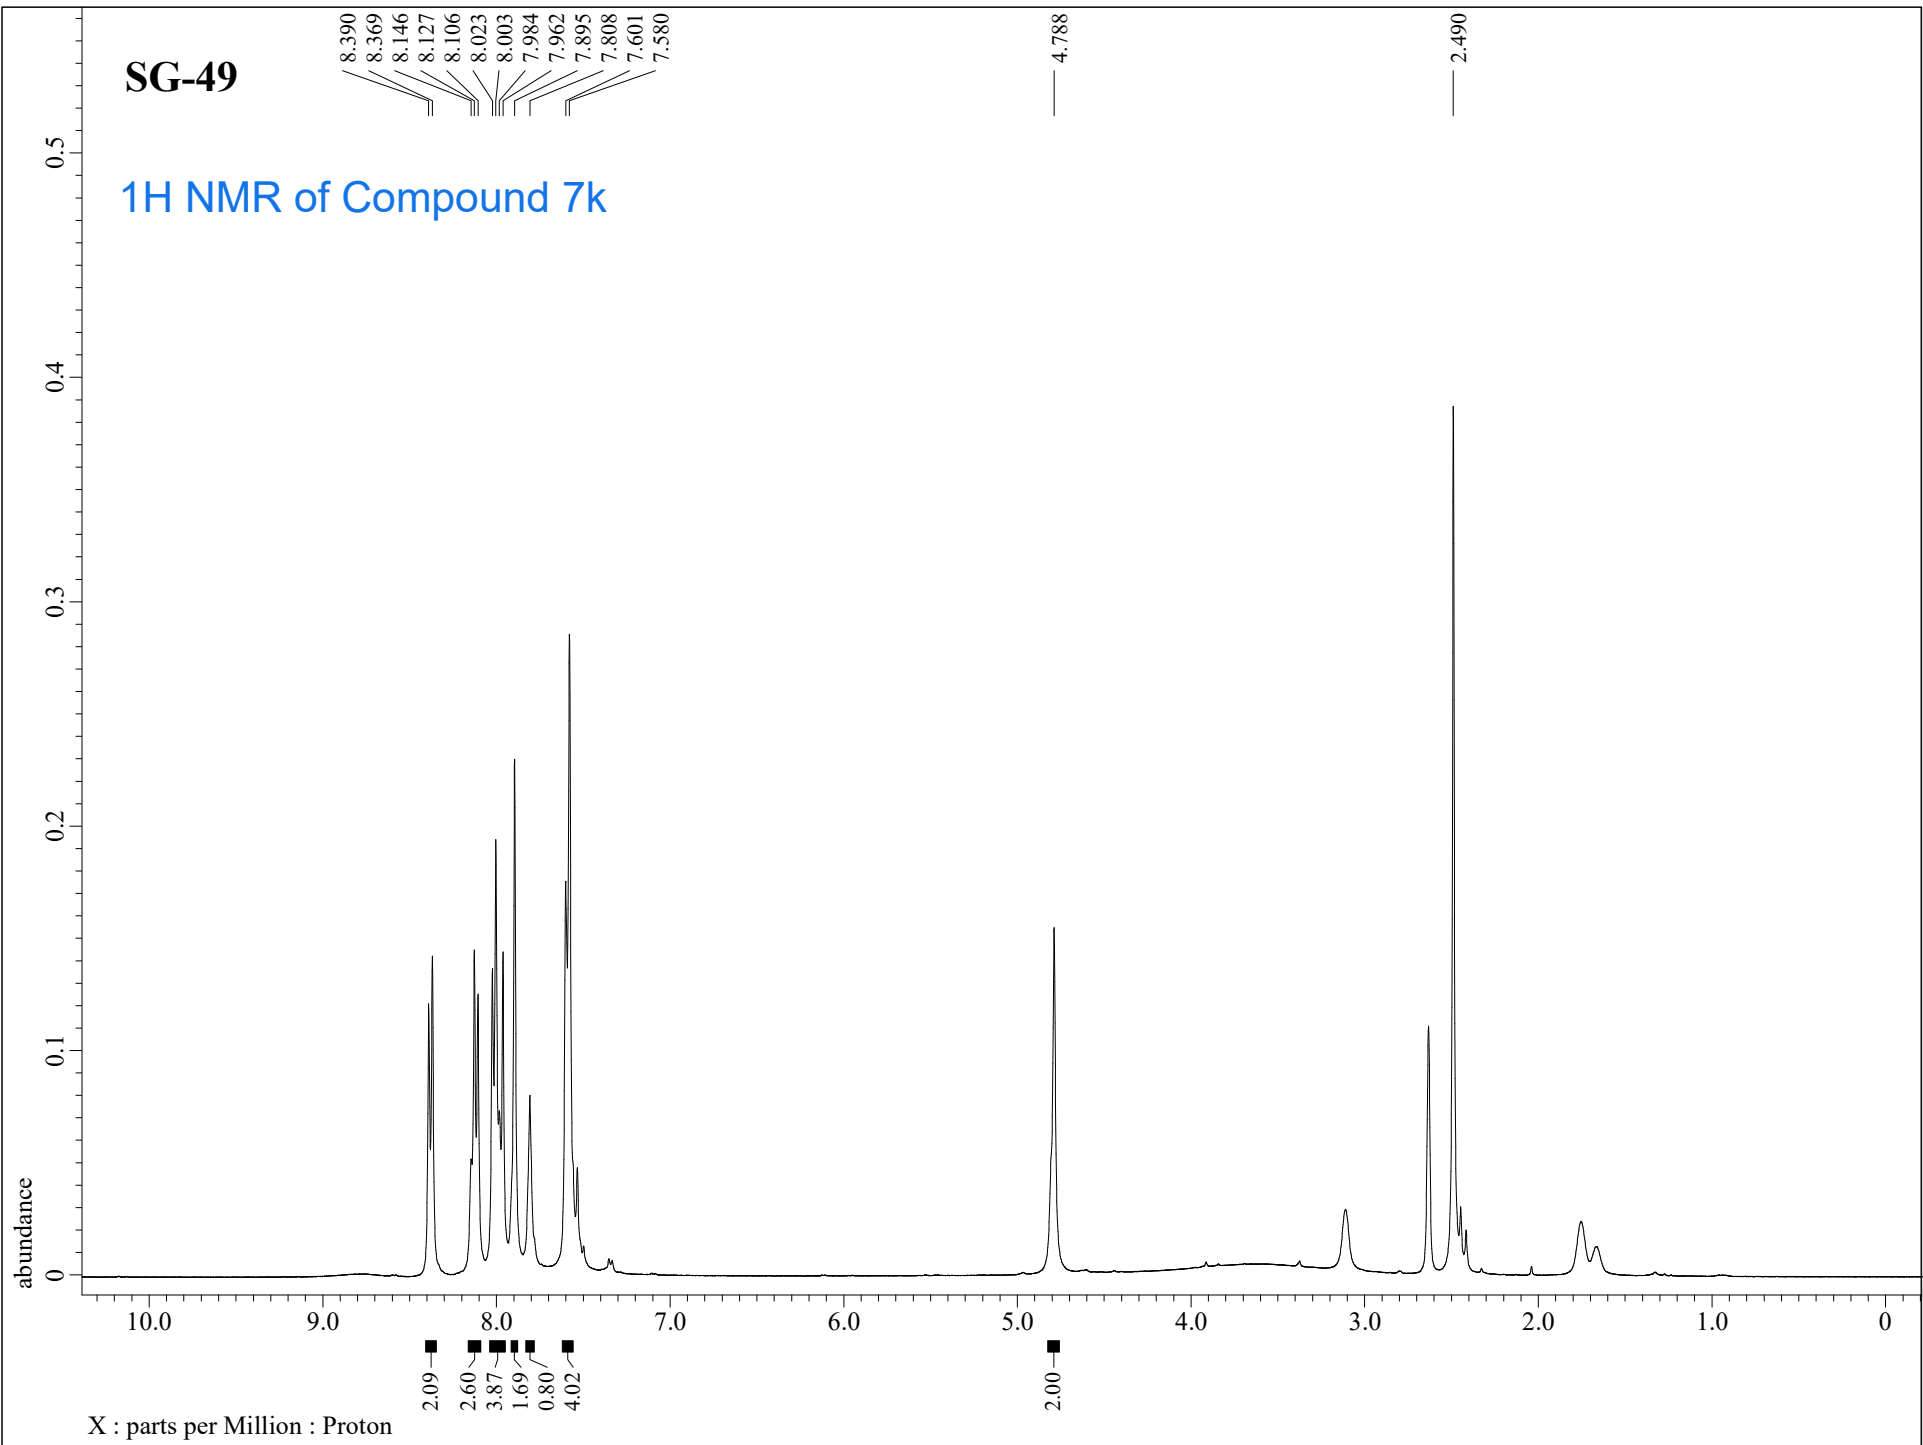

SG-52

1H NMR of Compound 7I

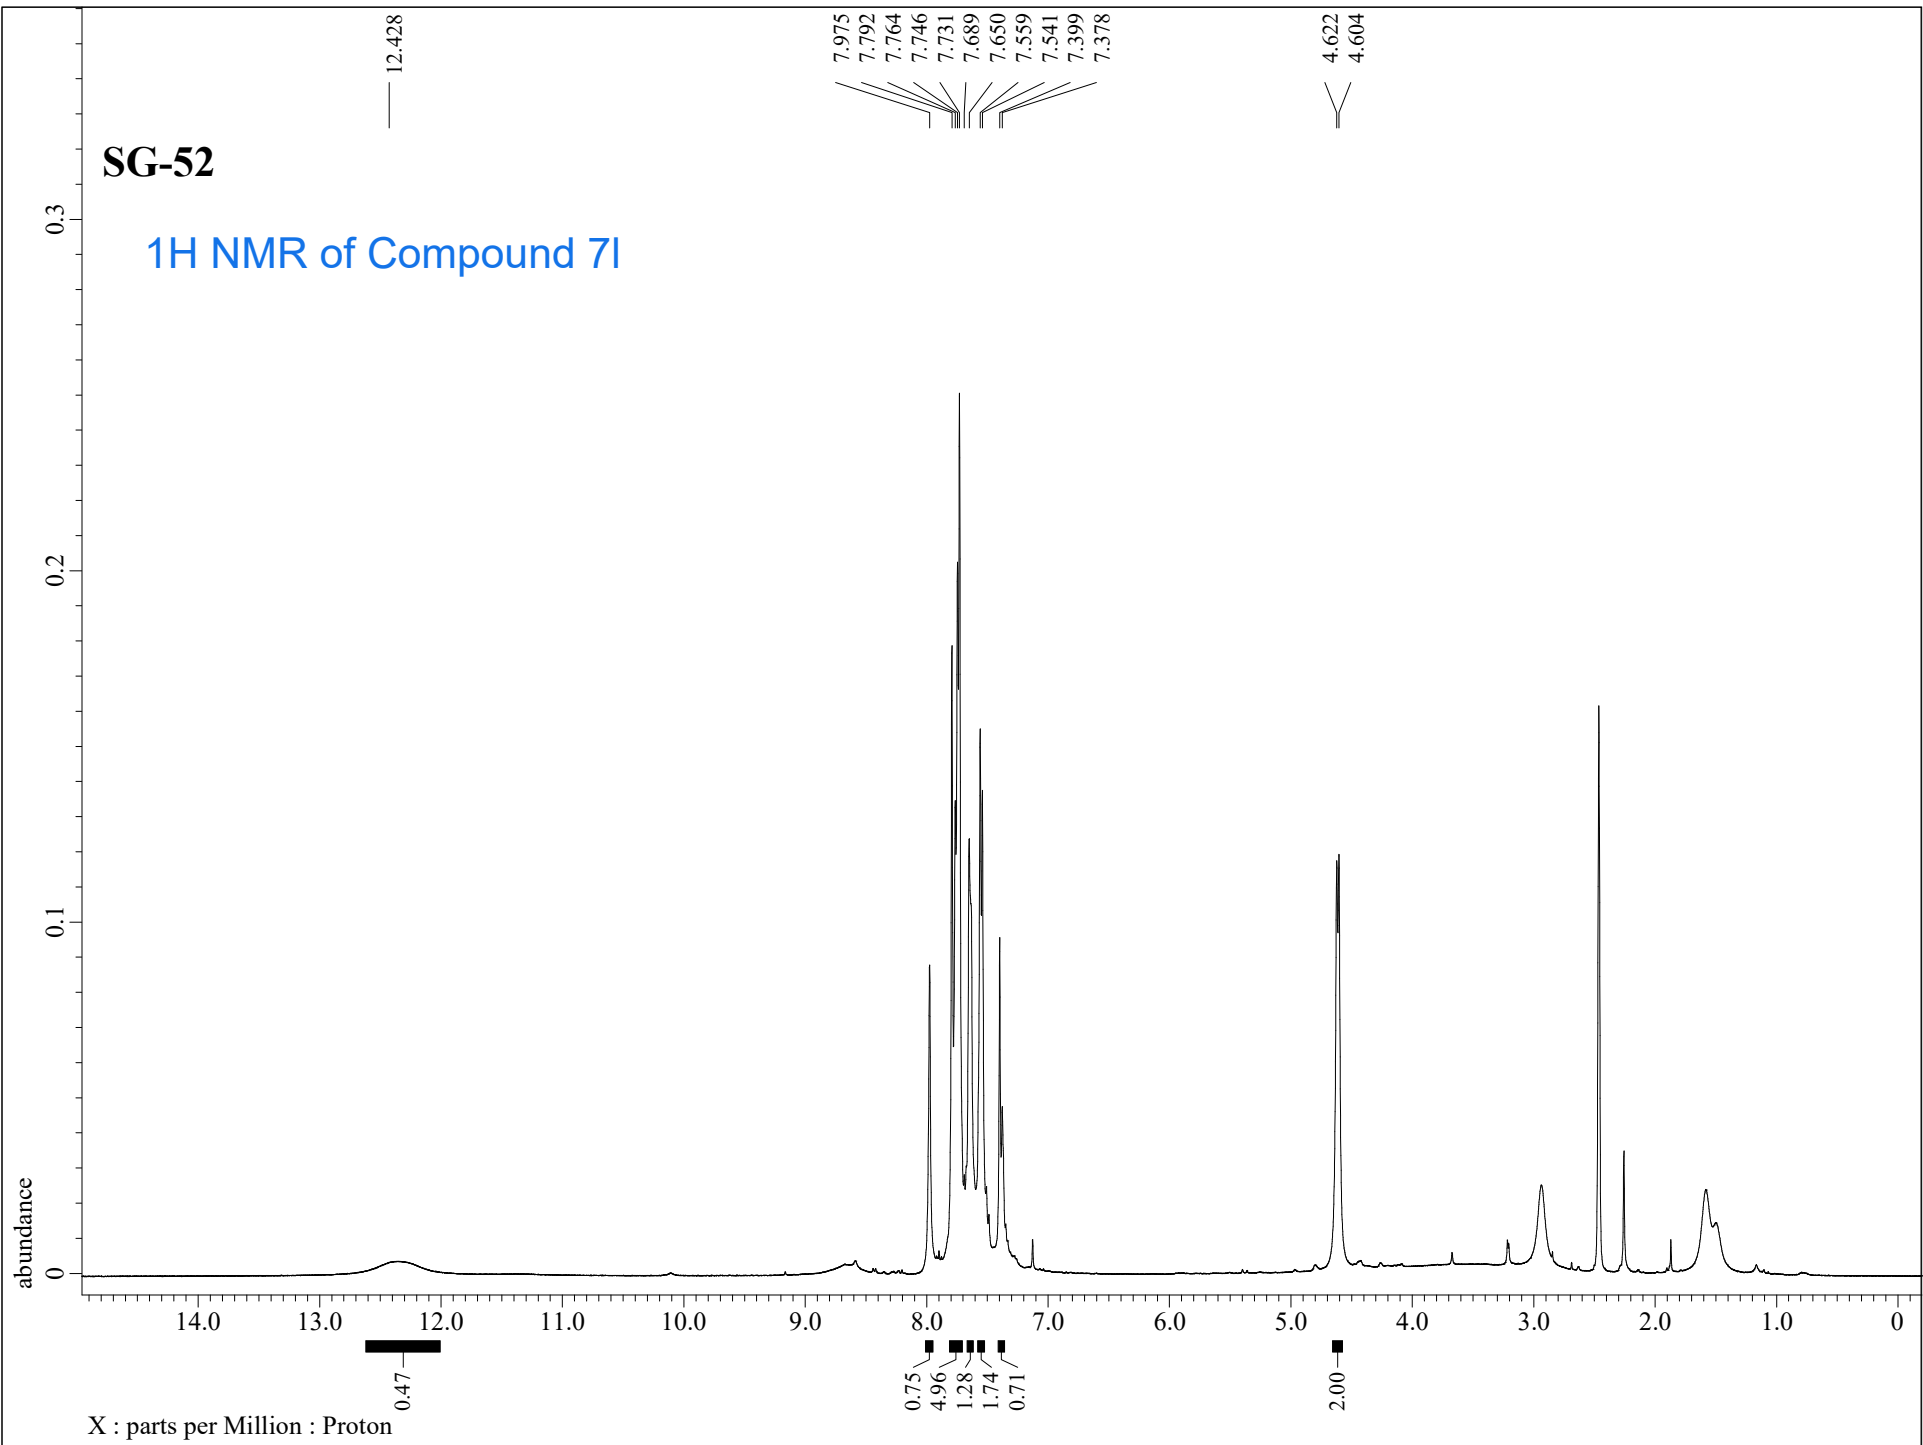

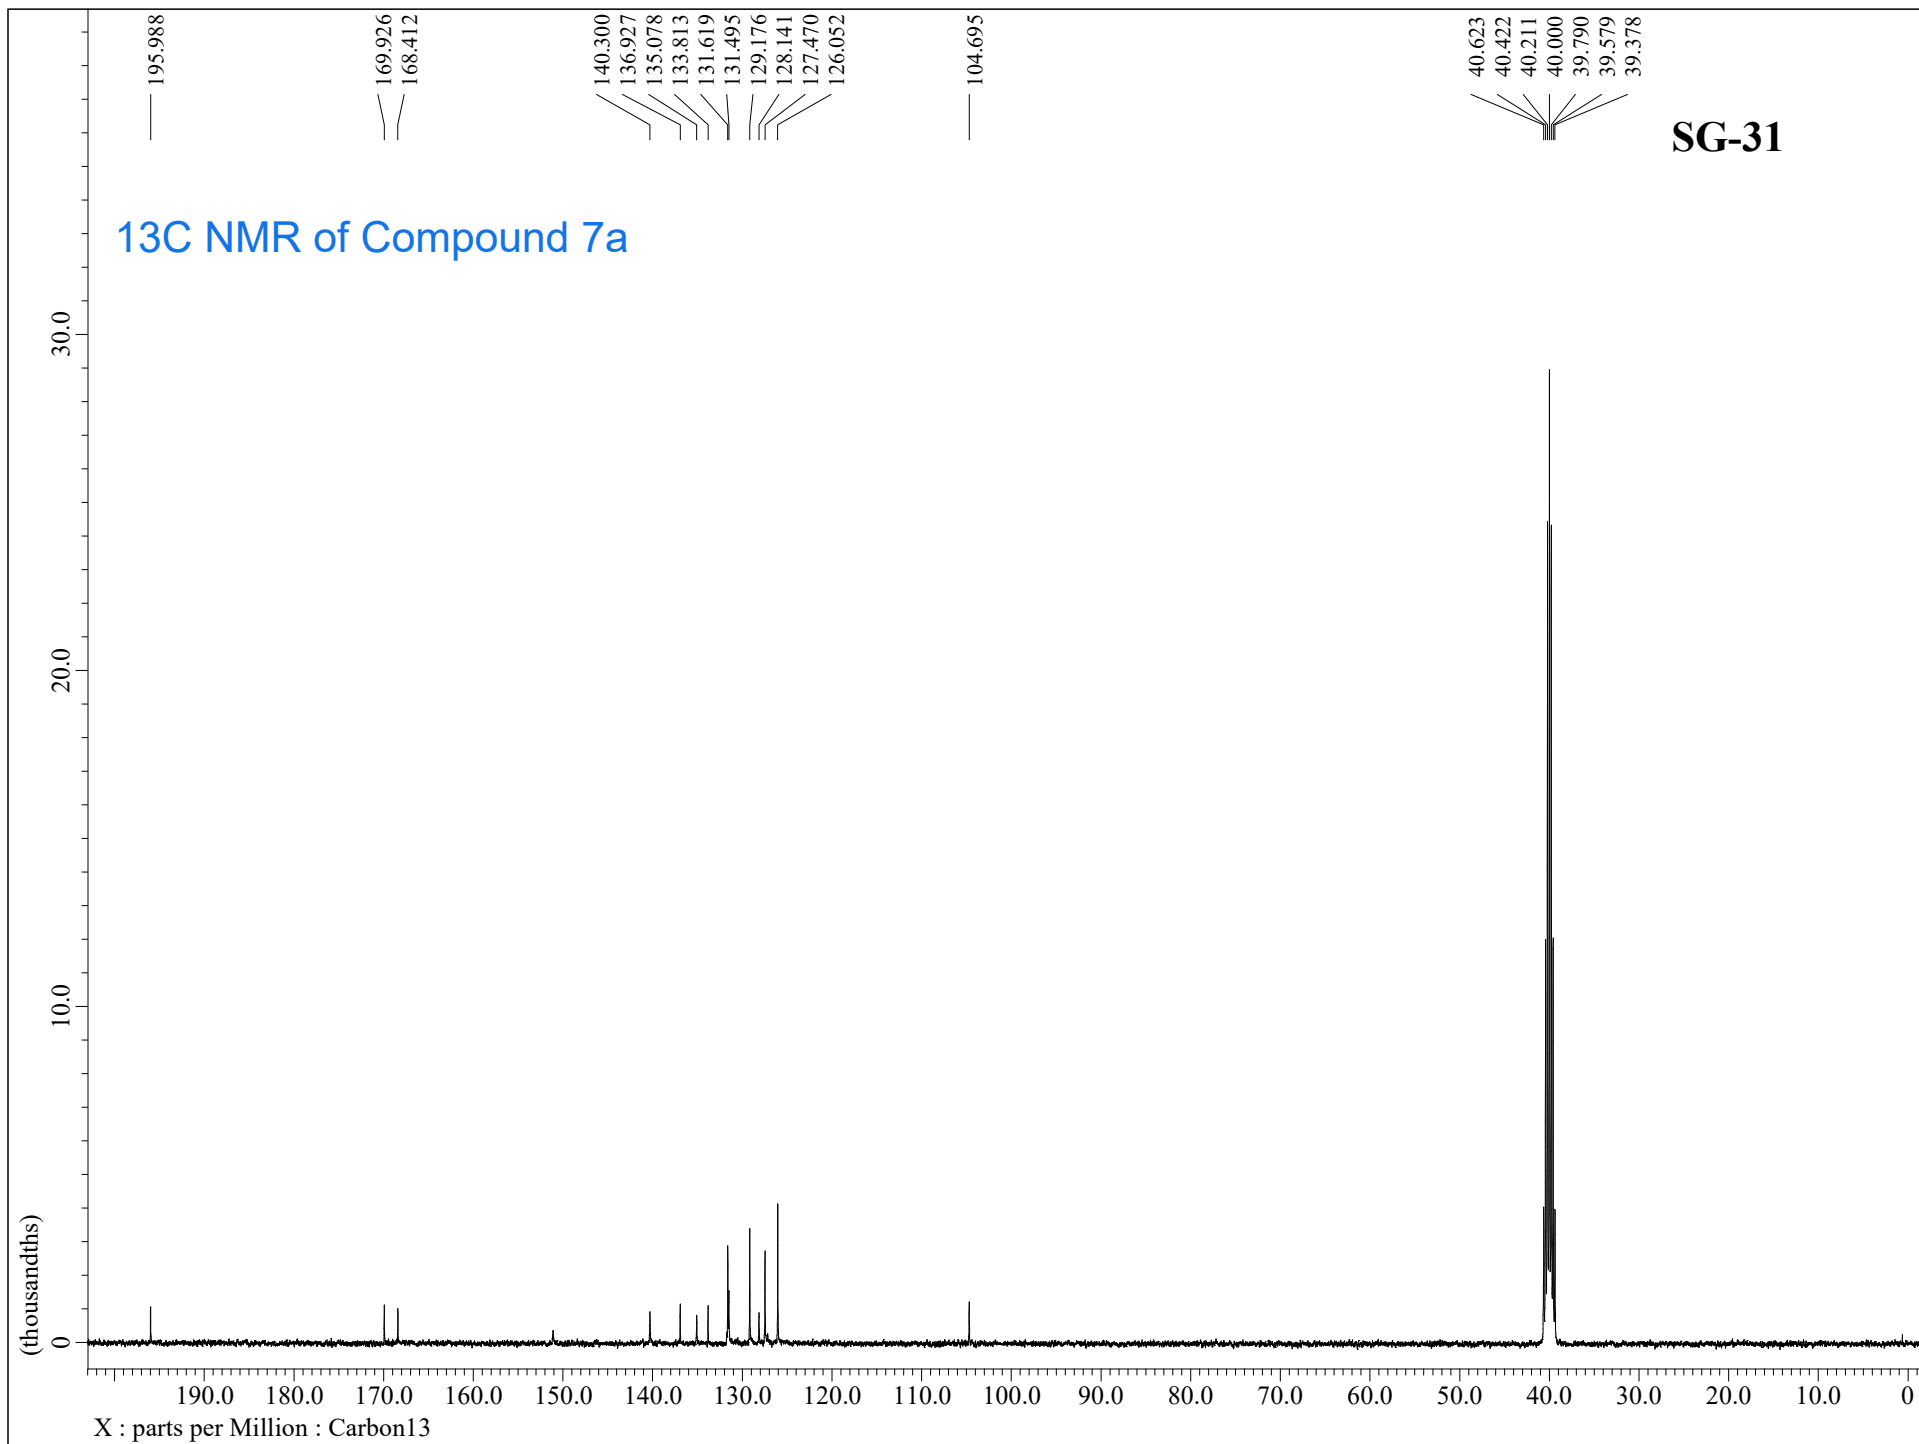

**SG-31**

SG-17

**<sup>13</sup>C NMR of Compound 7b**

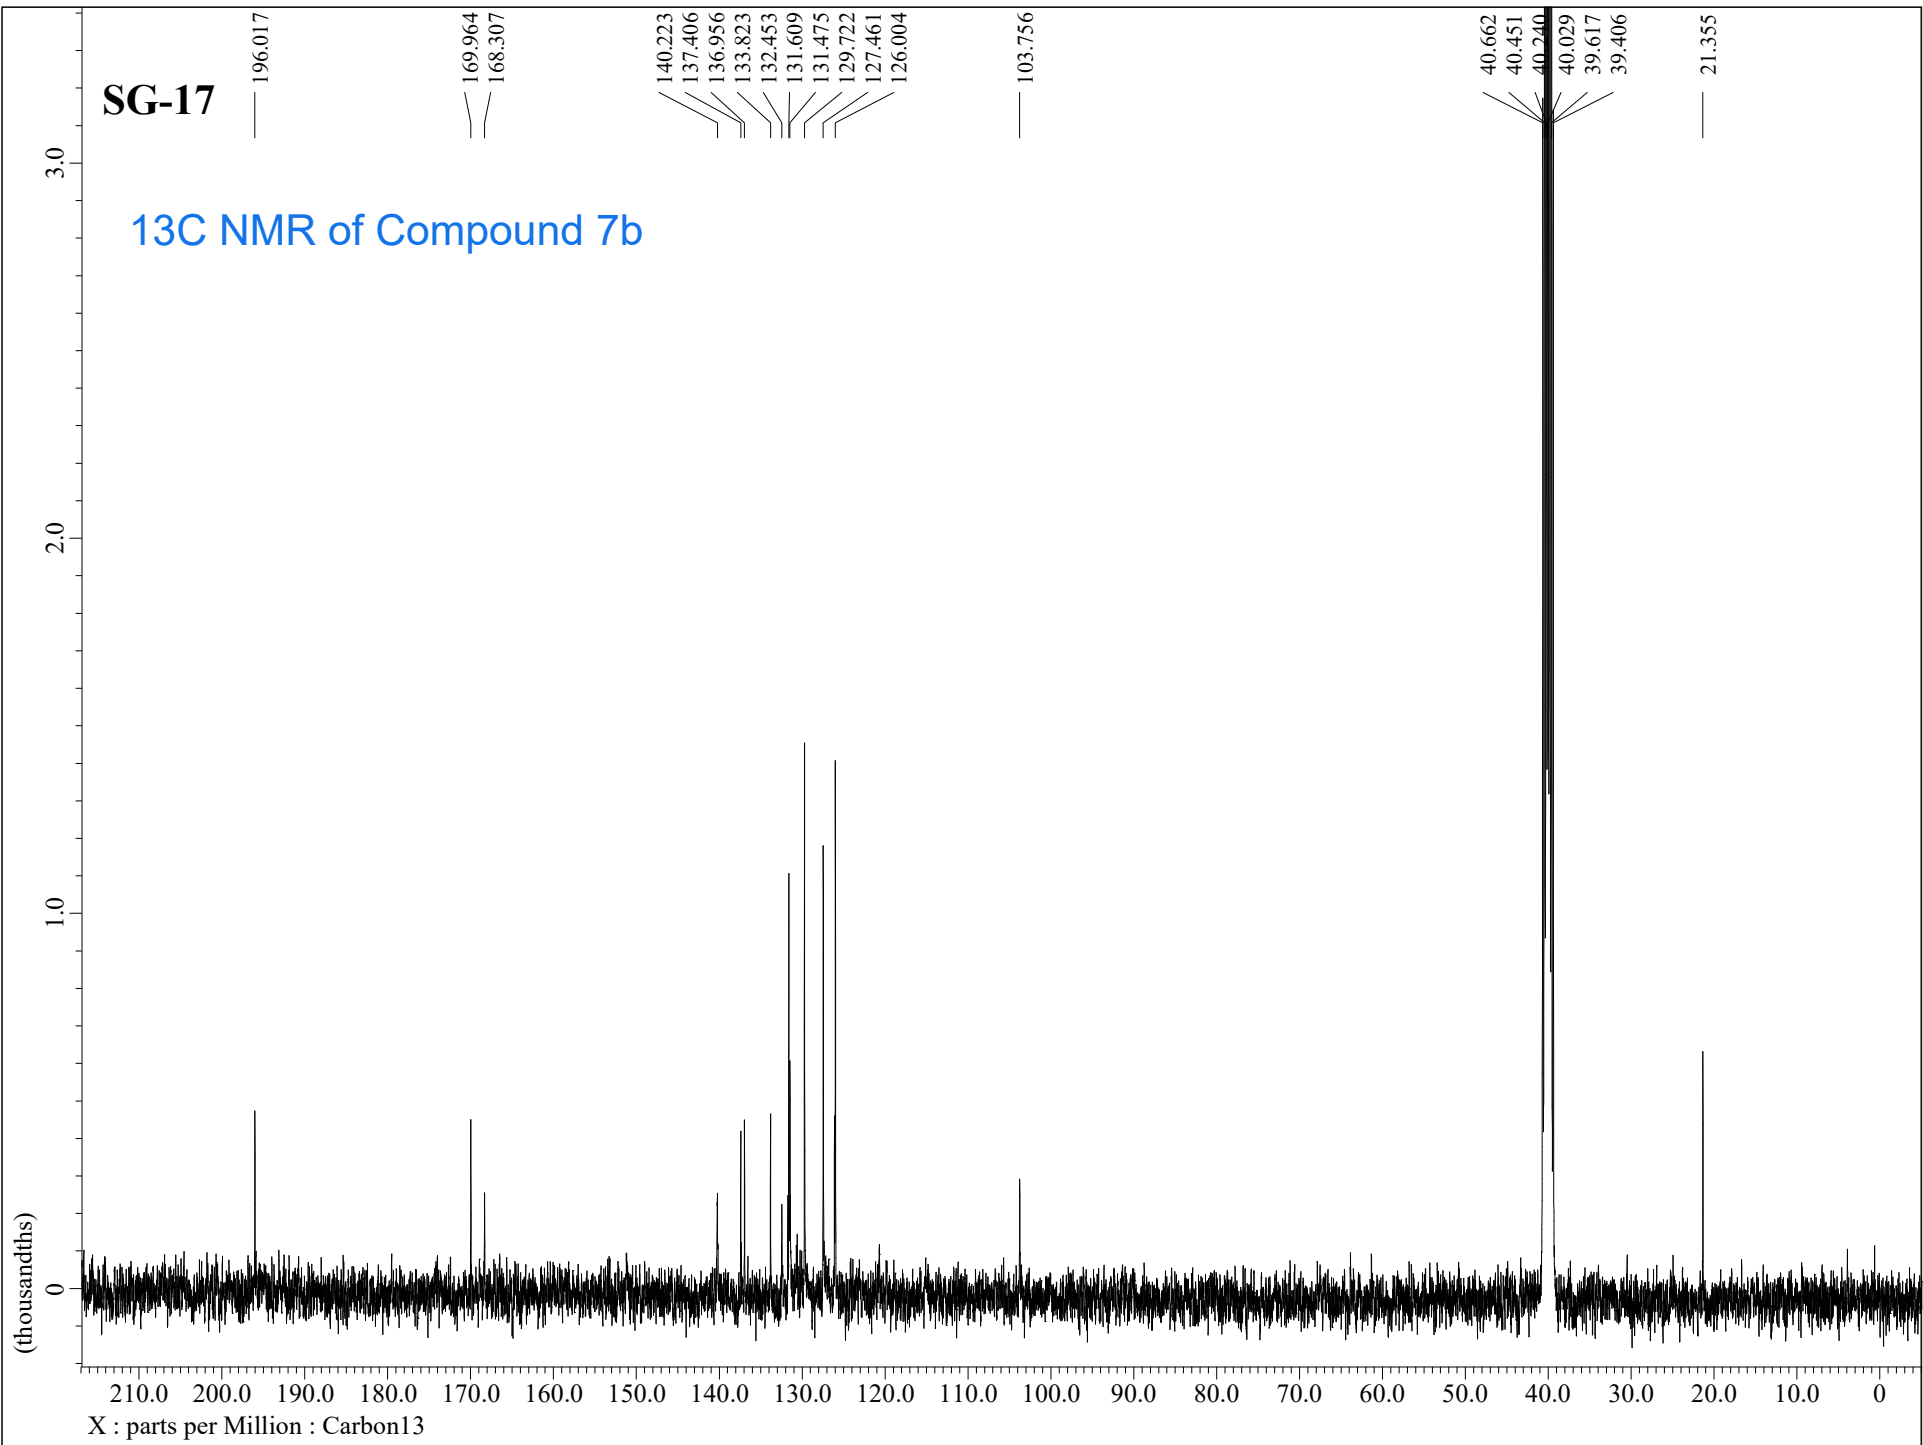

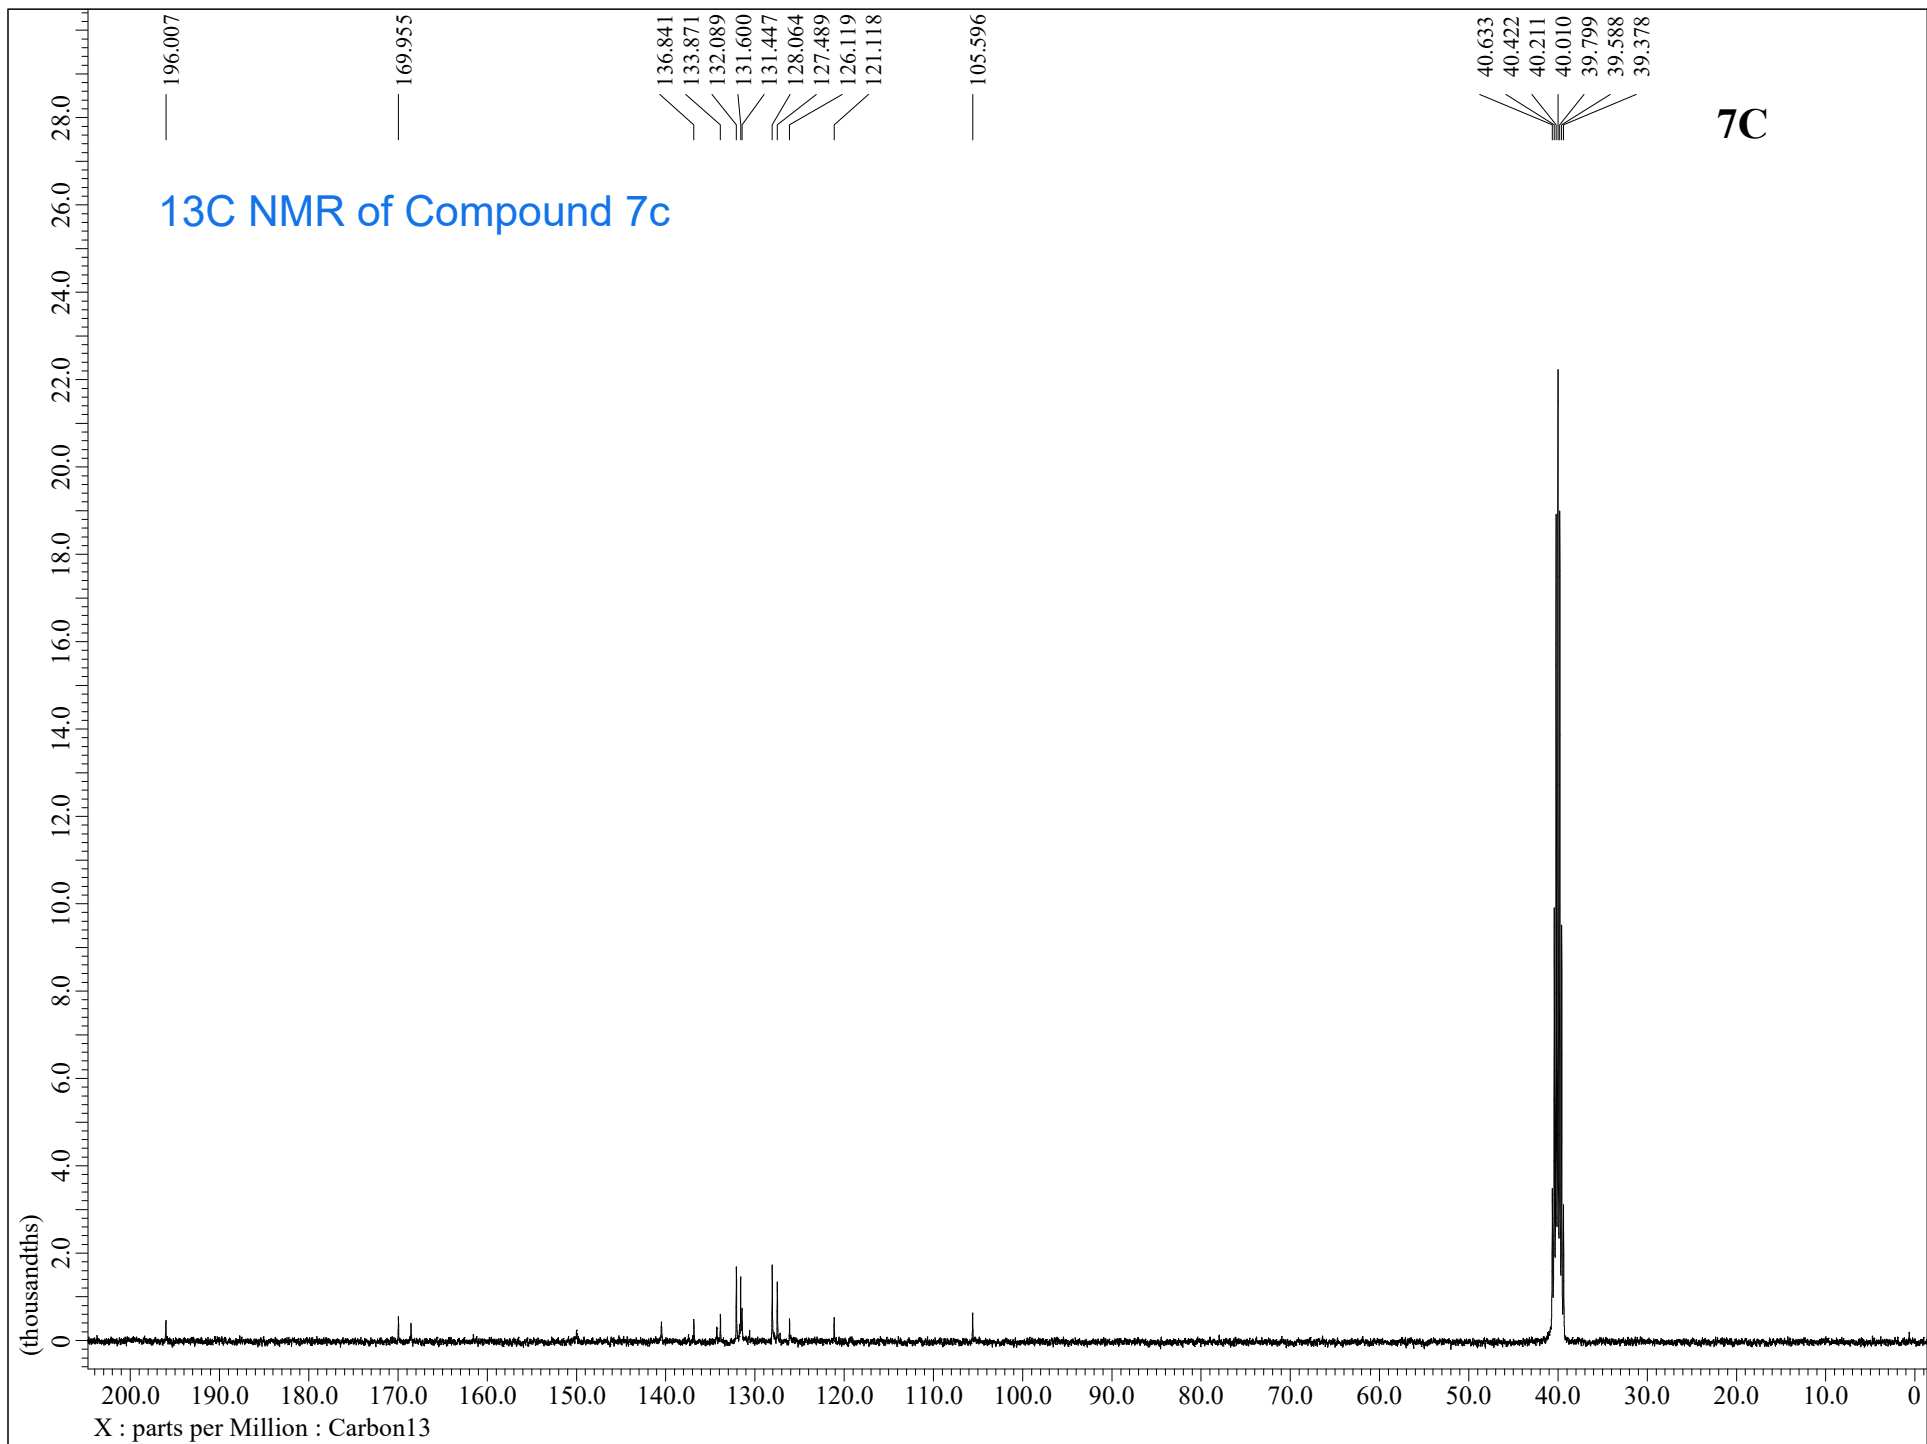

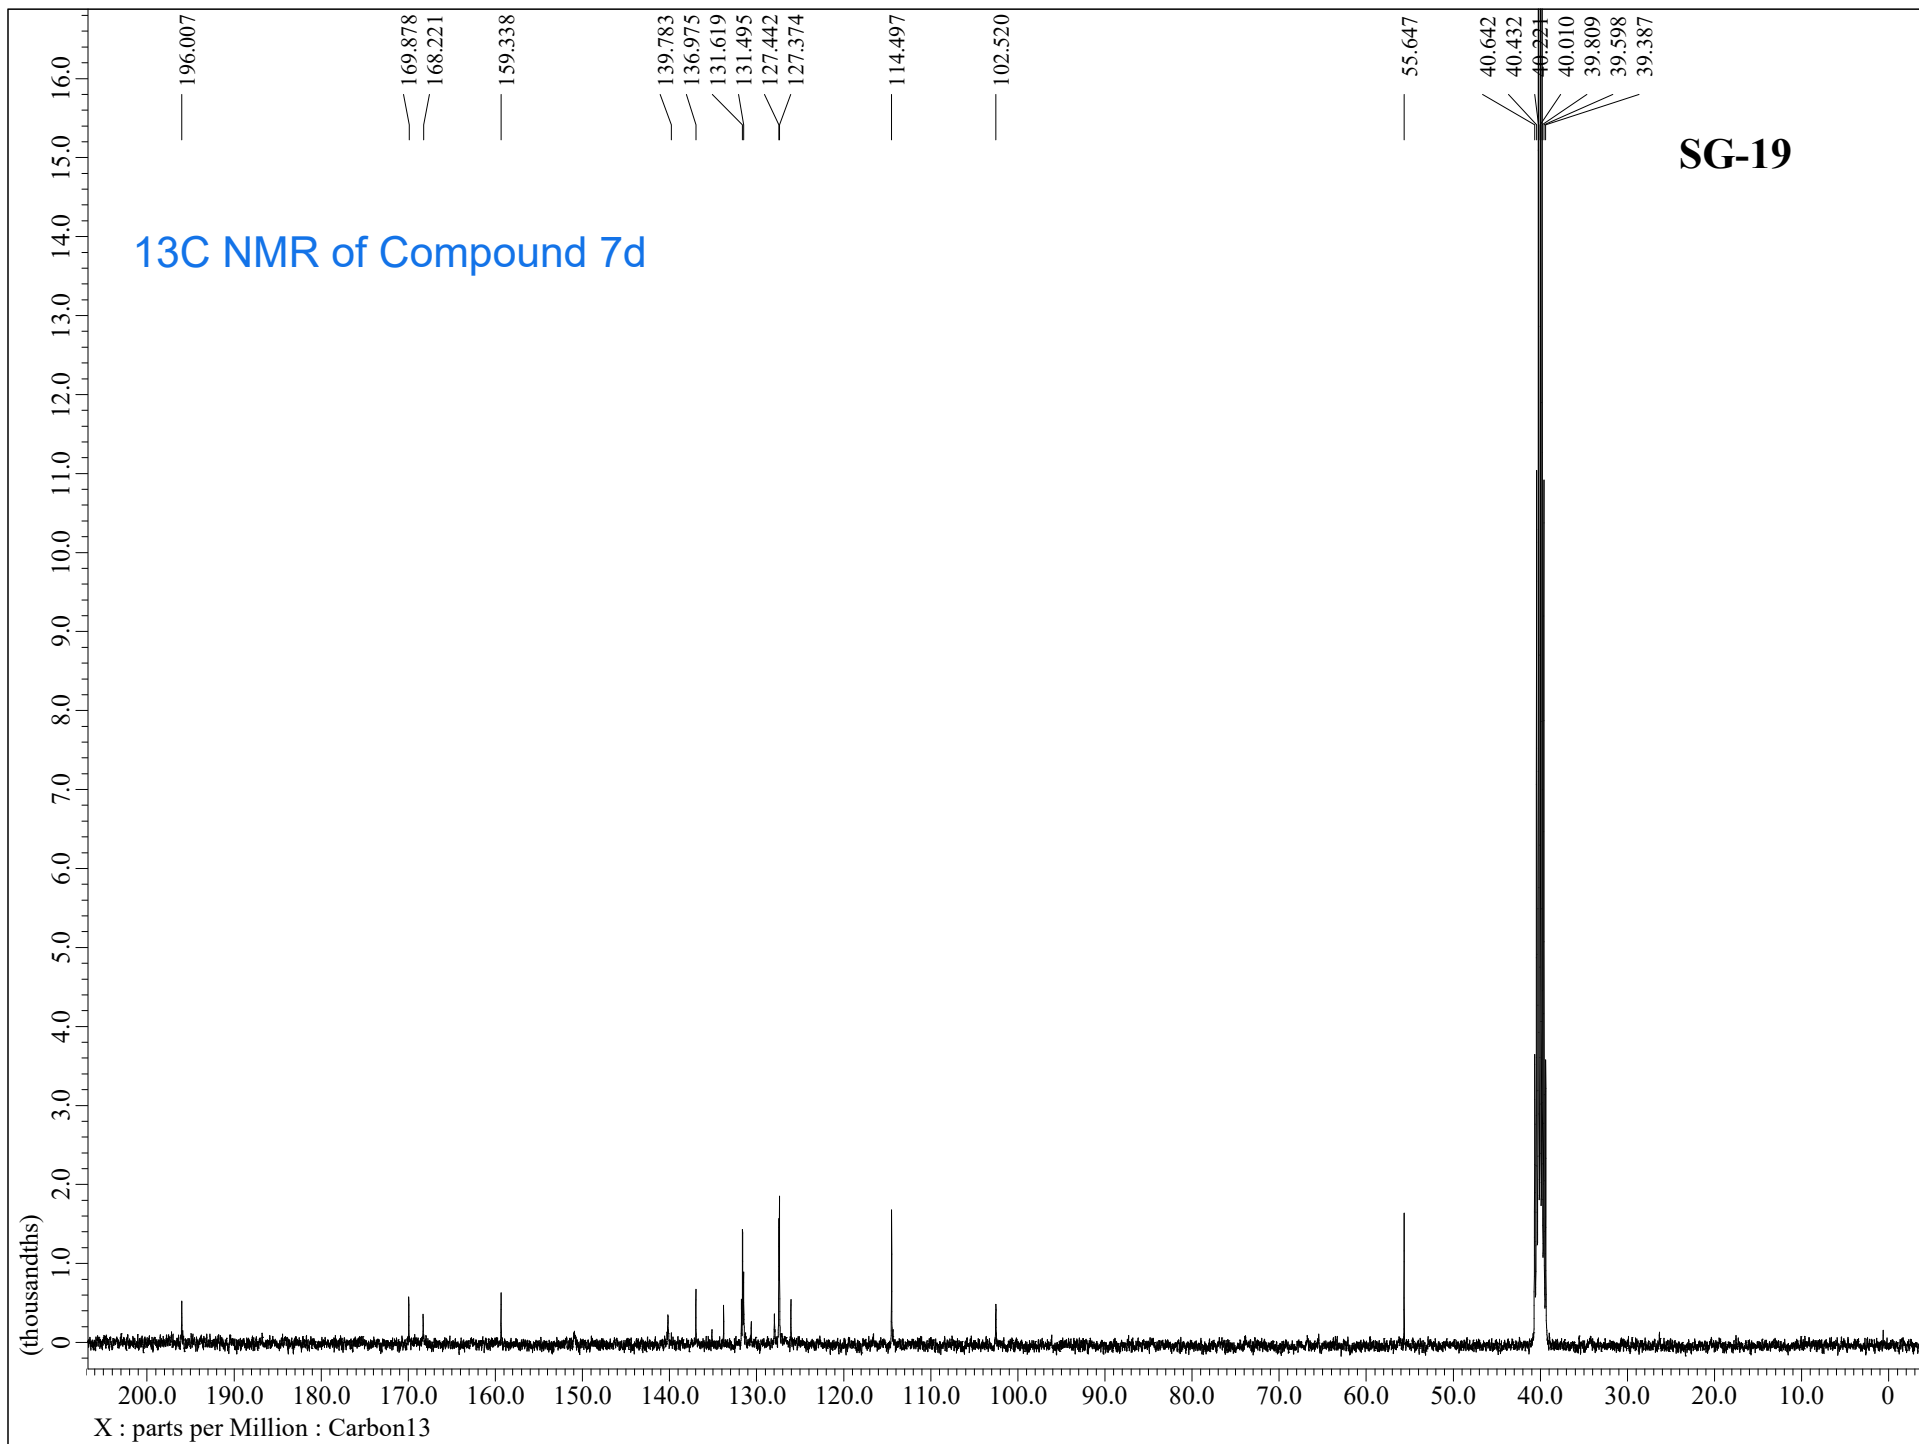

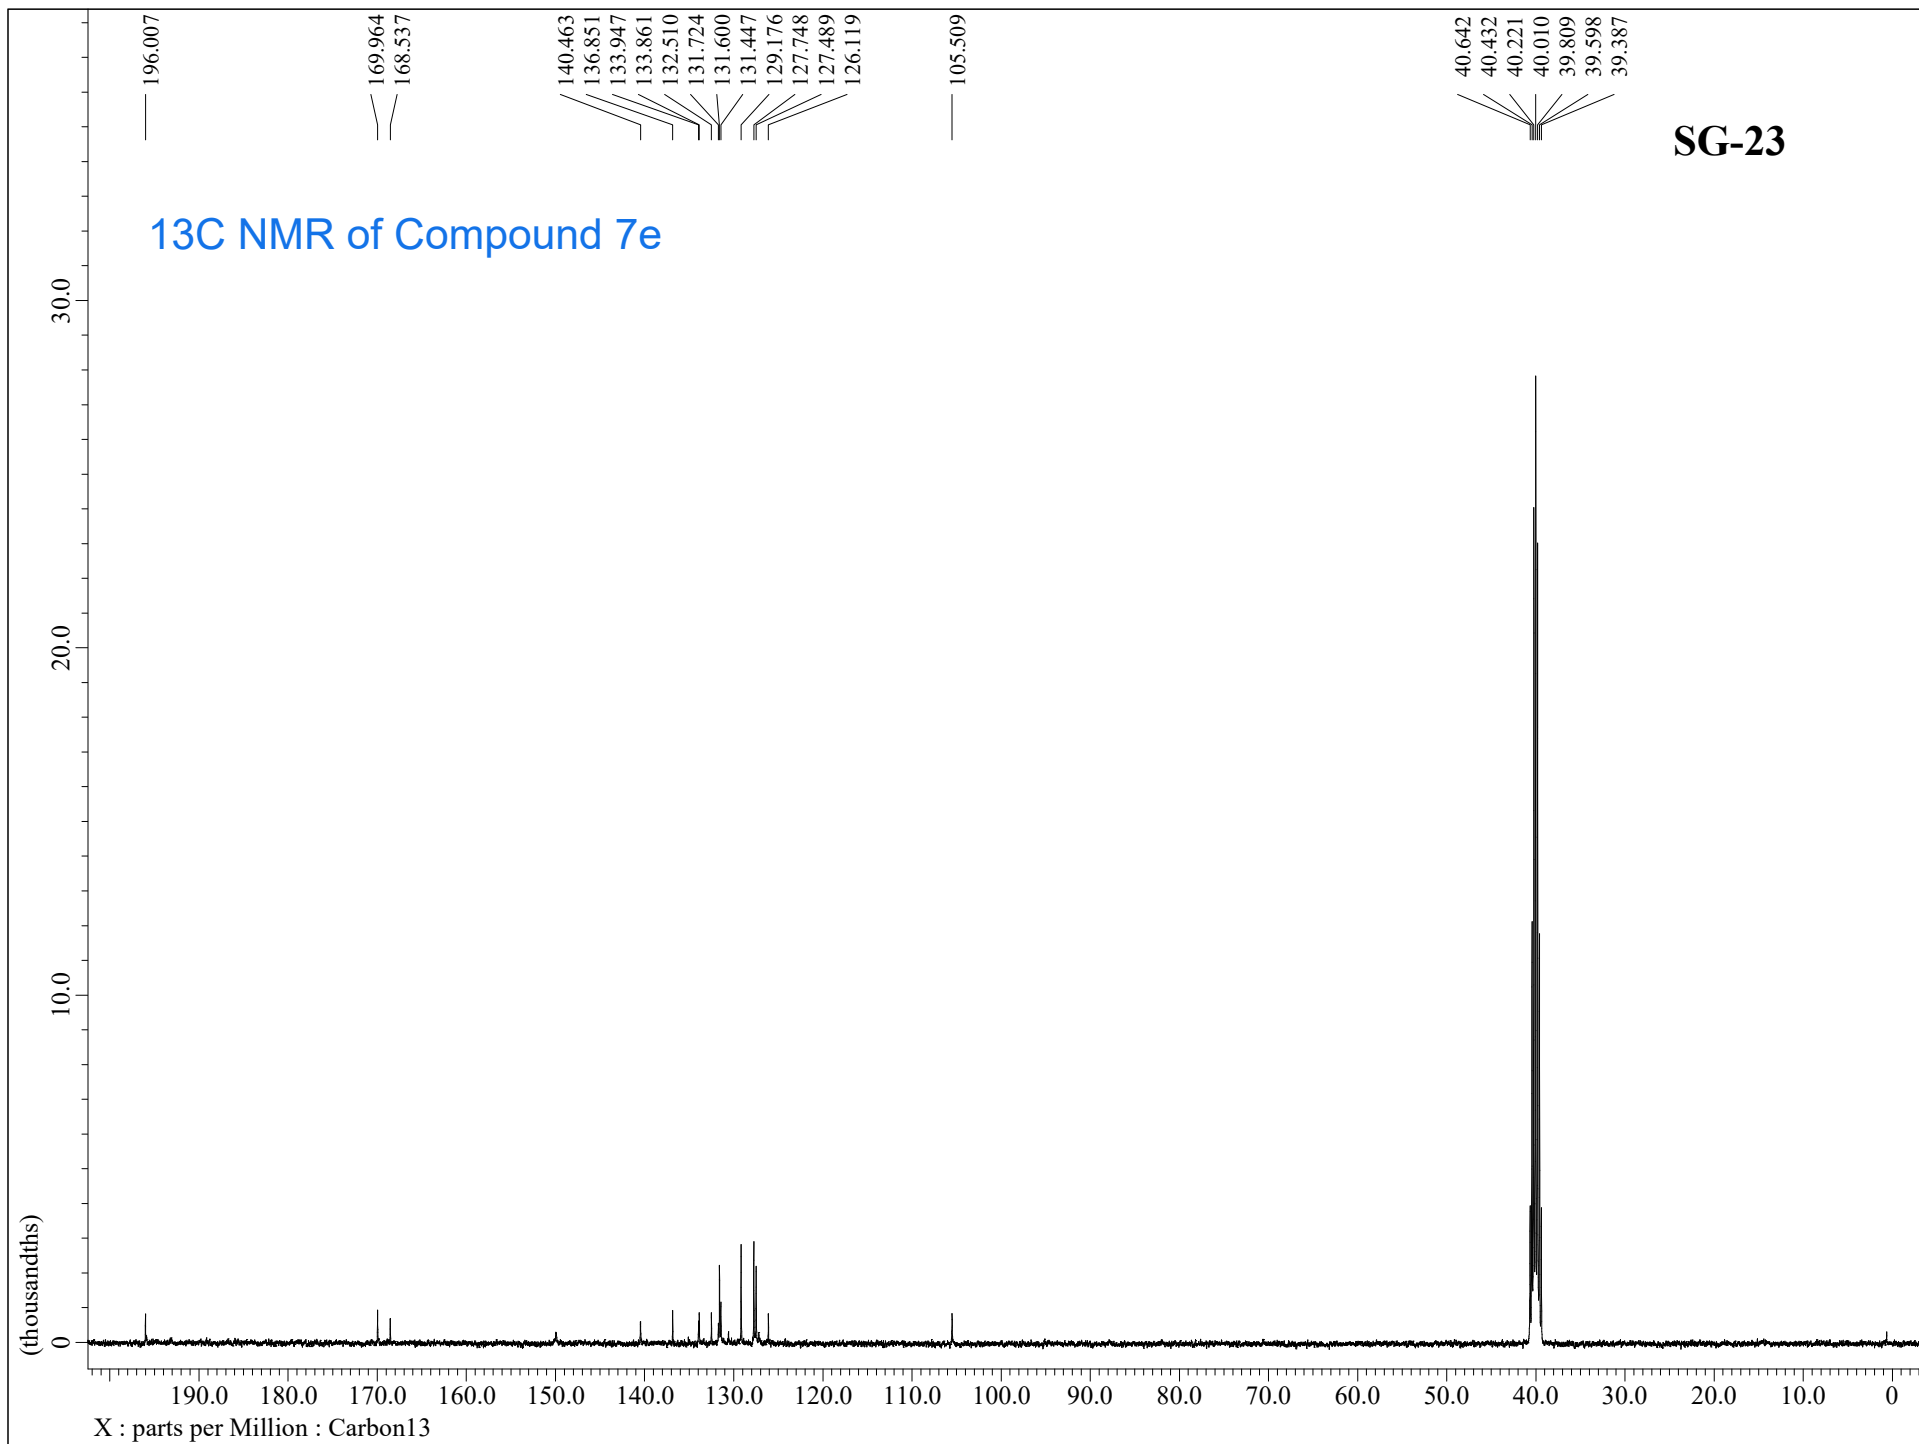

SG-23

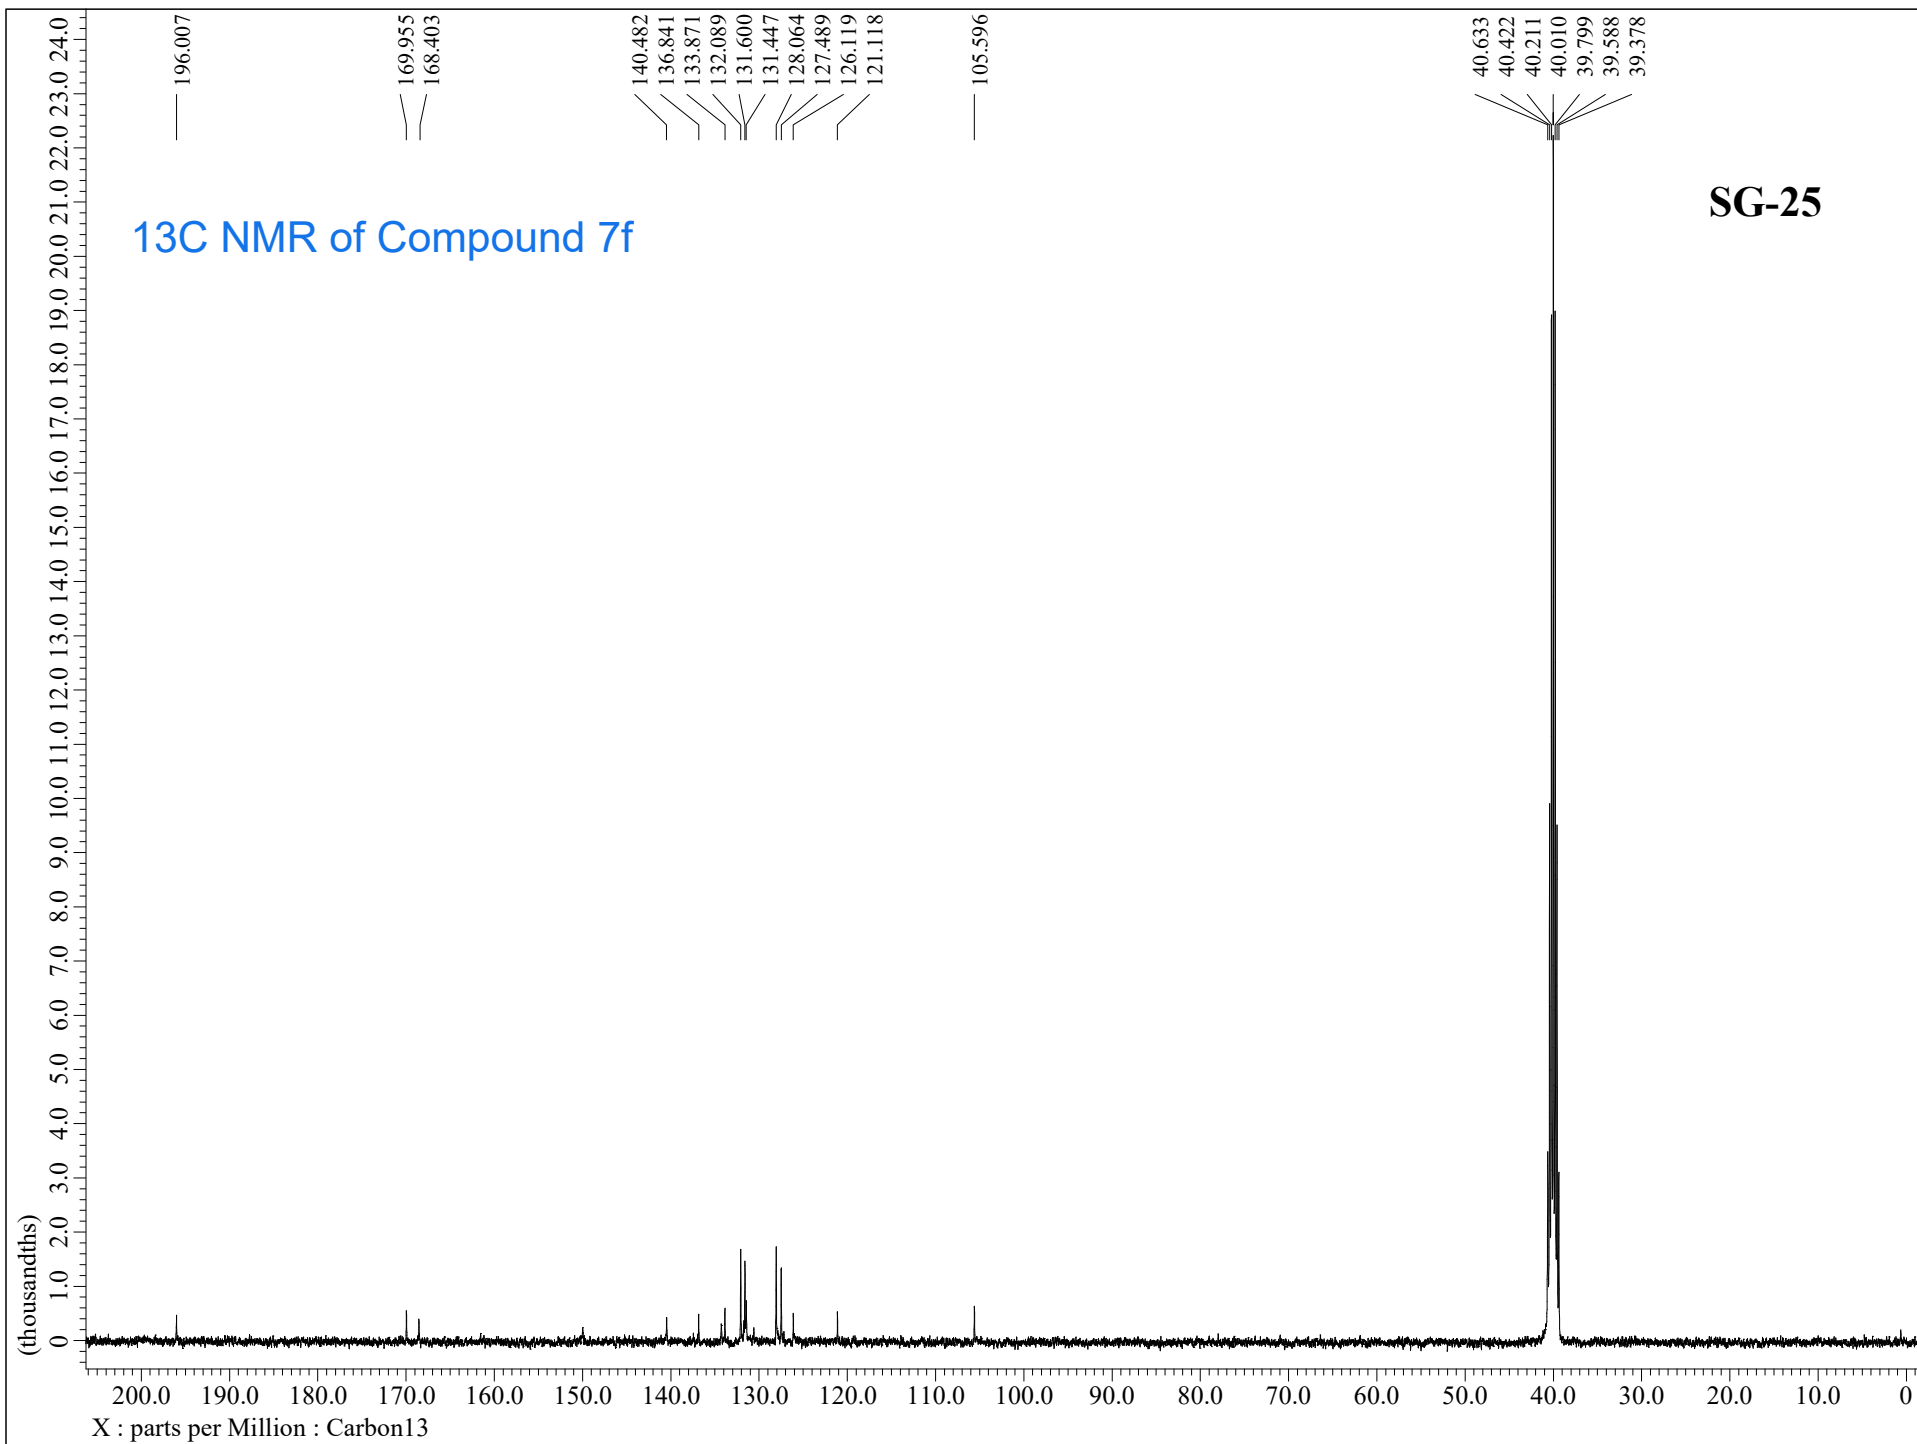

SG-25



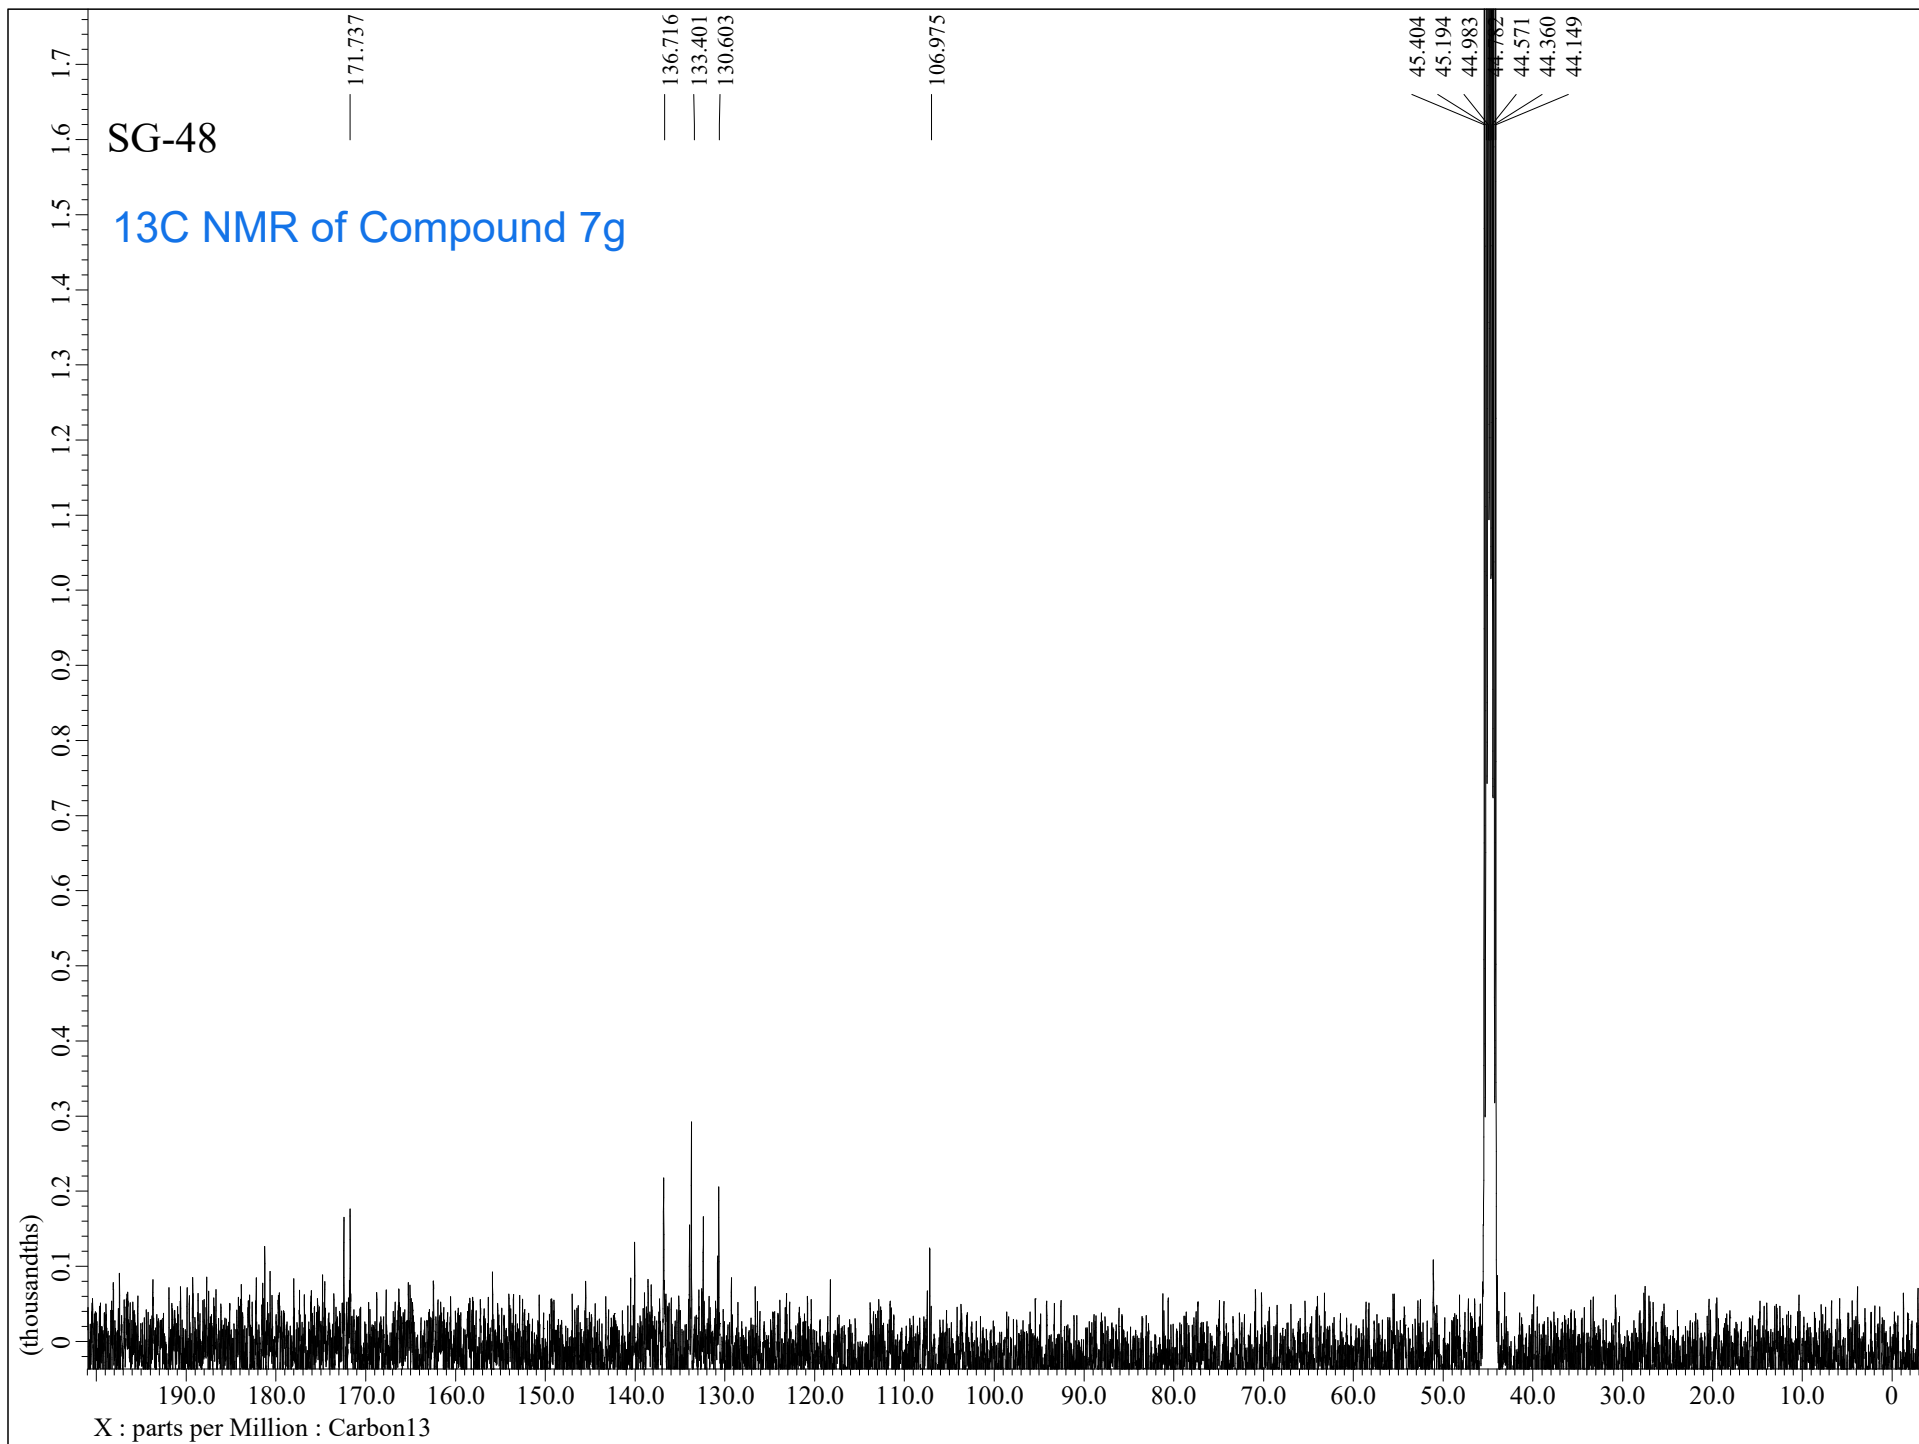

SG-50

<sup>13</sup>C NMR of Compound 7h

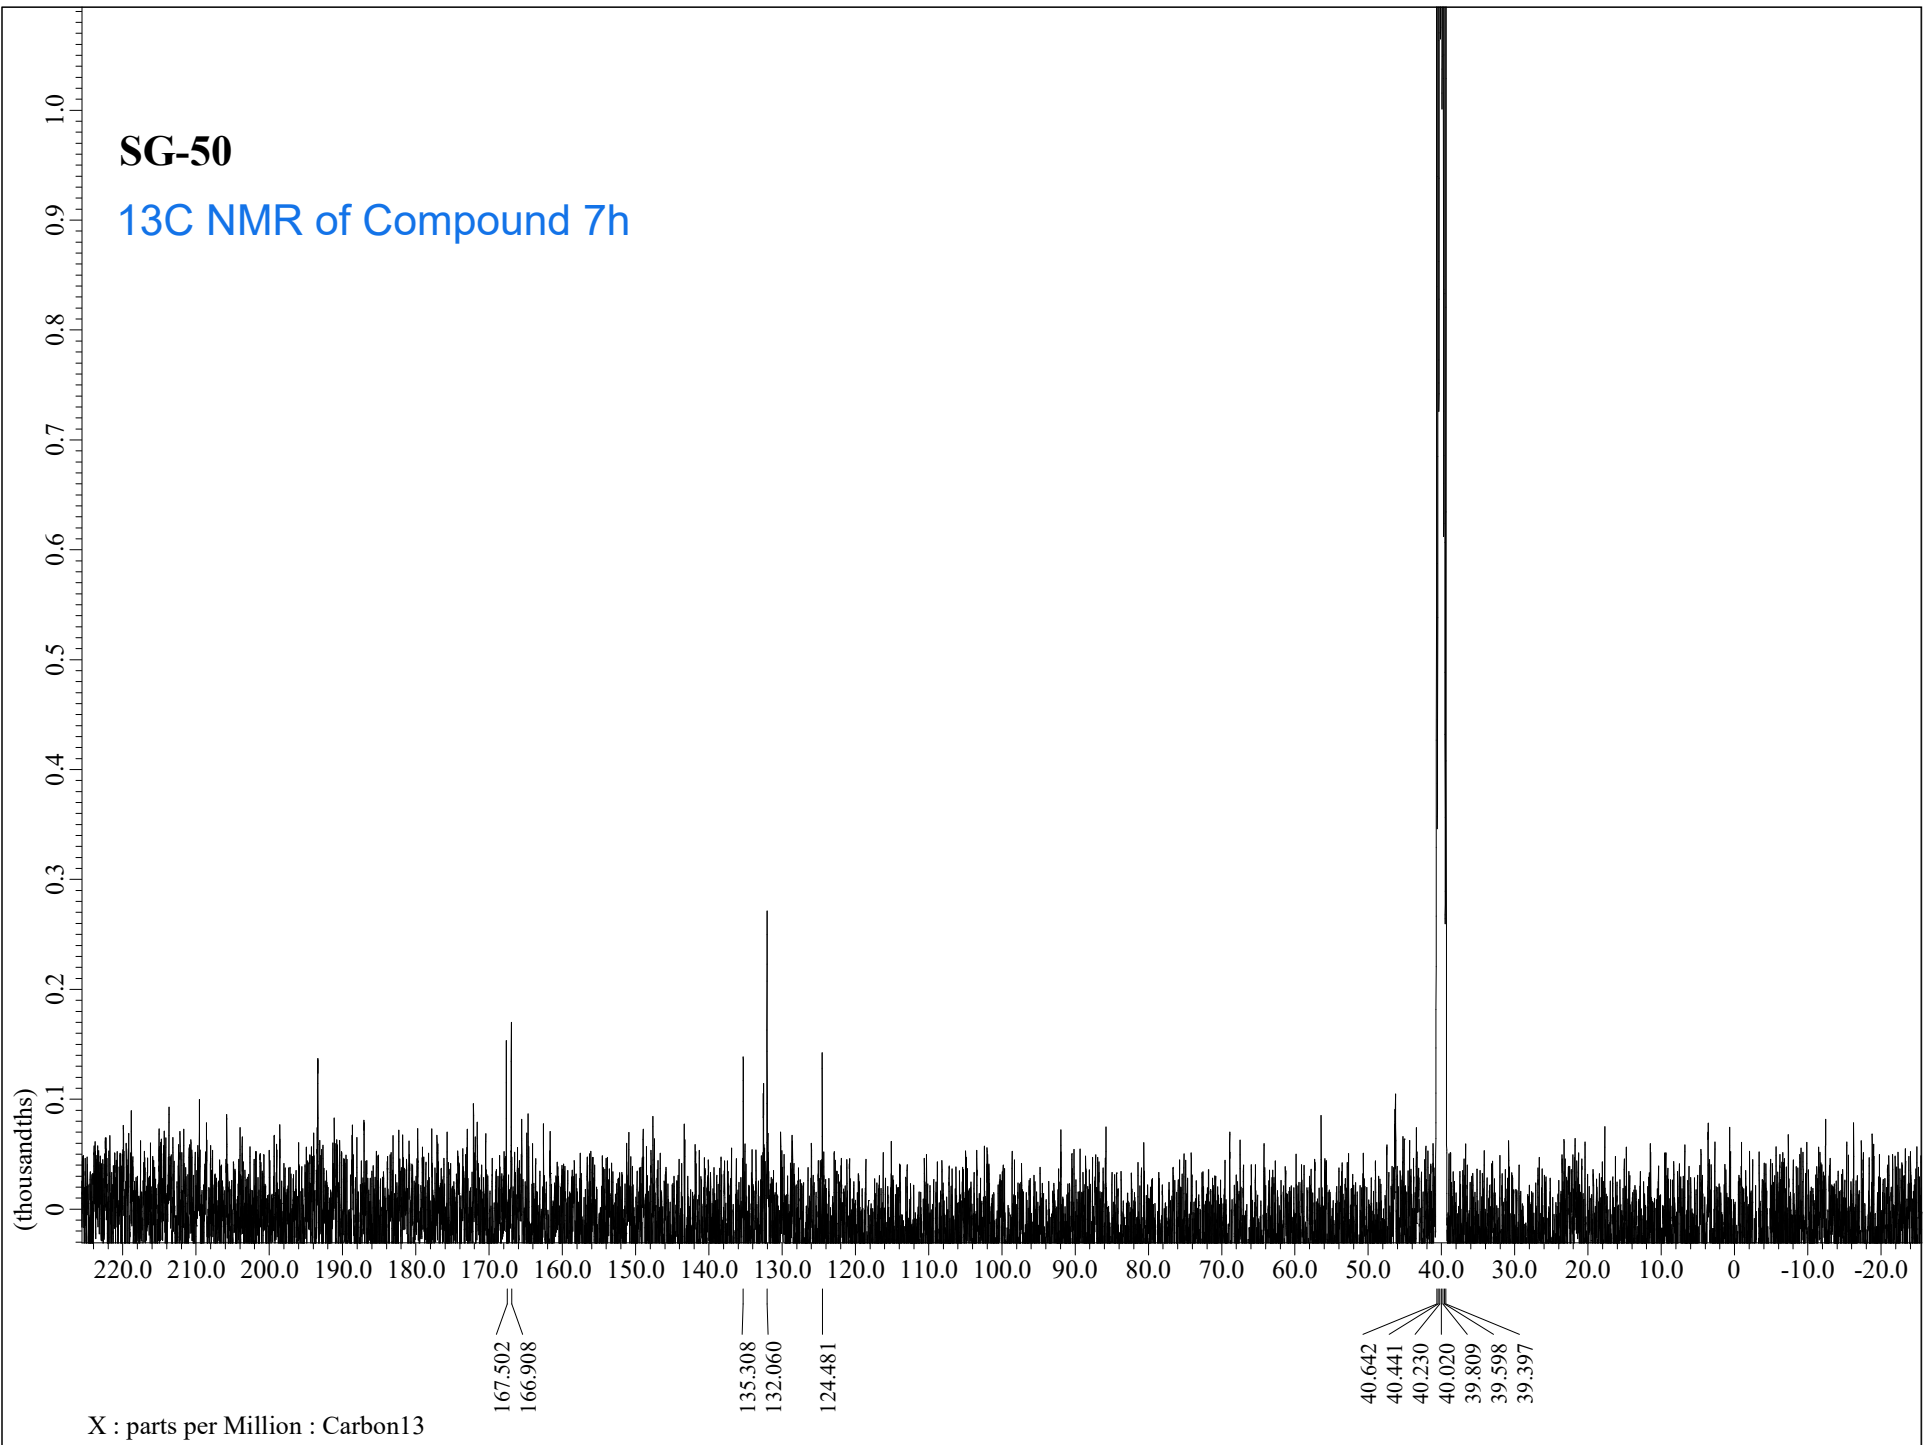

X : parts per Million : Carbon13

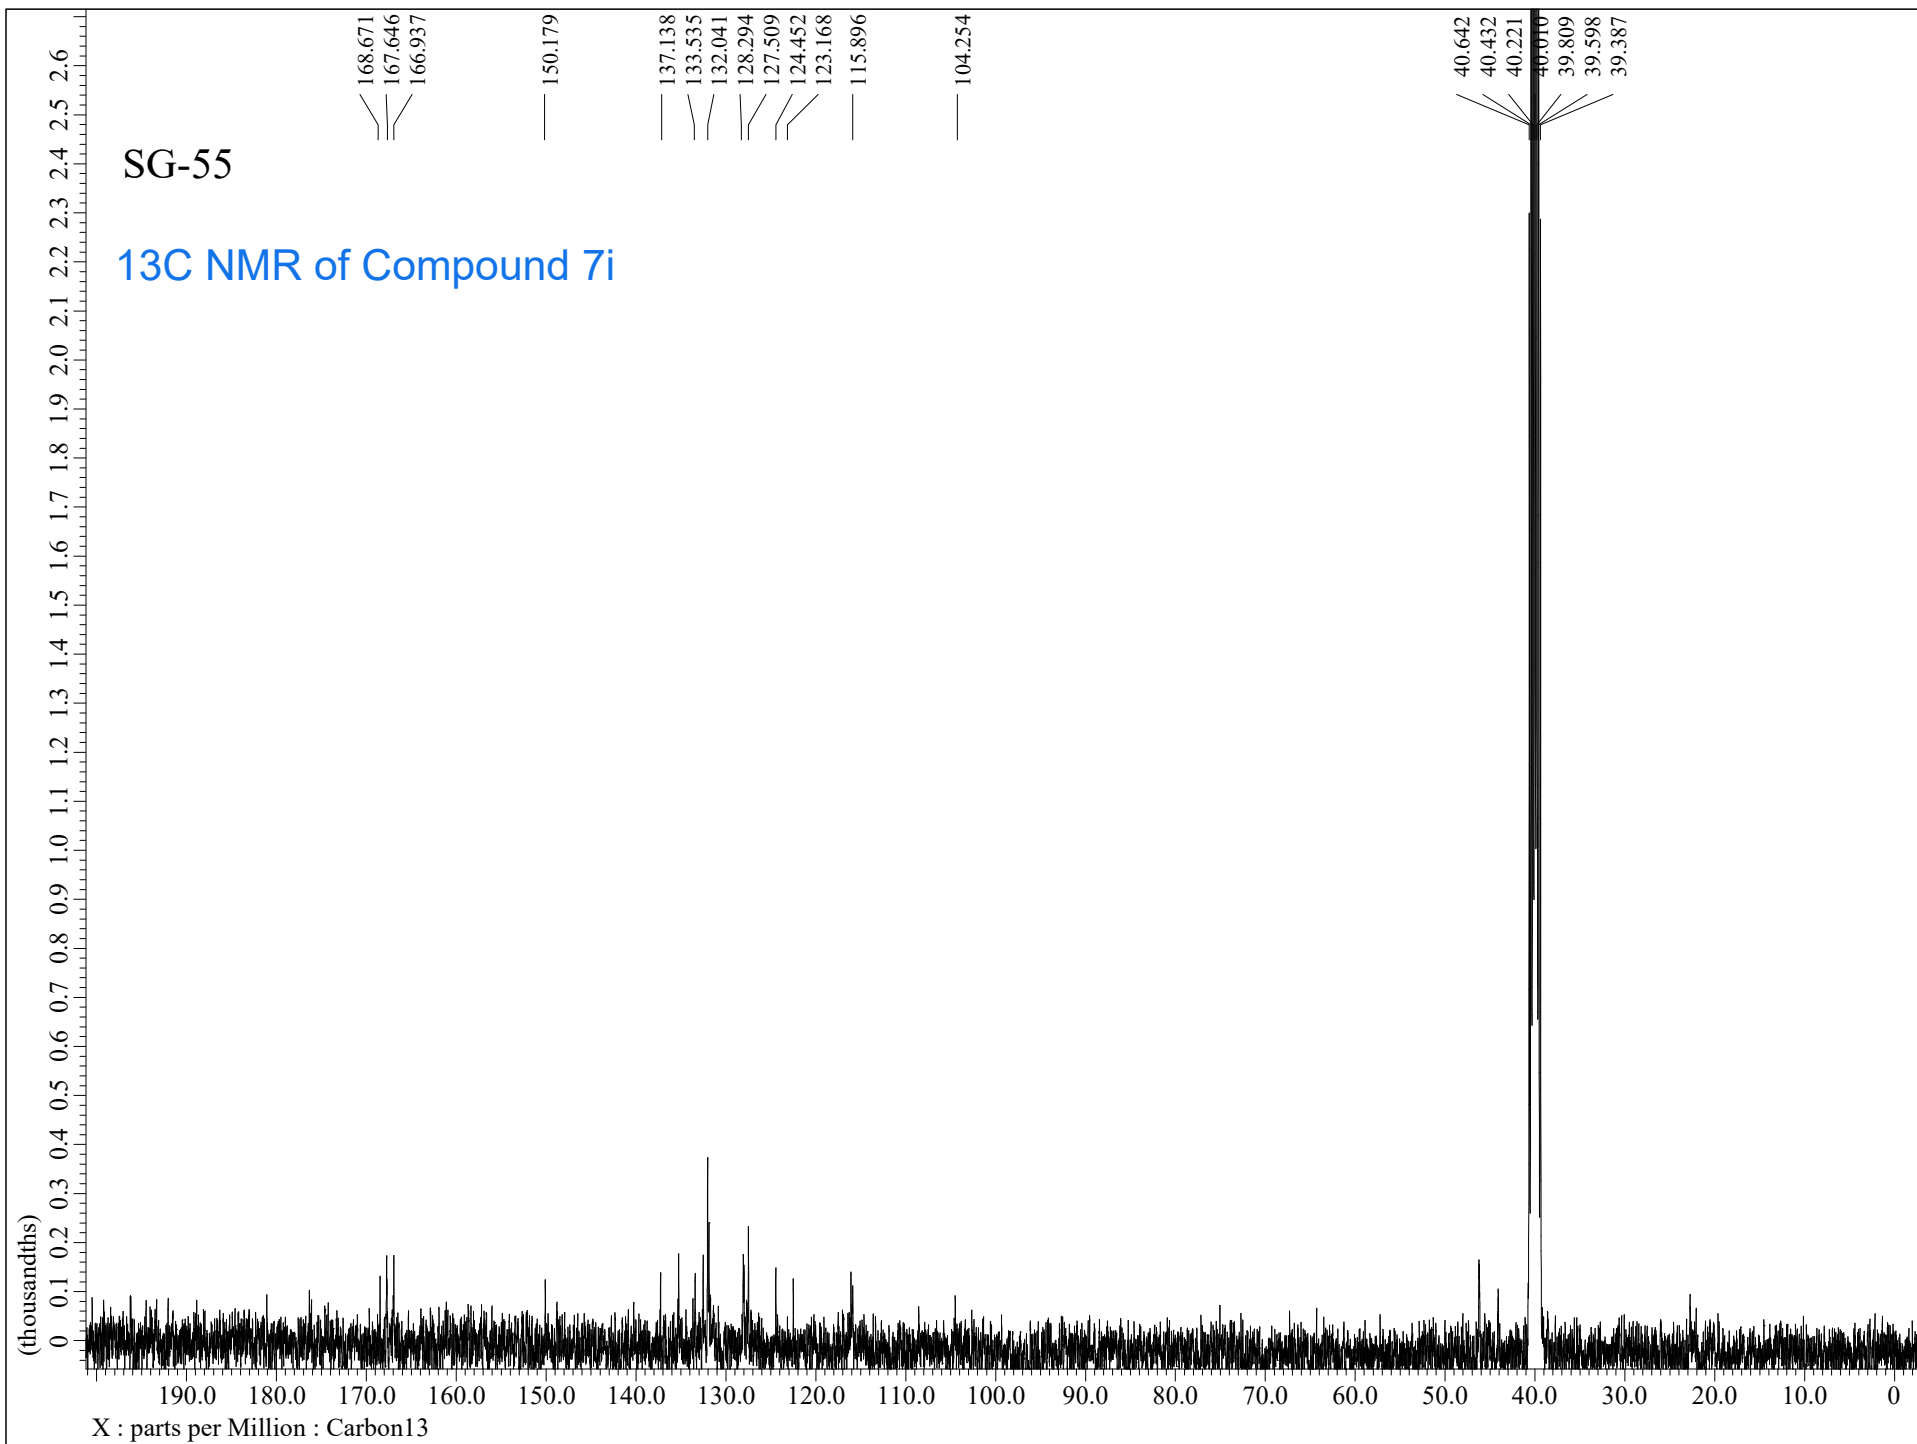

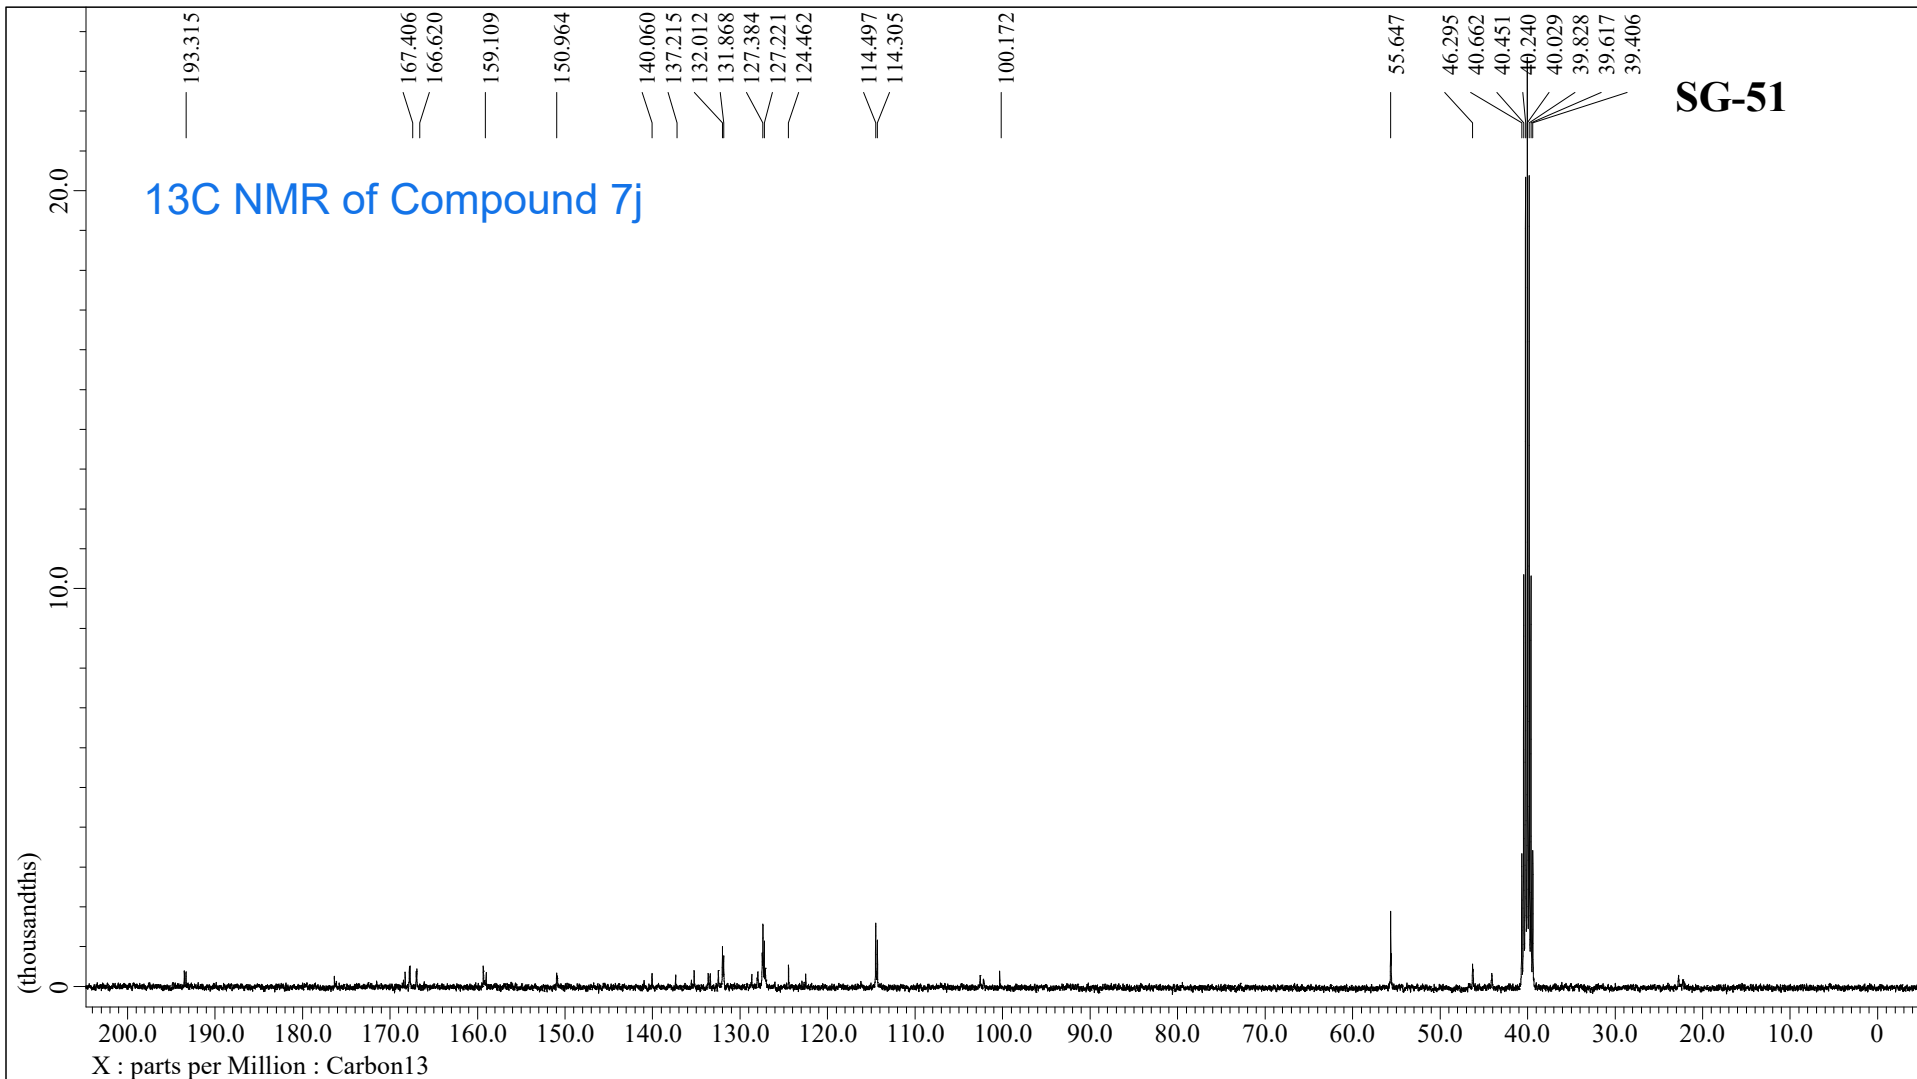

|               |                      |                 |                         |
|---------------|----------------------|-----------------|-------------------------|
| Filename      | = SR_SG 51_Carbon-1- | Field Strength  | = 9.39094035 [T] (400   |
| Author        | = default            | X_Acq_Duration  | = 1.03809024 [s]        |
| Experiment    | = carbon.jxp         | X_Domain        | = 13C                   |
| Sample_Id     | = SR/SG 51           | X_Freq          | = 100.53787572 [MHz]    |
| Solvent       | = DMSO-D6            | X_Offset        | = 100 [ppm]             |
| Creation_Time | = 8-MAY-2024 18:42:  | X_Points        | = 32768                 |
| Revision_Time | = 10-MAY-2024 19:22: | X_Prescans      | = 4                     |
| Current_Time  | = 10-MAY-2024 19:23: | X_Resolution    | = 0.96330739 [Hz]       |
|               |                      | X_Sweep         | = 31.56565657 [kHz]     |
| Comment       | = single pulse decou | X_Sweep_Clipped | = 25.25252525 [kHz]     |
| Data_Format   | = 1D_COMPLEX         | Irr_Domain      | = Proton                |
| Dim_Size      | = 26214              | Irr_Freq        | = 399.83219794 [MHz]    |
| Dim_Title     | = Carbon13           | Irr_Offset      | = 5 [ppm]               |
| Dim_Units     | = [ppm]              | Blanking        | = 5 [us]                |
| Dimensions    | = X                  | Clipped         | = FALSE                 |
| Spectrometer  | = DELTA2_NMR         | Decimation_Reg  | = r: 198 ( 197 ), g: 39 |
|               |                      | Scans           | = 512                   |

```

---- PROCESSING PARAMETERS ----
sexp( 2.0[Hz], 0.0[s] )
trapezoid( 0[%], 0[%], 80[%], 100[%] )
zerofill( 1 )
fft( 1, TRUE, TRUE )
machinephase
ppm
Derived from: SR_SG 51_Carbon-1-1.jdf

```

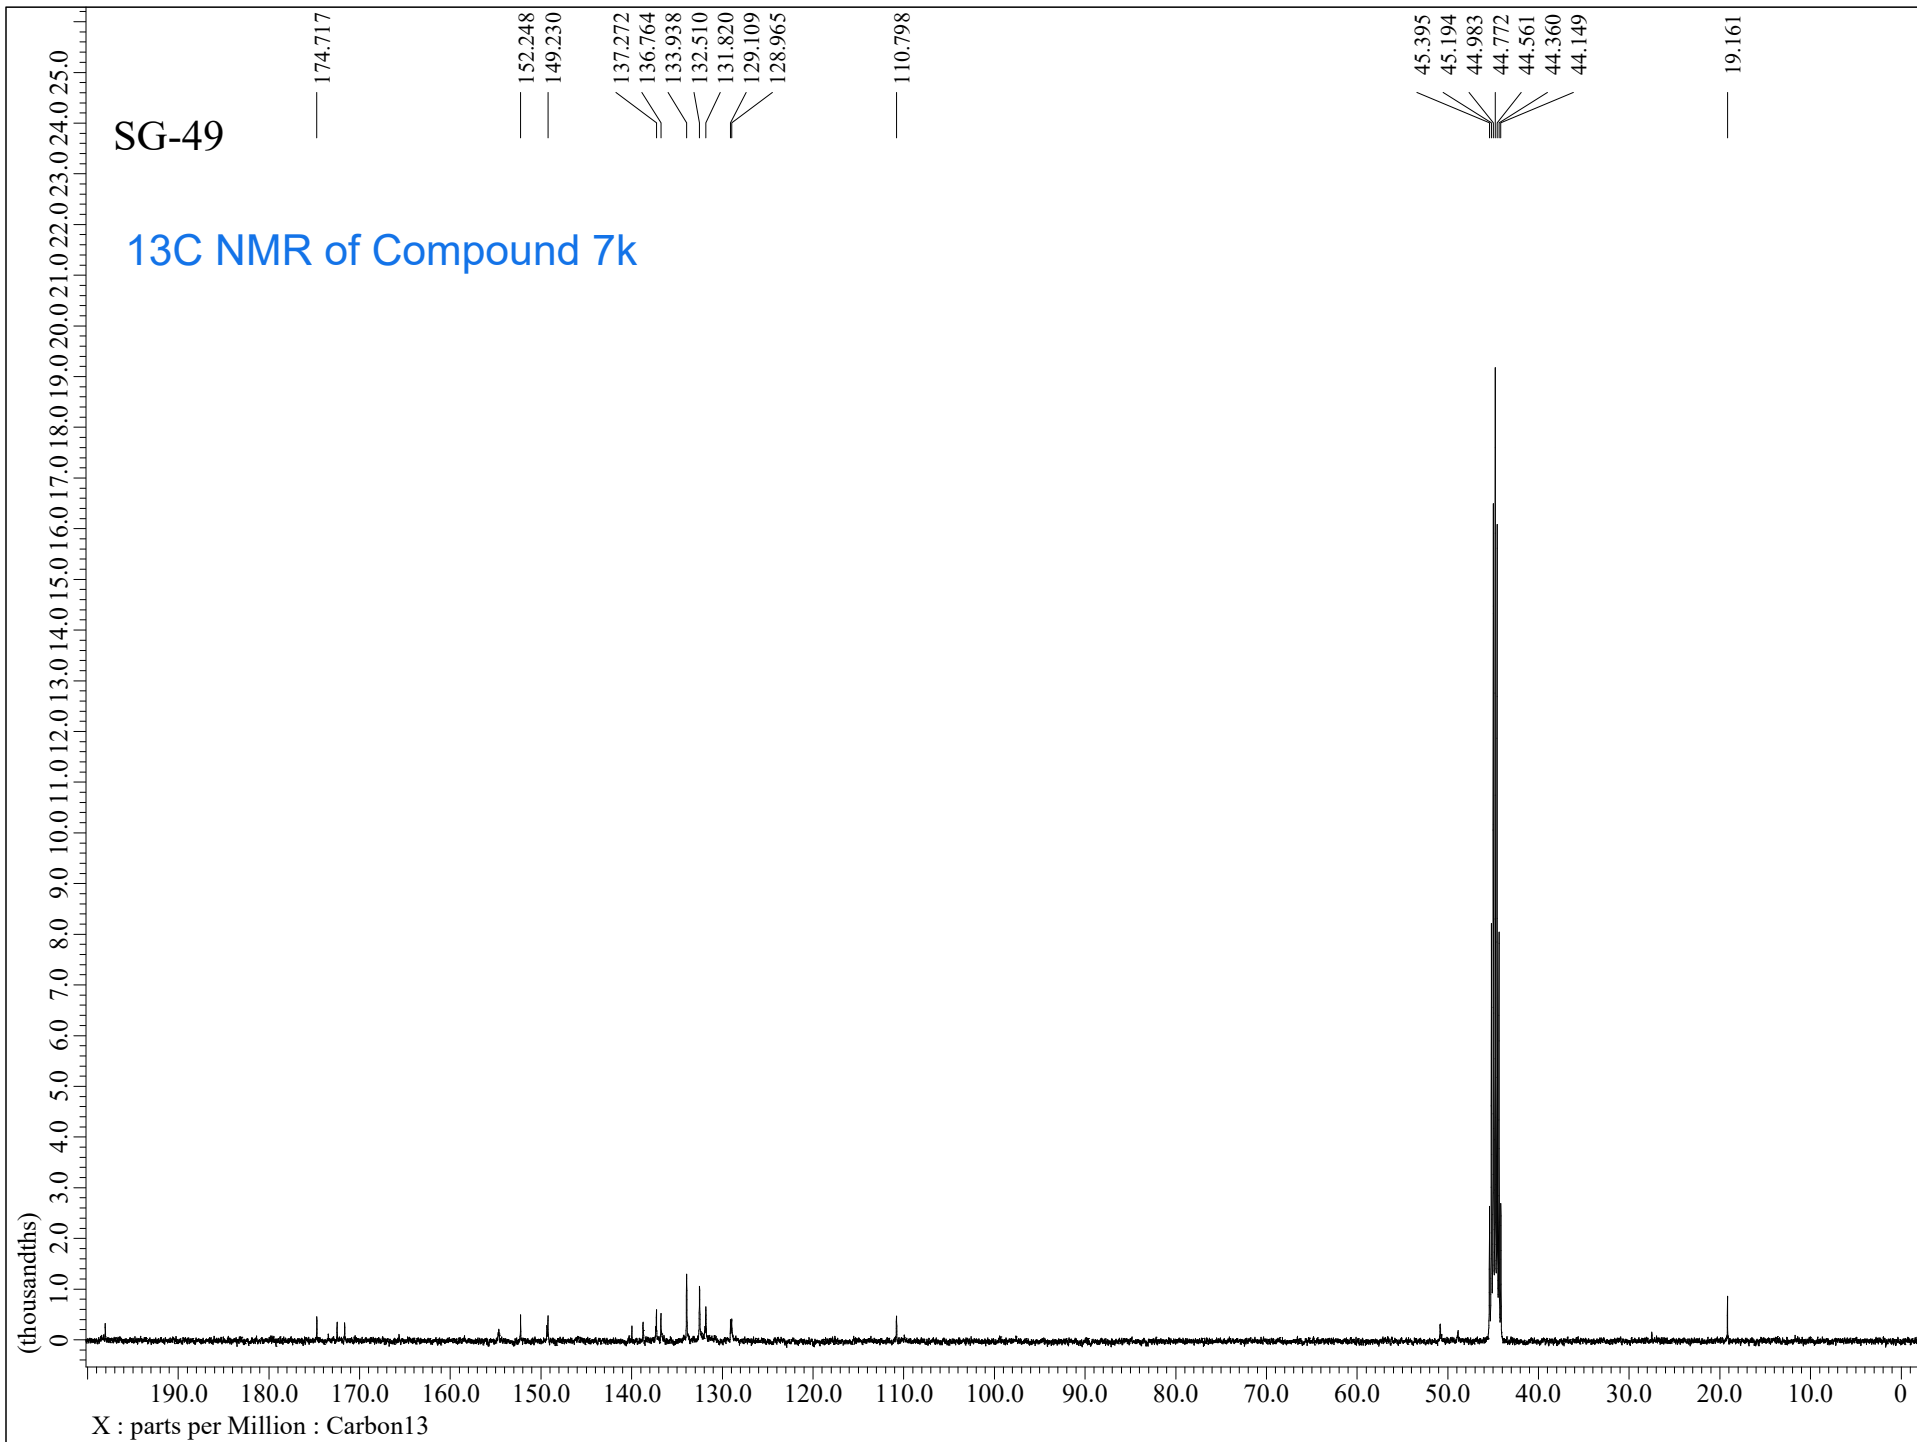

SG-52

<sup>13</sup>C NMR of Compound 7I

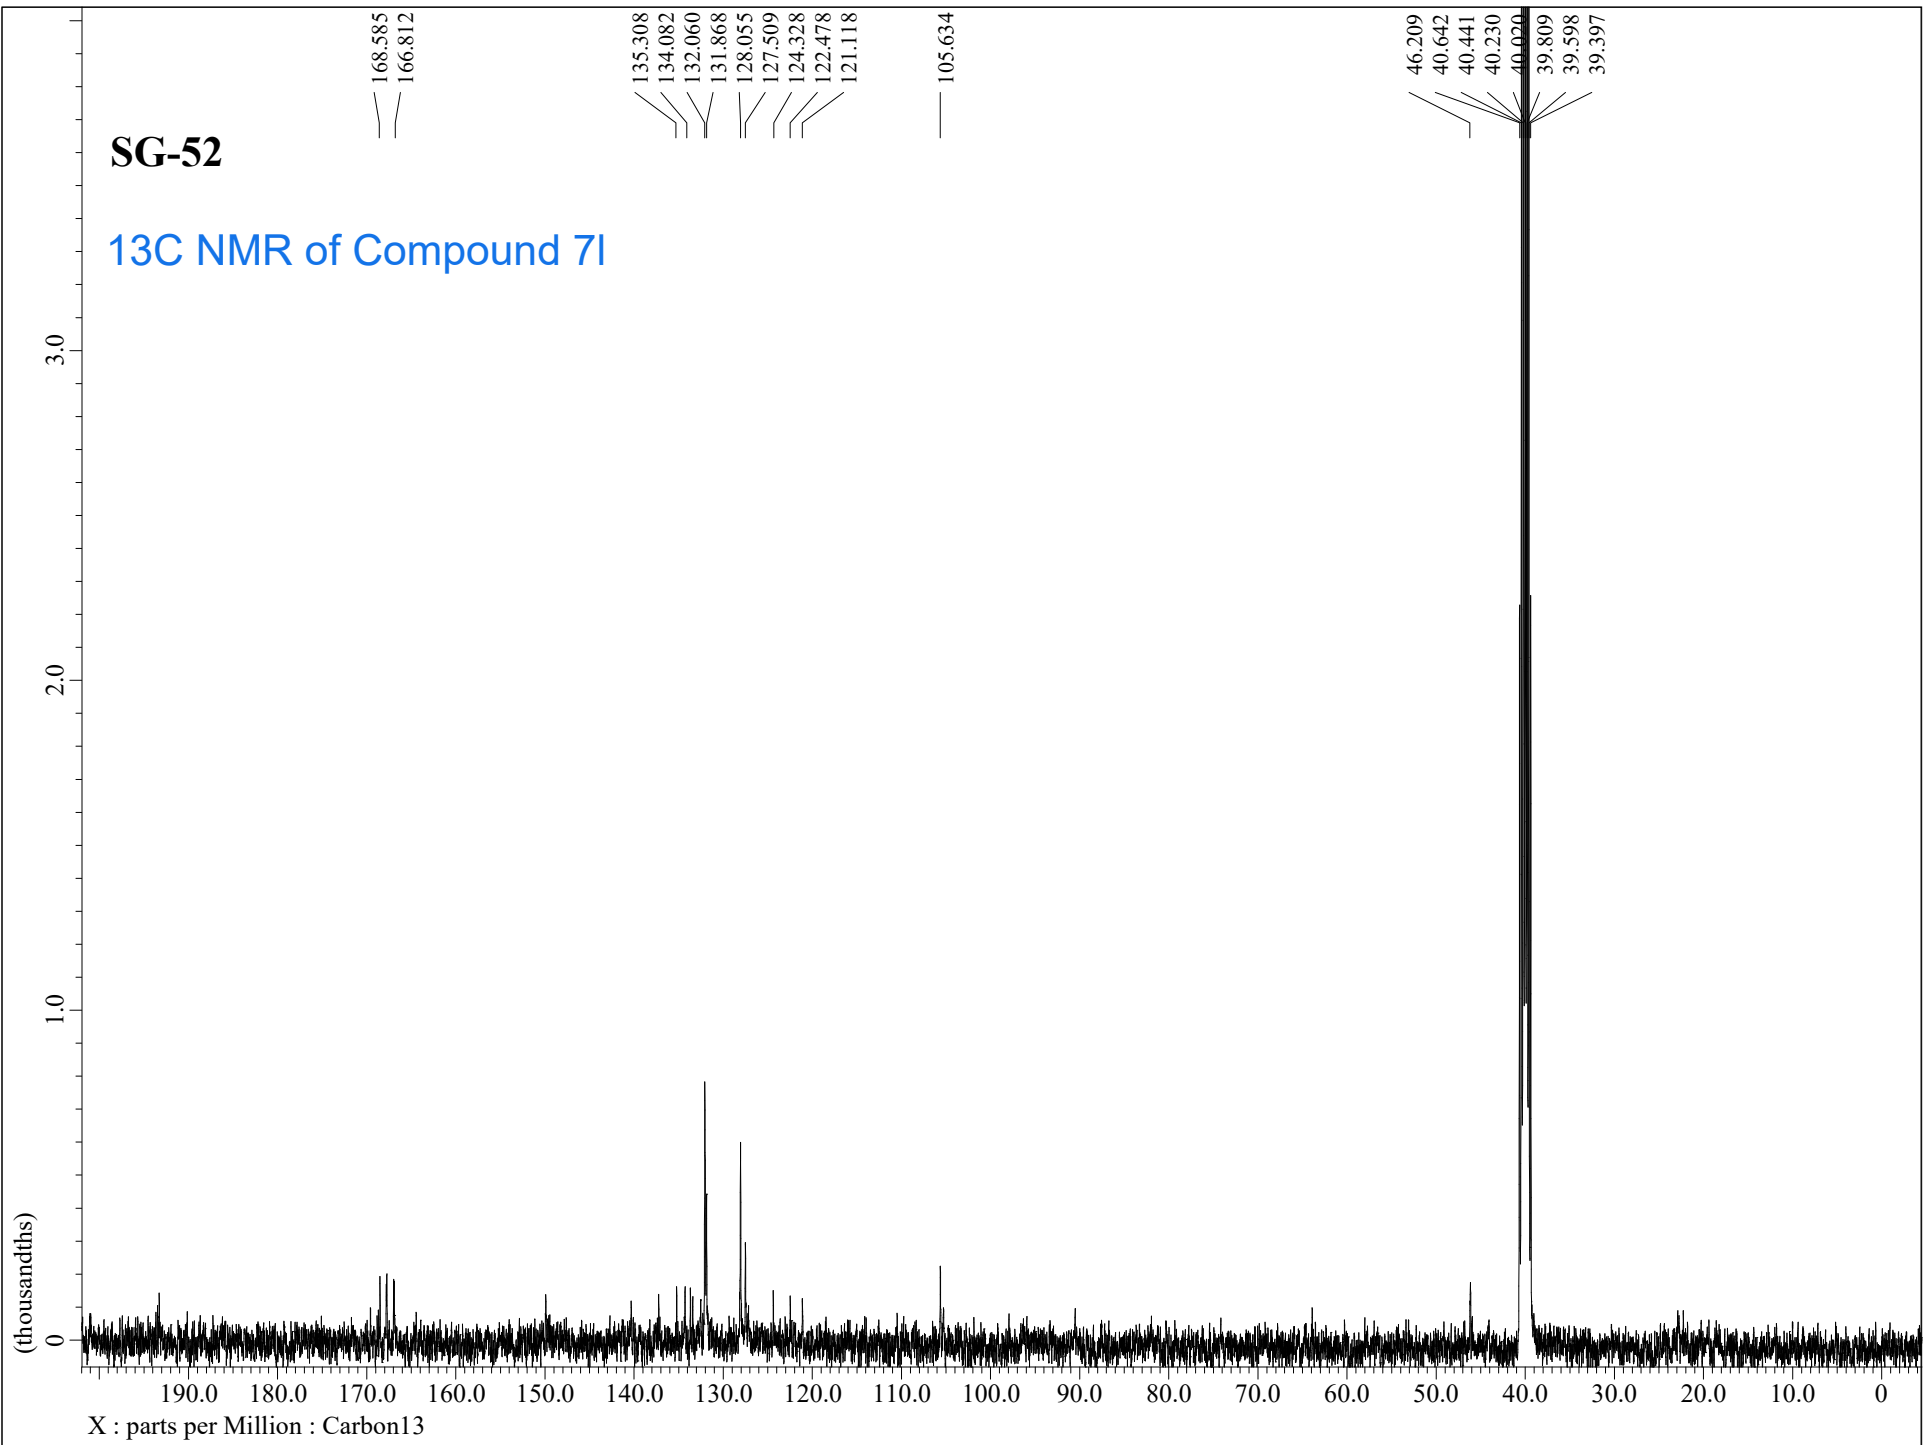

# HRMS of 7a (ESI) m/z calcd for C<sub>20</sub>H<sub>14</sub>N<sub>4</sub>OS<sub>3</sub> [M+H]<sup>+</sup>, 422.54; found, 423.03.

## Savitribai Phule Pune University - Central Instrumentation Facility

### Analysis Info

Acquisition Date 8/16/2024 7:11:32 PM  
 Analysis Name D:\Data\2024\AUG\SPPU COLLEGE\S. P. COLLEGE\PROF. PRAVIN MHASKE\SG31\_RA8\_01\_7865.d  
 Method dlc\_ms20-1200mz\_10min\_0.120ml flow\_90b\_july 2024.m Analyst : Nitin S. Kadam CIF  
 Sample Name SG31 Instrument impact HD 1819696.00184

### Acquisition Parameter

|             |          |                      |          |                  |           |
|-------------|----------|----------------------|----------|------------------|-----------|
| Source Type | ESI      | Ion Polarity         | Positive | Set Nebulizer    | 0.9 Bar   |
| Focus       | Active   | Set Capillary        | 4500 V   | Set Dry Heater   | 200 °C    |
| Scan Begin  | 20 m/z   | Set End Plate Offset | -500 V   | Set Dry Gas      | 7.0 l/min |
| Scan End    | 1200 m/z | Set Charging Voltage | 2000 V   | Set Divert Valve | Source    |
|             |          | Set Corona           | 0 nA     | Set APCI Heater  | 0 °C      |

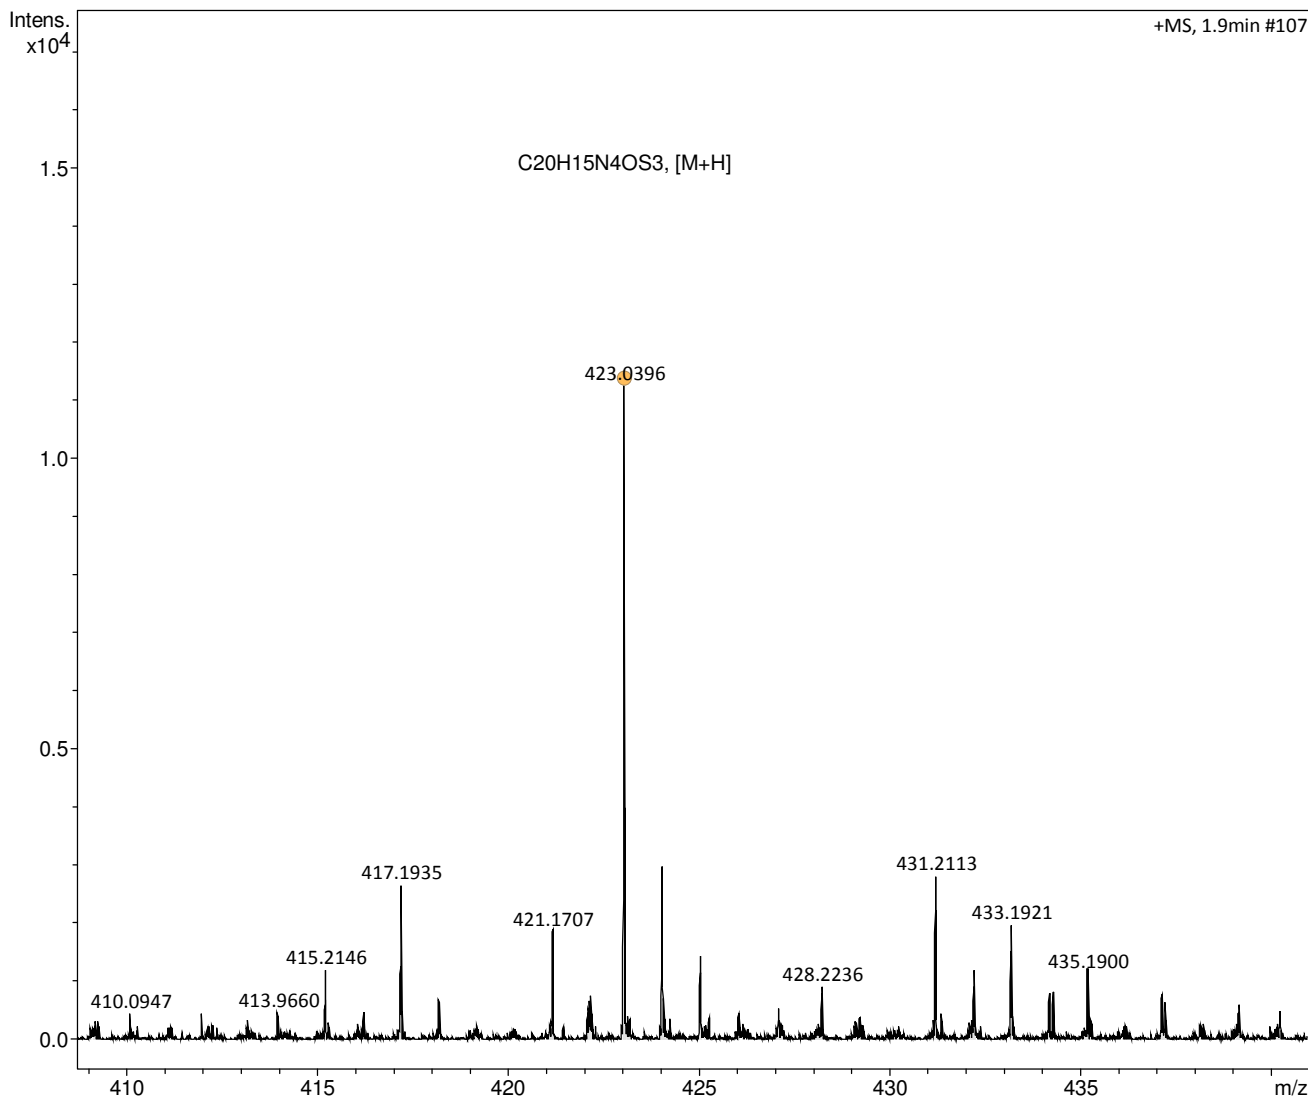

| Meas. m/z  | # | Ion Formula                                                    | Score  | m/z        | err [mDa] | err [ppm] | mSigma | rdb  | e <sup>-</sup> | Conf | N-Rule | Adduct |
|------------|---|----------------------------------------------------------------|--------|------------|-----------|-----------|--------|------|----------------|------|--------|--------|
| 423.039565 | 1 | C <sub>20</sub> H <sub>15</sub> N <sub>4</sub> OS <sub>3</sub> | 100.00 | 423.040251 | 0.7       | 1.6       | 18.6   | 15.5 | even           |      | ok     | M+H    |

Savitribai Phule Pune University - Central Instrumentation Facility

Analysis Info

Analysis Name D:\Data\2024\AUG\SPPU COLLEGE\S. P. COLLEGE\PROF. PRAVIN MHASKE\SG17\_RA1\_01\_7858.d  
 Method dlc\_ms20-1200mz\_10min\_0.120ml flow\_90b\_july 2024.m Analyst : Nitin S. Kadam CIF  
 Sample Name SG17 Instrument impact HD 1819696.00184

Acquisition Date 8/16/2024 5:56:50 PM

Acquisition Parameter

|             |          |                      |          |                  |           |
|-------------|----------|----------------------|----------|------------------|-----------|
| Source Type | ESI      | Ion Polarity         | Positive | Set Nebulizer    | 0.9 Bar   |
| Focus       | Active   | Set Capillary        | 4500 V   | Set Dry Heater   | 200 °C    |
| Scan Begin  | 20 m/z   | Set End Plate Offset | -500 V   | Set Dry Gas      | 7.0 l/min |
| Scan End    | 1200 m/z | Set Charging Voltage | 2000 V   | Set Divert Valve | Source    |
|             |          | Set Corona           | 0 nA     | Set APCI Heater  | 0 °C      |

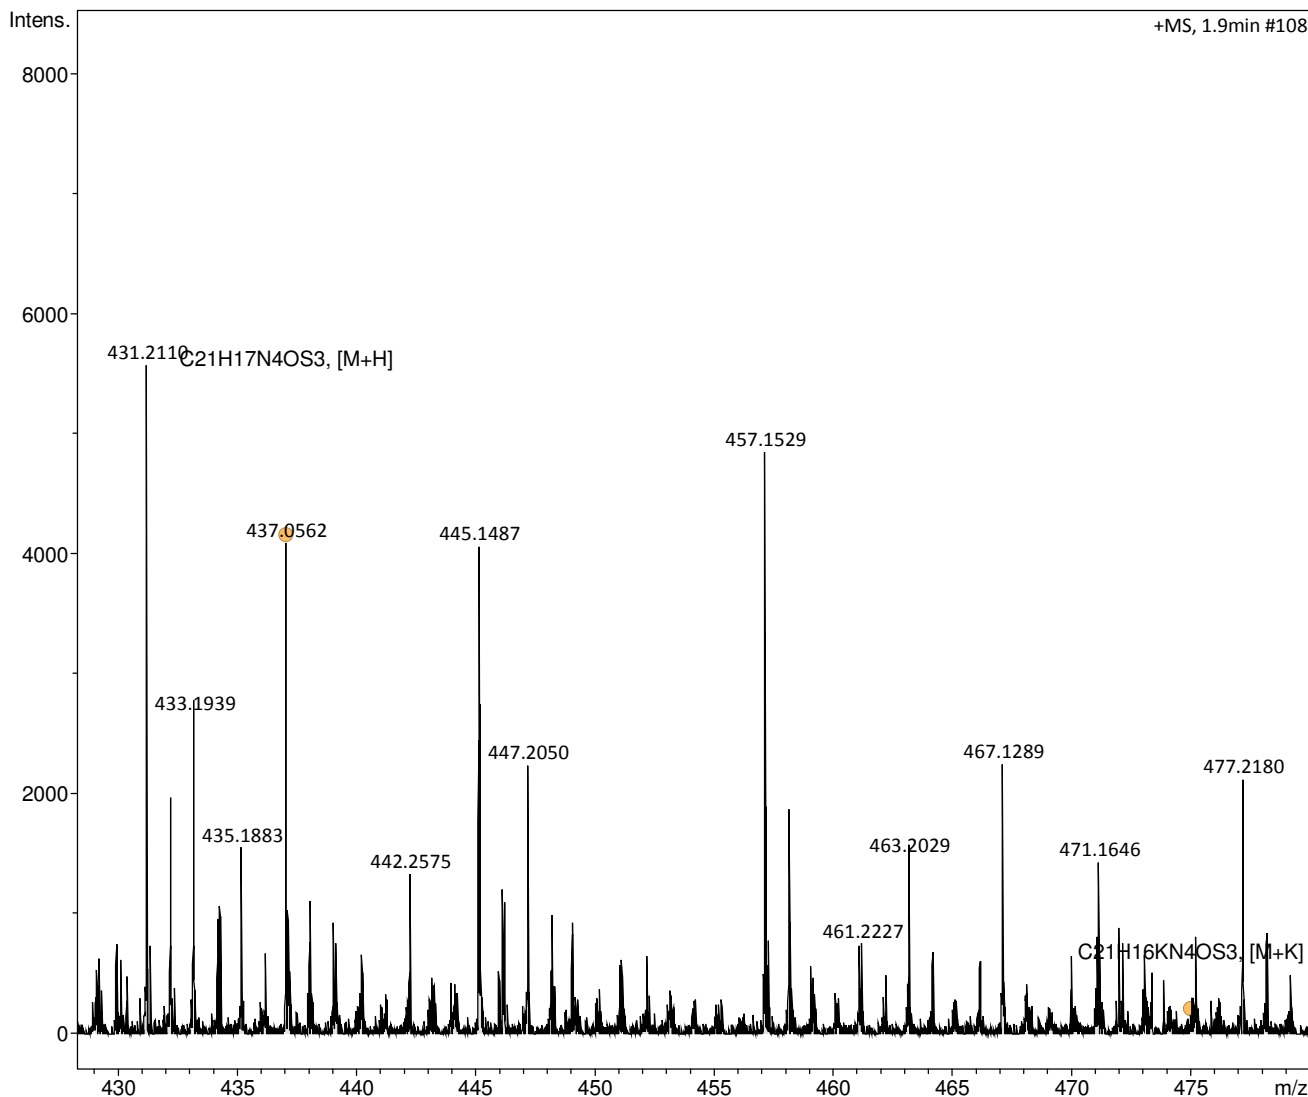

| Meas. m/z  | # | Ion Formula                                                      | Score  | m/z        | err [mDa] | err [ppm] | mSigma | rdb  | e <sup>-</sup> | Conf | N-Rule | Adduct |
|------------|---|------------------------------------------------------------------|--------|------------|-----------|-----------|--------|------|----------------|------|--------|--------|
| 437.056248 | 1 | C <sub>21</sub> H <sub>17</sub> N <sub>4</sub> O <sub>3</sub> S  | 100.00 | 437.055901 | -0.3      | -0.8      | 26.2   | 15.5 | even           |      | ok     | M+H    |
| 475.013241 | 1 | C <sub>21</sub> H <sub>16</sub> KN <sub>4</sub> O <sub>3</sub> S | 100.00 | 475.011782 | -1.5      | -3.1      | 364.5  | 15.5 | even           |      | ok     | M+K    |



Savitribai Phule Pune University - Central Instrumentation Facility

Analysis Info

Analysis Name D:\Data\2024\AUG\SPPU COLLEGE\S. P. COLLEGE\PROF. PRAVIN MHASKE\SG-60\_RC2\_01\_7972.d  
 Method dlc\_ms20-1200mz\_10min\_0.120ml flow\_90b\_july 2024.m Analyst : Nitin S. Kadam CIF  
 Sample Name SG-60 Instrument impact HD 1819696.00184

Acquisition Date 8/31/2024 6:55:50 PM

Acquisition Parameter

|             |          |                      |          |                  |           |
|-------------|----------|----------------------|----------|------------------|-----------|
| Source Type | ESI      | Ion Polarity         | Positive | Set Nebulizer    | 0.9 Bar   |
| Focus       | Active   | Set Capillary        | 4500 V   | Set Dry Heater   | 200 °C    |
| Scan Begin  | 20 m/z   | Set End Plate Offset | -500 V   | Set Dry Gas      | 7.0 l/min |
| Scan End    | 1200 m/z | Set Charging Voltage | 2000 V   | Set Divert Valve | Source    |
|             |          | Set Corona           | 0 nA     | Set APCI Heater  | 0 °C      |

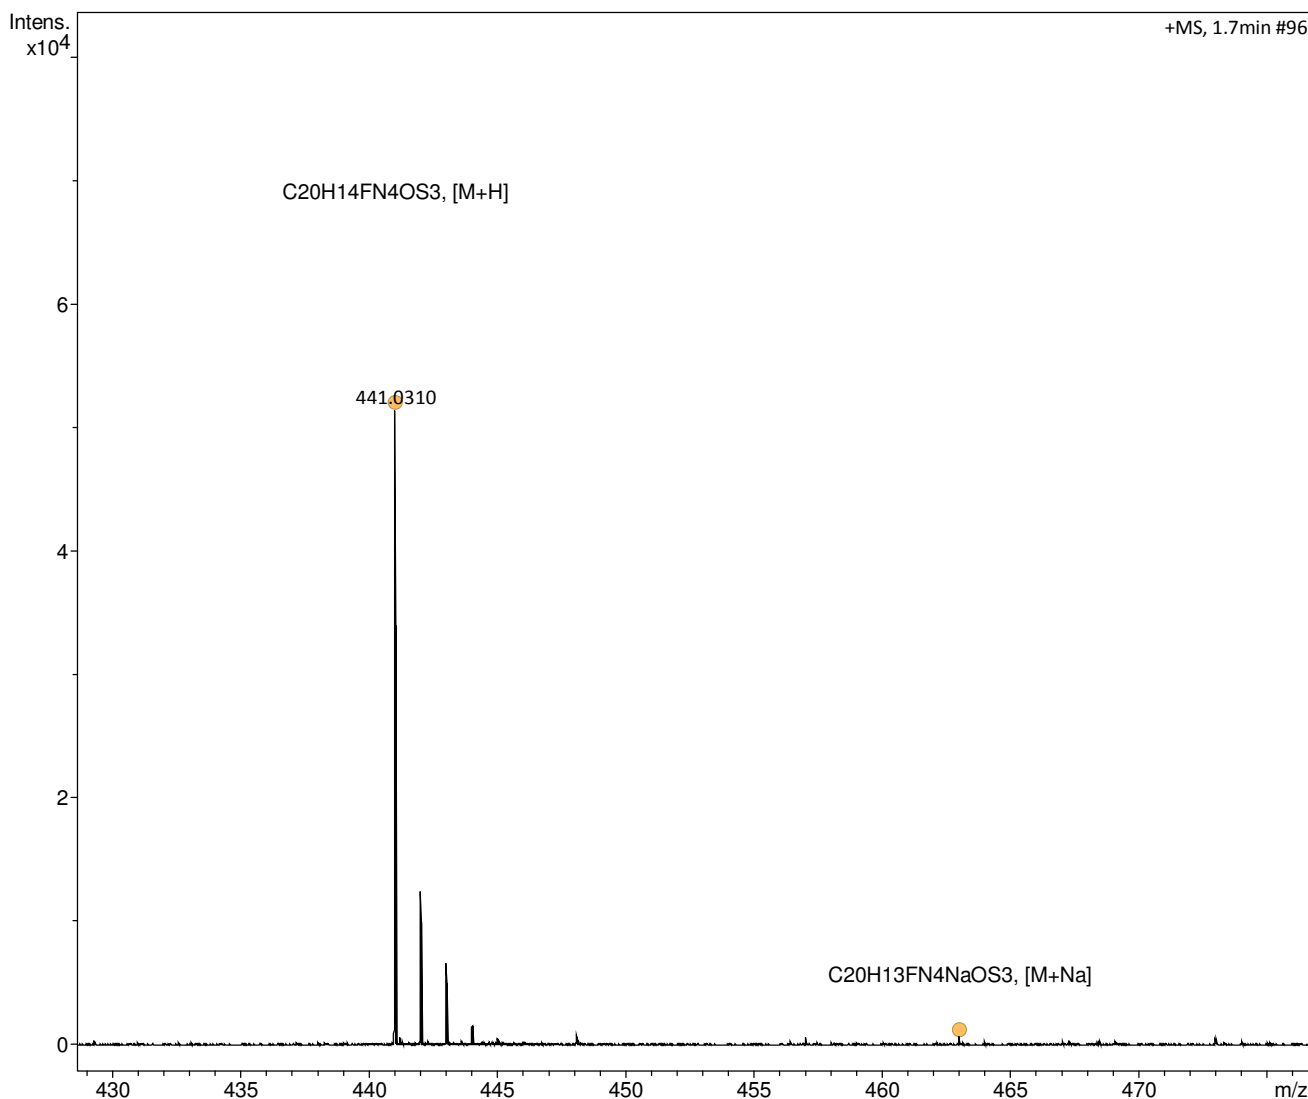

| Meas. m/z  | # | Ion Formula                                                       | Score  | m/z        | err [mDa] | err [ppm] | mSigma | rdb  | e <sup>-</sup> | Conf | N-Rule | Adduct |
|------------|---|-------------------------------------------------------------------|--------|------------|-----------|-----------|--------|------|----------------|------|--------|--------|
| 441.031020 | 1 | C <sub>20</sub> H <sub>14</sub> FN <sub>4</sub> OS <sub>3</sub>   | 100.00 | 441.030829 | -0.2      | -0.4      | 19.4   | 15.5 | even           |      | ok     | M+H    |
| 463.012543 | 1 | C <sub>20</sub> H <sub>13</sub> FN <sub>4</sub> NaOS <sub>3</sub> | 100.00 | 463.012773 | 0.2       | 0.5       | 81.6   | 15.5 | even           |      | ok     | M+Na   |

HRMS of 7d (ESI) m/z calcd for C<sub>21</sub>H<sub>16</sub>N<sub>4</sub>O<sub>2</sub>S<sub>3</sub> [M+H]<sup>+</sup>, 452.57; found, 453.05.

Savitribai Phule Pune University - Central Instrumentation Facility

Analysis Info

Analysis Name D:\Data\2024\AUG\SPPU COLLEGE\S. P. COLLEGE\PROF. PRAVIN MHASKE\SG19\_RA4\_01\_7861.d  
 Method dlc\_ms20-1200mz\_10min\_0.120ml flow\_90b\_july 2024.m Analyst : Nitin S. Kadam CIF  
 Sample Name SG19 Instrument impact HD 1819696.00184

Acquisition Date 8/16/2024 6:28:52 PM

Acquisition Parameter

|             |          |                      |          |                  |           |
|-------------|----------|----------------------|----------|------------------|-----------|
| Source Type | ESI      | Ion Polarity         | Positive | Set Nebulizer    | 0.9 Bar   |
| Focus       | Active   | Set Capillary        | 4500 V   | Set Dry Heater   | 200 °C    |
| Scan Begin  | 20 m/z   | Set End Plate Offset | -500 V   | Set Dry Gas      | 7.0 l/min |
| Scan End    | 1200 m/z | Set Charging Voltage | 2000 V   | Set Divert Valve | Source    |
|             |          | Set Corona           | 0 nA     | Set APCI Heater  | 0 °C      |

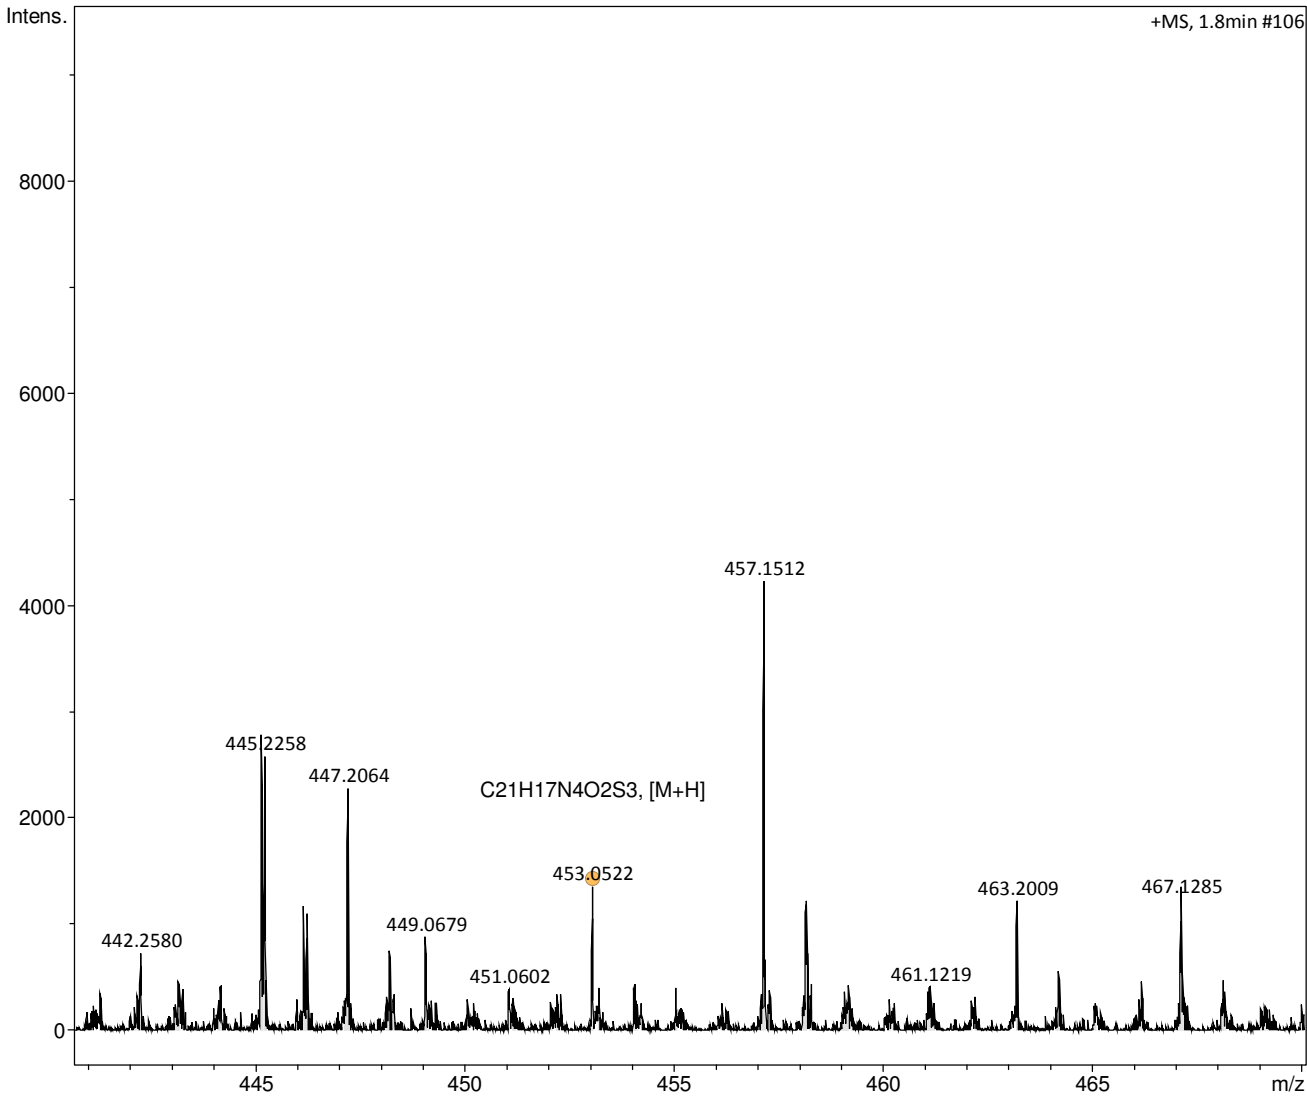

| Meas. m/z | # | Ion Formula                                                                  | Score  | m/z        | err [mDa] | err [ppm] | mSigma | rdb  | e <sup>-</sup> | Conf | N-Rule | Adduct |
|-----------|---|------------------------------------------------------------------------------|--------|------------|-----------|-----------|--------|------|----------------|------|--------|--------|
| 453.05229 | 1 | C <sub>21</sub> H <sub>17</sub> N <sub>4</sub> O <sub>2</sub> S <sub>3</sub> | 100.00 | 453.050815 | -1.4      | -3.1      | 63.3   | 15.5 | even           |      | ok     | M+H    |

Savitribai Phule Pune University - Central Instrumentation Facility

Analysis Info

Analysis Name D:\Data\2024\AUG\SPPU COLLEGE\S. P. COLLEGE\PROF. PRAVIN MHASKE\SG23\_RA2\_01\_7859.d  
 Method dlc\_ms20-1200mz\_10min\_0.120ml flow\_90b\_july 2024.m Analyst : Nitin S. Kadam CIF  
 Sample Name SG23 Instrument impact HD 1819696.00184

Acquisition Date 8/16/2024 6:07:30 PM

Acquisition Parameter

|             |          |                      |          |                  |           |
|-------------|----------|----------------------|----------|------------------|-----------|
| Source Type | ESI      | Ion Polarity         | Positive | Set Nebulizer    | 0.9 Bar   |
| Focus       | Active   | Set Capillary        | 4500 V   | Set Dry Heater   | 200 °C    |
| Scan Begin  | 20 m/z   | Set End Plate Offset | -500 V   | Set Dry Gas      | 7.0 l/min |
| Scan End    | 1200 m/z | Set Charging Voltage | 2000 V   | Set Divert Valve | Source    |
|             |          | Set Corona           | 0 nA     | Set APCI Heater  | 0 °C      |

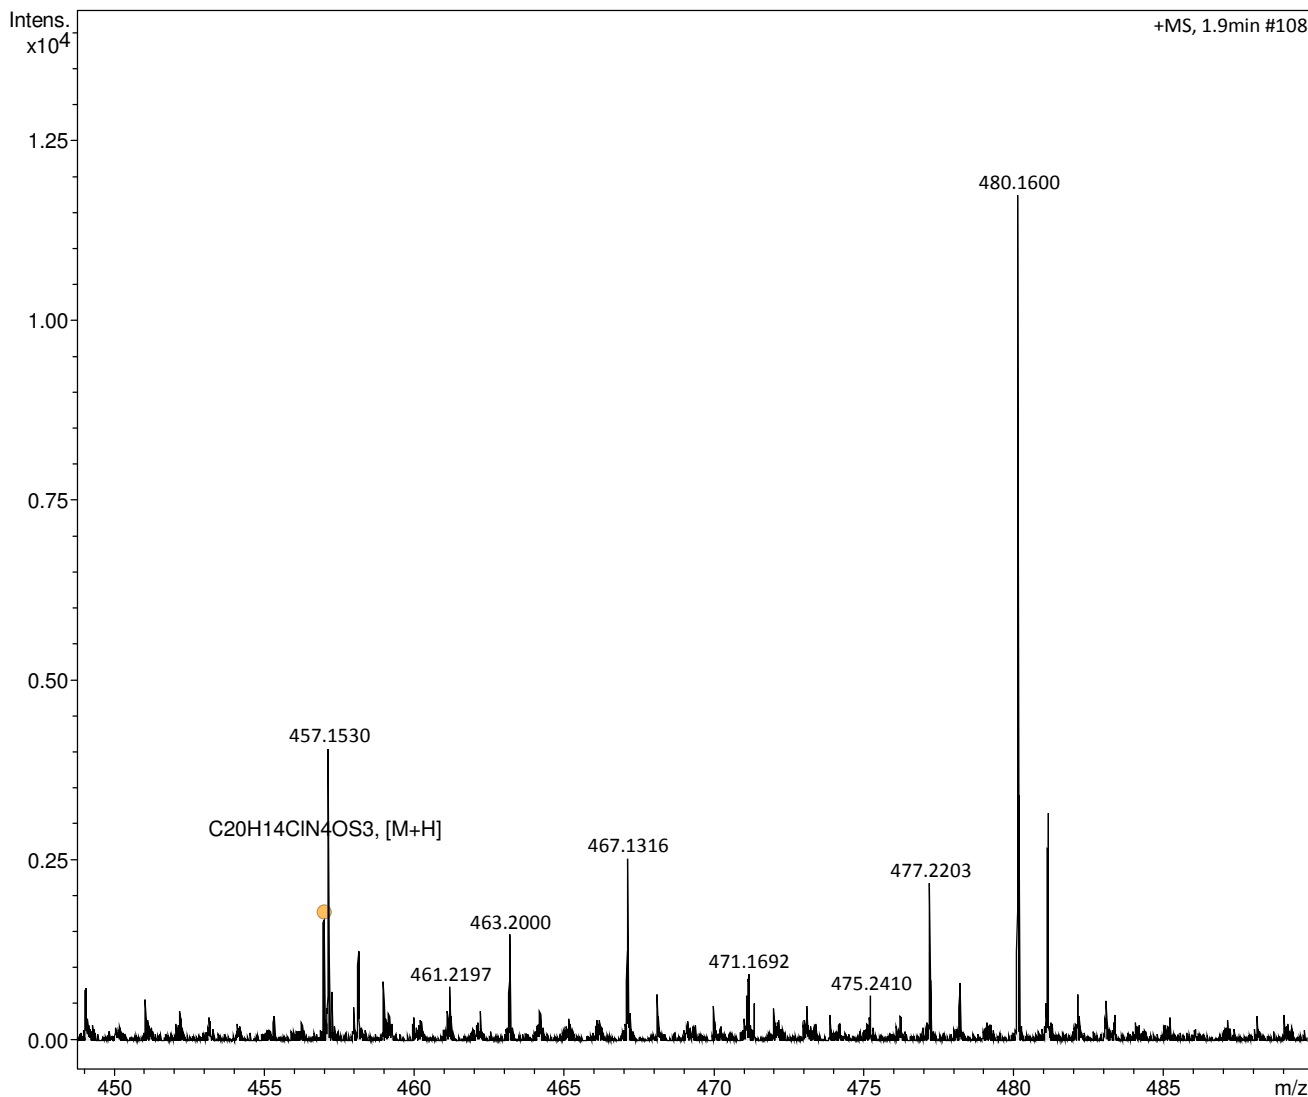

| Meas. m/z  | # | Ion Formula                                                      | Score  | m/z        | err [mDa] | err [ppm] | mSigma | rdb  | e <sup>-</sup> | Conf | N-Rule | Adduct |
|------------|---|------------------------------------------------------------------|--------|------------|-----------|-----------|--------|------|----------------|------|--------|--------|
| 457.002552 | 1 | C <sub>20</sub> H <sub>14</sub> CIN <sub>4</sub> OS <sub>3</sub> | 100.00 | 457.001278 | -1.3      | -2.8      | 54.6   | 15.5 | even           |      | ok     | M+H    |

Savitribai Phule Pune University - Central Instrumentation Facility

Analysis Info

Analysis Name D:\Data\2024\AUG\SPPU COLLEGE\S. P. COLLEGE\PROF. PRAVIN MHASKE\SG25\_RB4\_01\_7869.d  
 Method dlc\_ms20-1200mz\_10min\_0.120ml flow\_90b\_july 2024.m Analyst : Nitin S. Kadam CIF  
 Sample Name SG25 Instrument impact HD 1819696.00184

Acquisition Parameter

|             |          |                      |          |                  |           |
|-------------|----------|----------------------|----------|------------------|-----------|
| Source Type | ESI      | Ion Polarity         | Positive | Set Nebulizer    | 0.9 Bar   |
| Focus       | Active   | Set Capillary        | 4500 V   | Set Dry Heater   | 200 °C    |
| Scan Begin  | 20 m/z   | Set End Plate Offset | -500 V   | Set Dry Gas      | 7.0 l/min |
| Scan End    | 1200 m/z | Set Charging Voltage | 2000 V   | Set Divert Valve | Source    |
|             |          | Set Corona           | 0 nA     | Set APCI Heater  | 0 °C      |

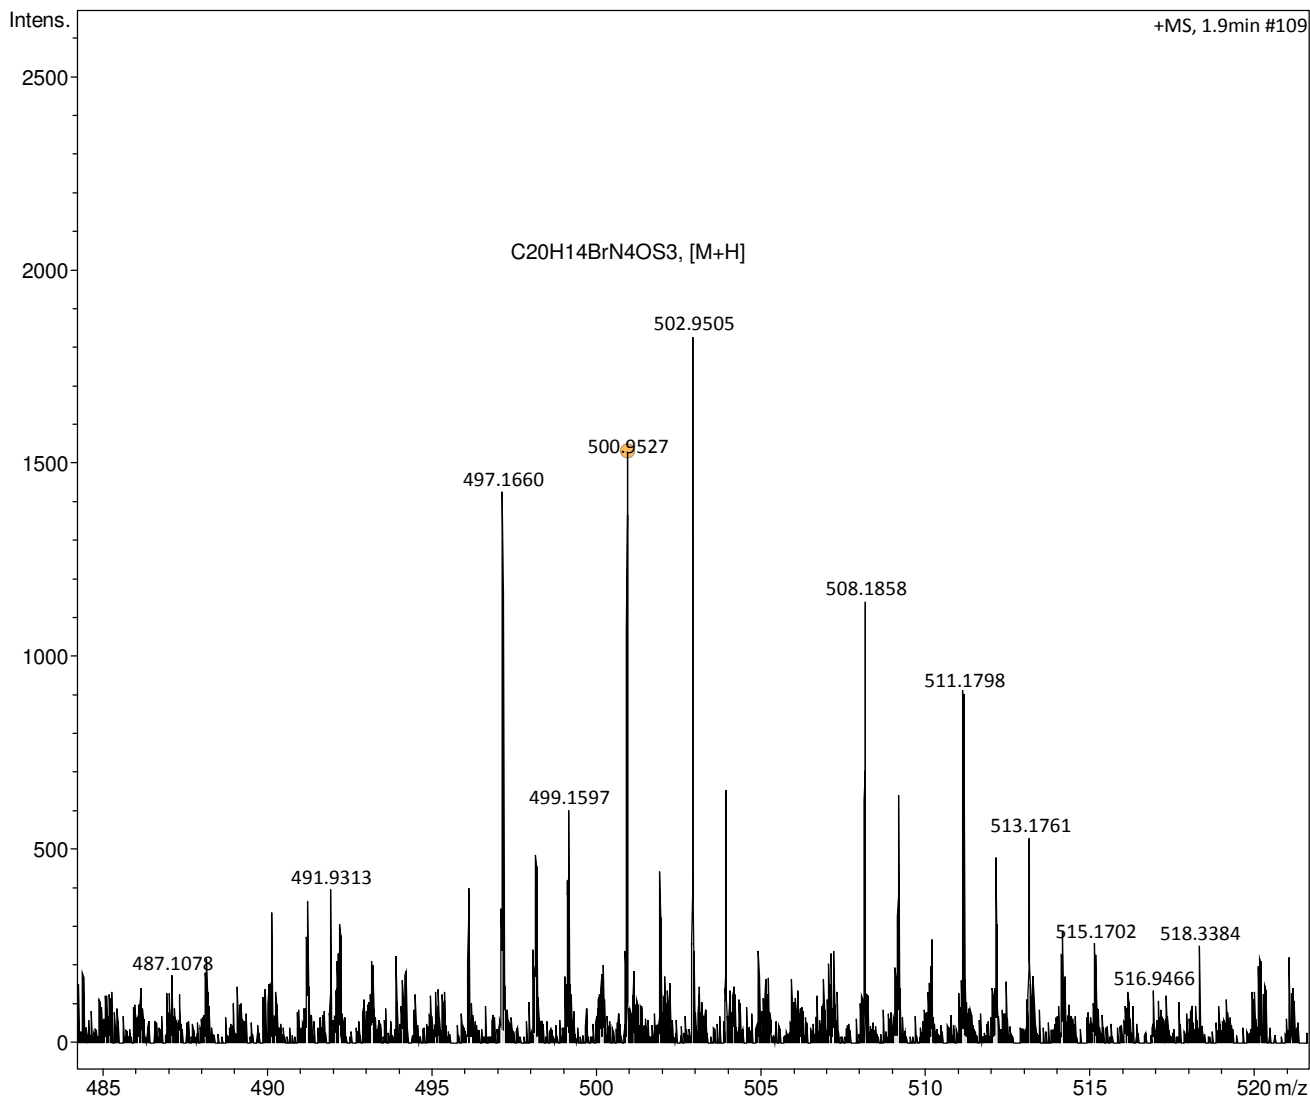

| Meas. m/z  | # | Ion Formula                                                      | Score  | m/z        | err [mDa] | err [ppm] | mSigma | rdb  | e <sup>-</sup> | Conf | N-Rule | Adduct |
|------------|---|------------------------------------------------------------------|--------|------------|-----------|-----------|--------|------|----------------|------|--------|--------|
| 500.952739 | 1 | C <sub>20</sub> H <sub>14</sub> BrN <sub>4</sub> OS <sub>3</sub> | 100.00 | 500.950763 | -2.0      | -3.9      | 55.2   | 15.5 | even           |      | ok     | M+H    |

Savitribai Phule Pune University - Central Instrumentation Facility

Analysis Info

Analysis Name D:\Data\2024\AUG\SPPU COLLEGE\S. P. COLLEGE\PROF. PRAVIN MHASKE\SG48\_RC4\_01\_7877.d  
 Method dlc\_ms20-1200mz\_10min\_0.120ml flow\_90b\_july 2024.m Analyst : Nitin S. Kadam CIF  
 Sample Name SG48 Instrument impact HD 1819696.00184

Acquisition Date 8/16/2024 9:19:35 PM

Acquisition Parameter

|             |          |                      |          |                  |           |
|-------------|----------|----------------------|----------|------------------|-----------|
| Source Type | ESI      | Ion Polarity         | Positive | Set Nebulizer    | 0.9 Bar   |
| Focus       | Active   | Set Capillary        | 4500 V   | Set Dry Heater   | 200 °C    |
| Scan Begin  | 20 m/z   | Set End Plate Offset | -500 V   | Set Dry Gas      | 7.0 l/min |
| Scan End    | 1200 m/z | Set Charging Voltage | 2000 V   | Set Divert Valve | Source    |
|             |          | Set Corona           | 0 nA     | Set APCI Heater  | 0 °C      |

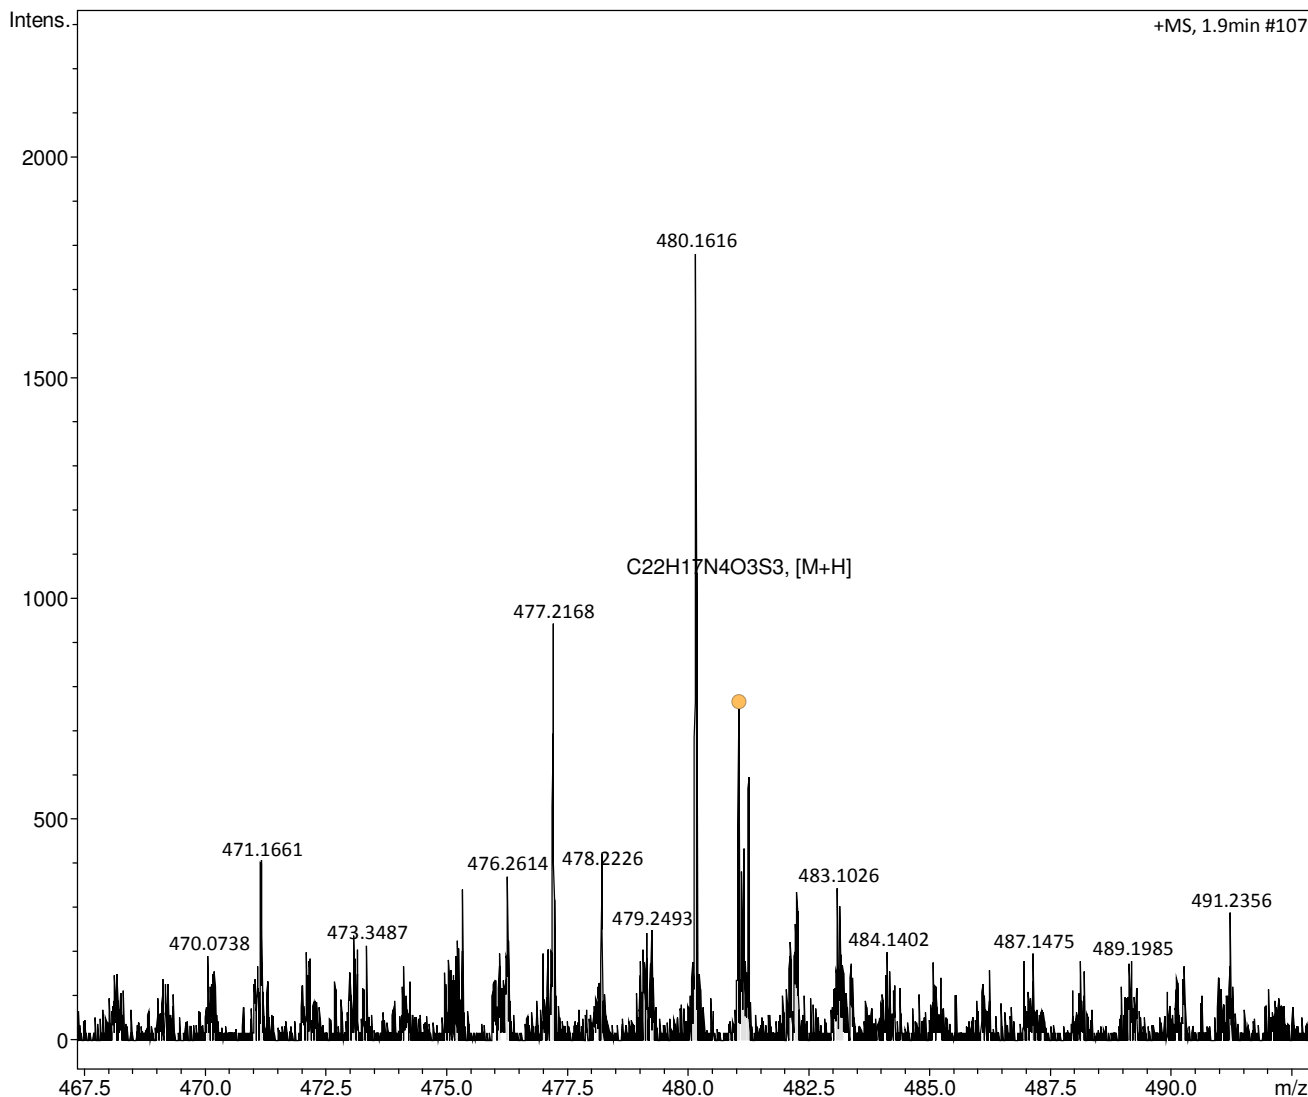

| Meas. m/z  | # | Ion Formula                                                                  | Score  | m/z        | err [mDa] | err [ppm] | mSigma | rdb  | e <sup>-</sup> | Conf | N-Rule | Adduct |
|------------|---|------------------------------------------------------------------------------|--------|------------|-----------|-----------|--------|------|----------------|------|--------|--------|
| 481.048586 | 1 | C <sub>22</sub> H <sub>17</sub> N <sub>4</sub> O <sub>3</sub> S <sub>3</sub> | 100.00 | 481.045730 | -2.9      | -5.9      | n.a.   | 16.5 | even           | ok   | M+H    |        |

# HRMS of 7h (ESI) m/z calcd for C23H18N4O3S3 [M+H]<sup>+</sup>, 494.60; found, , 495.06.

## Savitribai Phule Pune University - Central Instrumentation Facility

### Analysis Info

Acquisition Date 8/16/2024 7:22:12 PM  
Analysis Name D:\Data\2024\AUG\SPPU COLLEGE\S. P. COLLEGE\PROF. PRAVIN MHASKE\SG50\_RB1\_01\_7866.d  
Method dlc\_ms20-1200mz\_10min\_0.120ml flow\_90b\_july 2024.m Analyst : Nitin S. Kadam CIF  
Sample Name SG50 Instrument impact HD 1819696.00184

### Acquisition Parameter

|             |          |                      |          |                  |           |
|-------------|----------|----------------------|----------|------------------|-----------|
| Source Type | ESI      | Ion Polarity         | Positive | Set Nebulizer    | 0.9 Bar   |
| Focus       | Active   | Set Capillary        | 4500 V   | Set Dry Heater   | 200 °C    |
| Scan Begin  | 20 m/z   | Set End Plate Offset | -500 V   | Set Dry Gas      | 7.0 l/min |
| Scan End    | 1200 m/z | Set Charging Voltage | 2000 V   | Set Divert Valve | Source    |
|             |          | Set Corona           | 0 nA     | Set APCI Heater  | 0 °C      |

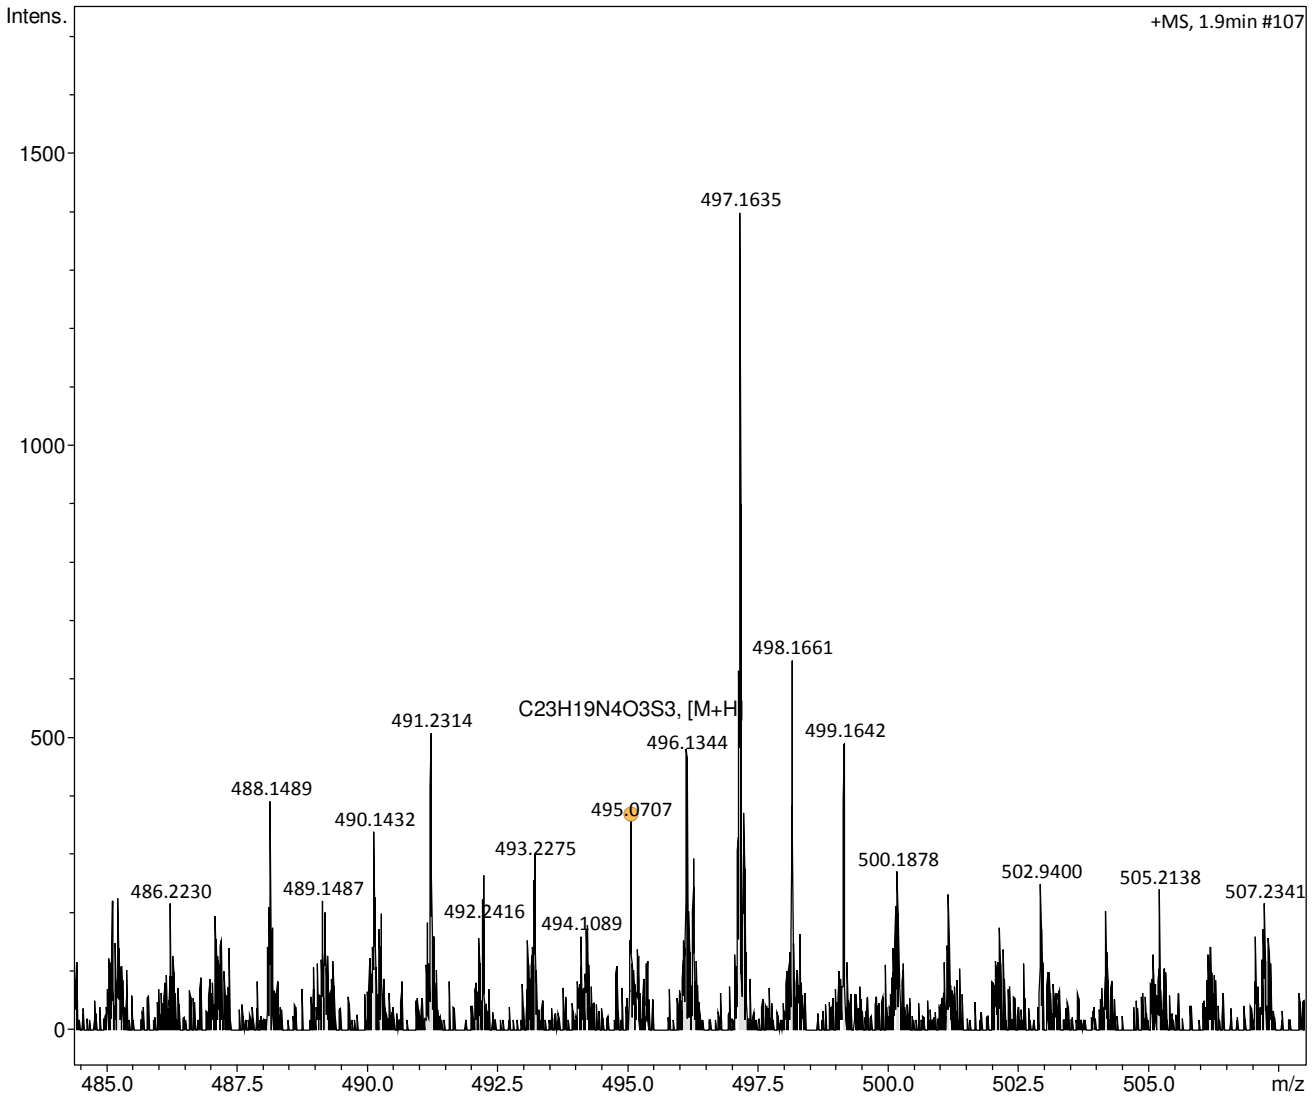

| Meas. m/z  | # | Ion Formula  | Score  | m/z        | err [mDa] | err [ppm] | mSigma | rdb  | e <sup>-</sup> | Conf | N-Rule | Adduct |
|------------|---|--------------|--------|------------|-----------|-----------|--------|------|----------------|------|--------|--------|
| 495.070743 | 1 | C23H19N4O3S3 | 100.00 | 495.061380 | -9.4      | -18.9     | 95.3   | 16.5 | even           |      | ok     | M+H    |

Savitribai Phule Pune University - Central Instrumentation Facility

Analysis Info

Analysis Name D:\Data\2024\AUG\SPPU COLLEGE\S. P. COLLEGE\PROF. PRAVIN MHASKE\SG55\_RB5\_01\_7870.d  
 Method dlc\_ms20-1200mz\_10min\_0.120ml flow\_90b\_july 2024.m Analyst : Nitin S. Kadam CIF  
 Sample Name SG55 Instrument impact HD 1819696.00184

Acquisition Date 8/16/2024 8:04:51 PM

Acquisition Parameter

|             |          |                      |          |                  |           |
|-------------|----------|----------------------|----------|------------------|-----------|
| Source Type | ESI      | Ion Polarity         | Positive | Set Nebulizer    | 0.9 Bar   |
| Focus       | Active   | Set Capillary        | 4500 V   | Set Dry Heater   | 200 °C    |
| Scan Begin  | 20 m/z   | Set End Plate Offset | -500 V   | Set Dry Gas      | 7.0 l/min |
| Scan End    | 1200 m/z | Set Charging Voltage | 2000 V   | Set Divert Valve | Source    |
|             |          | Set Corona           | 0 nA     | Set APCI Heater  | 0 °C      |

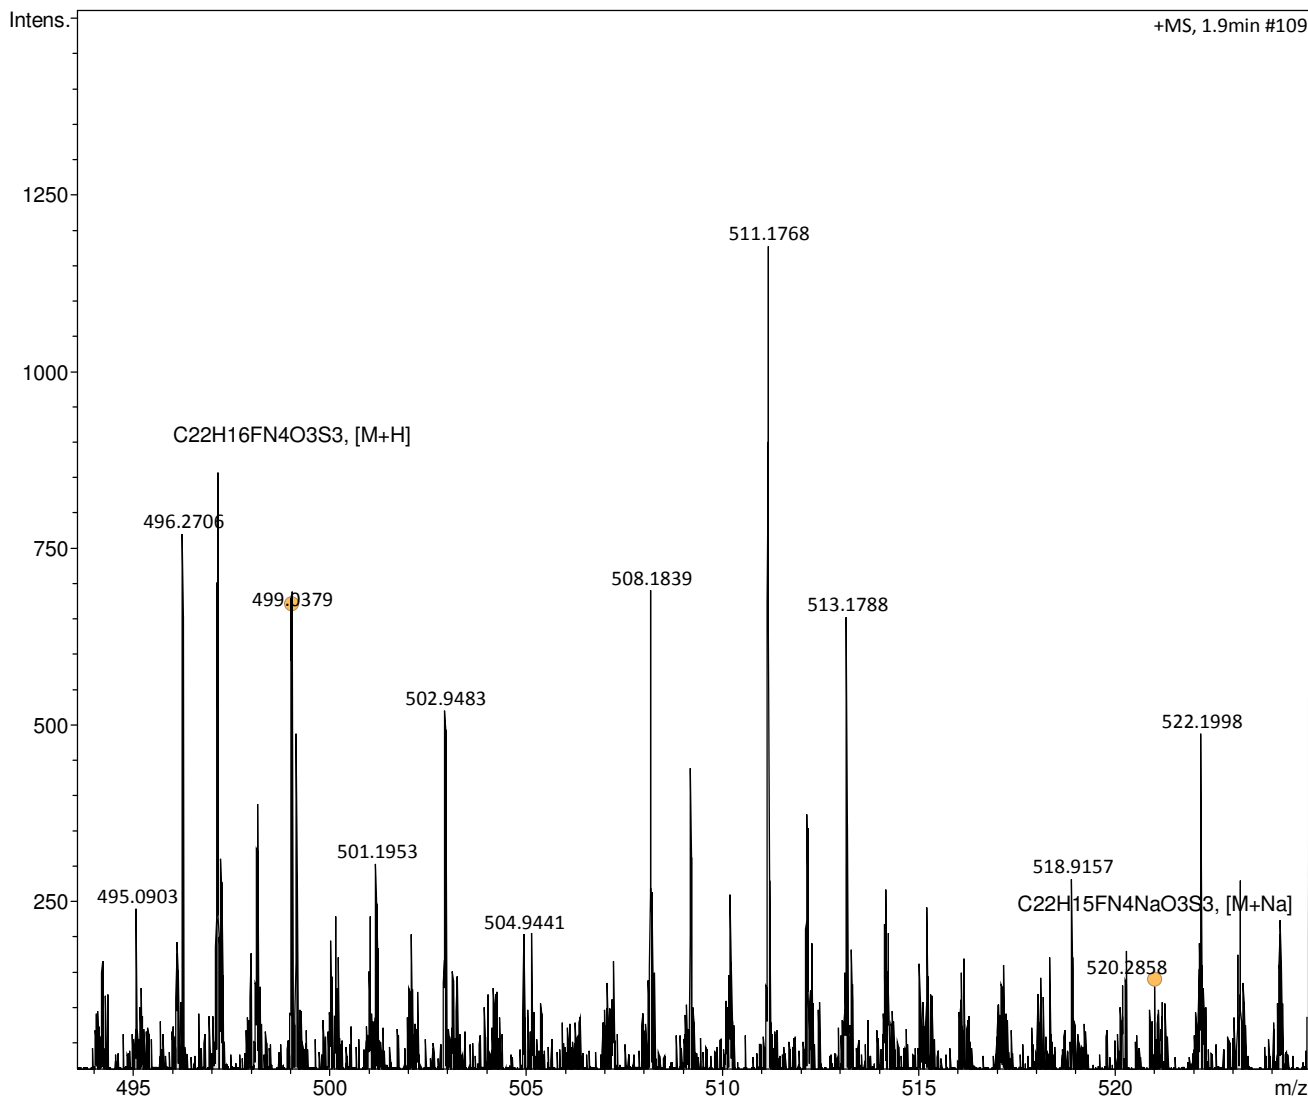

| Meas. m/z  | # | Ion Formula     | Score  | m/z        | err [mDa] | err [ppm] | mSigma | rdb  | e <sup>-</sup> | Conf | N-Rule | Adduct |
|------------|---|-----------------|--------|------------|-----------|-----------|--------|------|----------------|------|--------|--------|
| 499.037945 | 1 | C22H16FN4O3S3   | 100.00 | 499.036308 | -1.6      | -3.3      | 102.8  | 16.5 | even           |      | ok     | M+H    |
| 521.017335 | 1 | C22H15FN4NaO3S3 | 100.00 | 521.018252 | 0.9       | 1.8       | 466.2  | 16.5 | even           |      | ok     | M+Na   |
|            | 1 | C22H15FN4NaO3S3 | 100.00 | 521.018252 | 0.9       | 1.8       | 466.2  | 16.5 | even           |      | ok     | M+Na   |

Savitribai Phule Pune University - Central Instrumentation Facility

Analysis Info

Analysis Name D:\Data\2024\AUG\SPPU COLLEGE\S. P. COLLEGE\PROF. PRAVIN MHASKE\SG51\_RC3\_01\_7876.d  
 Method dlc\_ms20-1200mz\_10min\_0.120ml flow\_90b\_july 2024.m Analyst : Nitin S. Kadam CIF  
 Sample Name SG51 Instrument impact HD 1819696.00184

Acquisition Date 8/16/2024 9:08:54 PM

Acquisition Parameter

|             |          |                      |          |                  |           |
|-------------|----------|----------------------|----------|------------------|-----------|
| Source Type | ESI      | Ion Polarity         | Positive | Set Nebulizer    | 0.9 Bar   |
| Focus       | Active   | Set Capillary        | 4500 V   | Set Dry Heater   | 200 °C    |
| Scan Begin  | 20 m/z   | Set End Plate Offset | -500 V   | Set Dry Gas      | 7.0 l/min |
| Scan End    | 1200 m/z | Set Charging Voltage | 2000 V   | Set Divert Valve | Source    |
|             |          | Set Corona           | 0 nA     | Set APCI Heater  | 0 °C      |

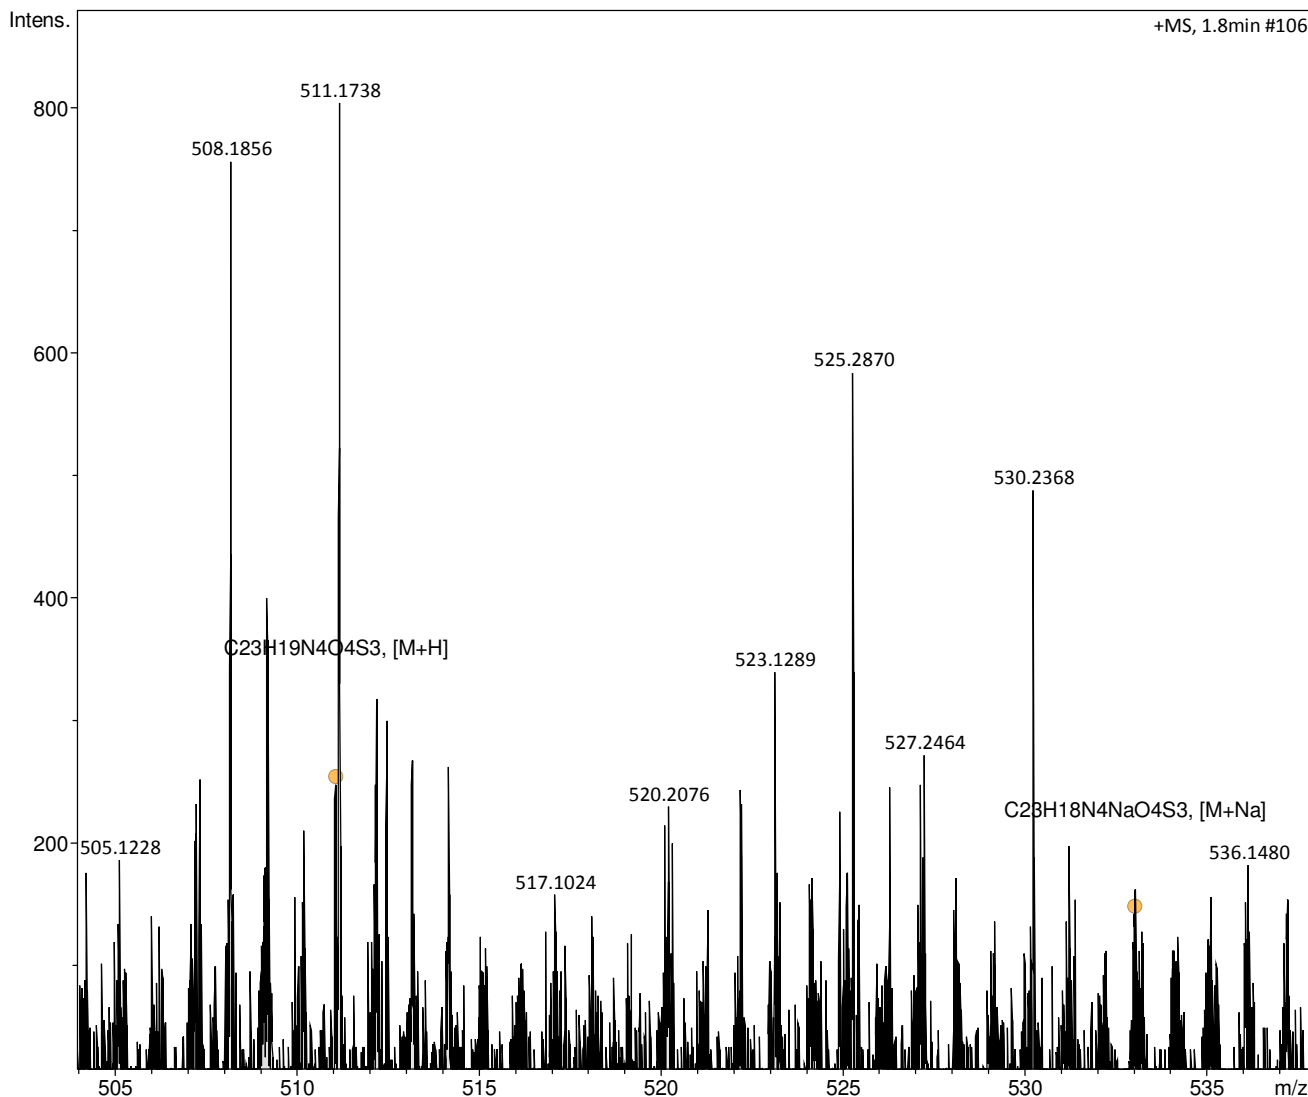

| Meas. m/z  | # | Ion Formula                                                                    | Score  | m/z        | err [mDa] | err [ppm] | mSigma | rdb  | e <sup>-</sup> | Conf | N-Rule | Adduct |
|------------|---|--------------------------------------------------------------------------------|--------|------------|-----------|-----------|--------|------|----------------|------|--------|--------|
| 511.060893 | 1 | C <sub>23</sub> H <sub>19</sub> N <sub>4</sub> O <sub>4</sub> S <sub>3</sub>   | 100.00 | 511.056295 | -4.6      | -9.0      | 120.8  | 16.5 | even           | ok   | M+H    |        |
| 533.029607 | 1 | C <sub>23</sub> H <sub>18</sub> N <sub>4</sub> NaO <sub>4</sub> S <sub>3</sub> | 100.00 | 533.038239 | 8.6       | 16.2      | 384.1  | 16.5 | even           | ok   | M+Na   |        |
|            | 1 | C <sub>23</sub> H <sub>18</sub> N <sub>4</sub> NaO <sub>4</sub> S <sub>3</sub> | 100.00 | 533.038239 | 8.6       | 16.2      | 384.1  | 16.5 | even           | ok   | M+Na   |        |



Savitribai Phule Pune University - Central Instrumentation Facility

Analysis Info

Acquisition Date 8/16/2024 8:26:12 PM  
 Analysis Name D:\Data\2024\AUG\SPPU COLLEGE\S. P. COLLEGE\PROF. PRAVIN MHASKE\SG49\_RB7\_01\_7872.d  
 Method dlc\_ms20-1200mz\_10min\_0.120ml flow\_90b\_july 2024.m Analyst : Nitin S. Kadam CIF  
 Sample Name SG49 Instrument impact HD 1819696.00184

Acquisition Parameter

|             |          |                      |          |                  |           |
|-------------|----------|----------------------|----------|------------------|-----------|
| Source Type | ESI      | Ion Polarity         | Positive | Set Nebulizer    | 0.9 Bar   |
| Focus       | Active   | Set Capillary        | 4500 V   | Set Dry Heater   | 200 °C    |
| Scan Begin  | 20 m/z   | Set End Plate Offset | -500 V   | Set Dry Gas      | 7.0 l/min |
| Scan End    | 1200 m/z | Set Charging Voltage | 2000 V   | Set Divert Valve | Source    |
|             |          | Set Corona           | 0 nA     | Set APCI Heater  | 0 °C      |

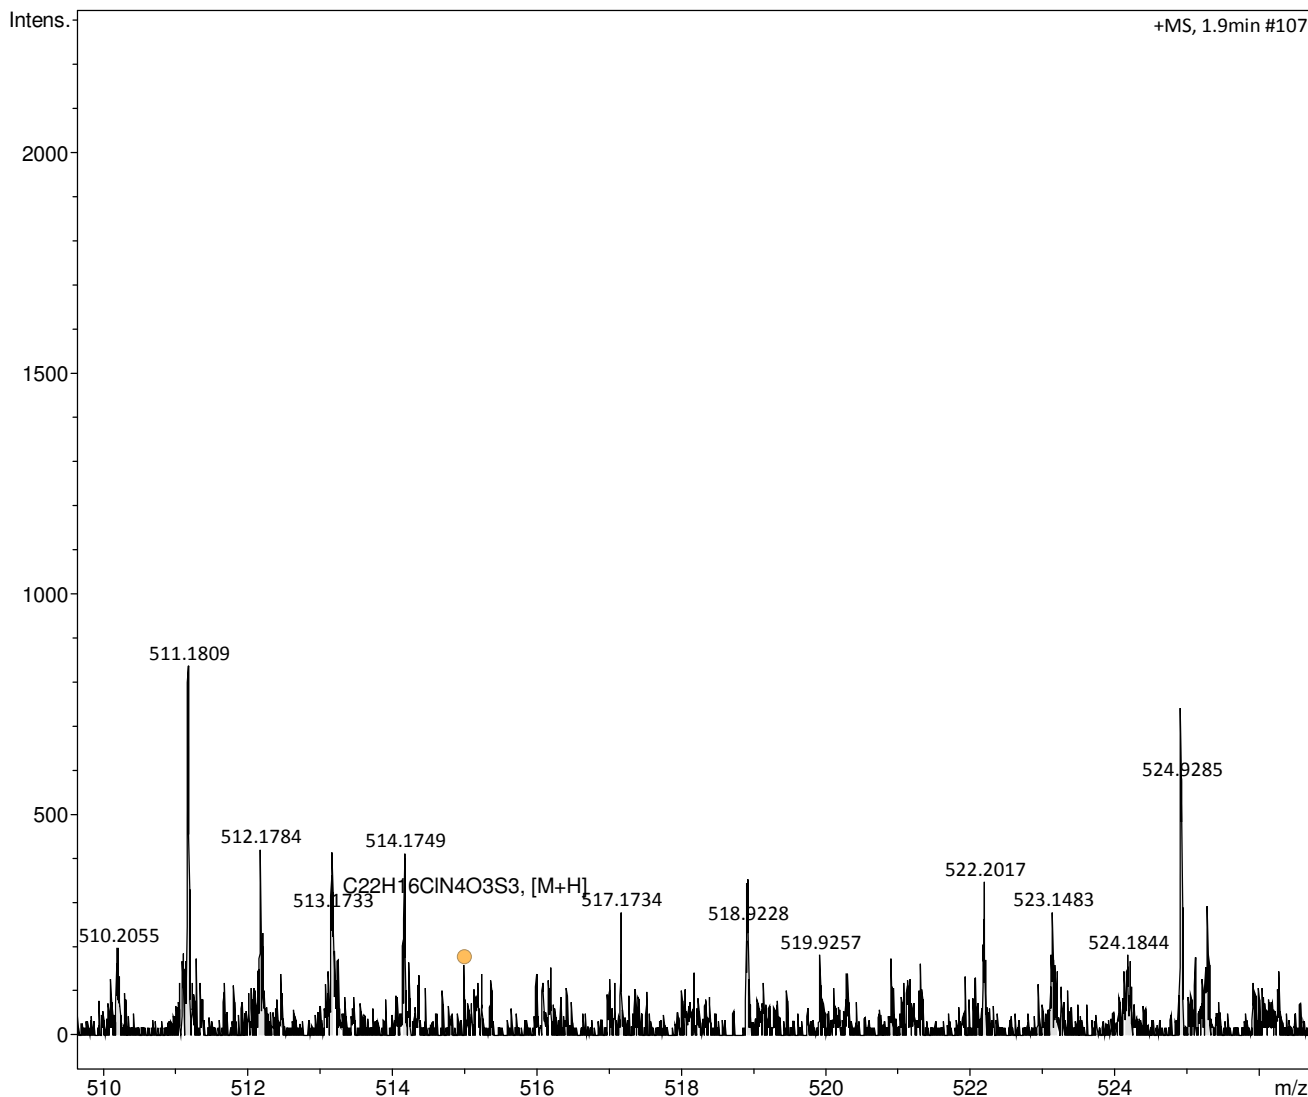

| Meas. m/z  | # | Ion Formula    | Score  | m/z err [mDa] | err [ppm] | mSigma | rdb  | e <sup>-</sup> | Conf | N-Rule | Adduct |
|------------|---|----------------|--------|---------------|-----------|--------|------|----------------|------|--------|--------|
| 515.002975 | 1 | C22H16CIN4O3S3 | 100.00 | 515.006757    | 3.8       | 7.3    | n.a. | 16.5           | even | ok     | M+H    |

Savitribai Phule Pune University - Central Instrumentation Facility

Analysis Info

Analysis Name D:\Data\2024\AUG\SPPU COLLEGE\S. P. COLLEGE\PROF. PRAVIN MHASKE\SG52\_RA6\_01\_7863.d  
 Method dlc\_ms20-1200mz\_10min\_0.120ml flow\_90b\_july 2024.m Analyst : Nitin S. Kadam CIF  
 Sample Name SG52 Instrument impact HD 1819696.00184

Acquisition Date 8/16/2024 6:50:12 PM

Acquisition Parameter

|             |          |                      |          |                  |           |
|-------------|----------|----------------------|----------|------------------|-----------|
| Source Type | ESI      | Ion Polarity         | Positive | Set Nebulizer    | 0.9 Bar   |
| Focus       | Active   | Set Capillary        | 4500 V   | Set Dry Heater   | 200 °C    |
| Scan Begin  | 20 m/z   | Set End Plate Offset | -500 V   | Set Dry Gas      | 7.0 l/min |
| Scan End    | 1200 m/z | Set Charging Voltage | 2000 V   | Set Divert Valve | Source    |
|             |          | Set Corona           | 0 nA     | Set APCI Heater  | 0 °C      |

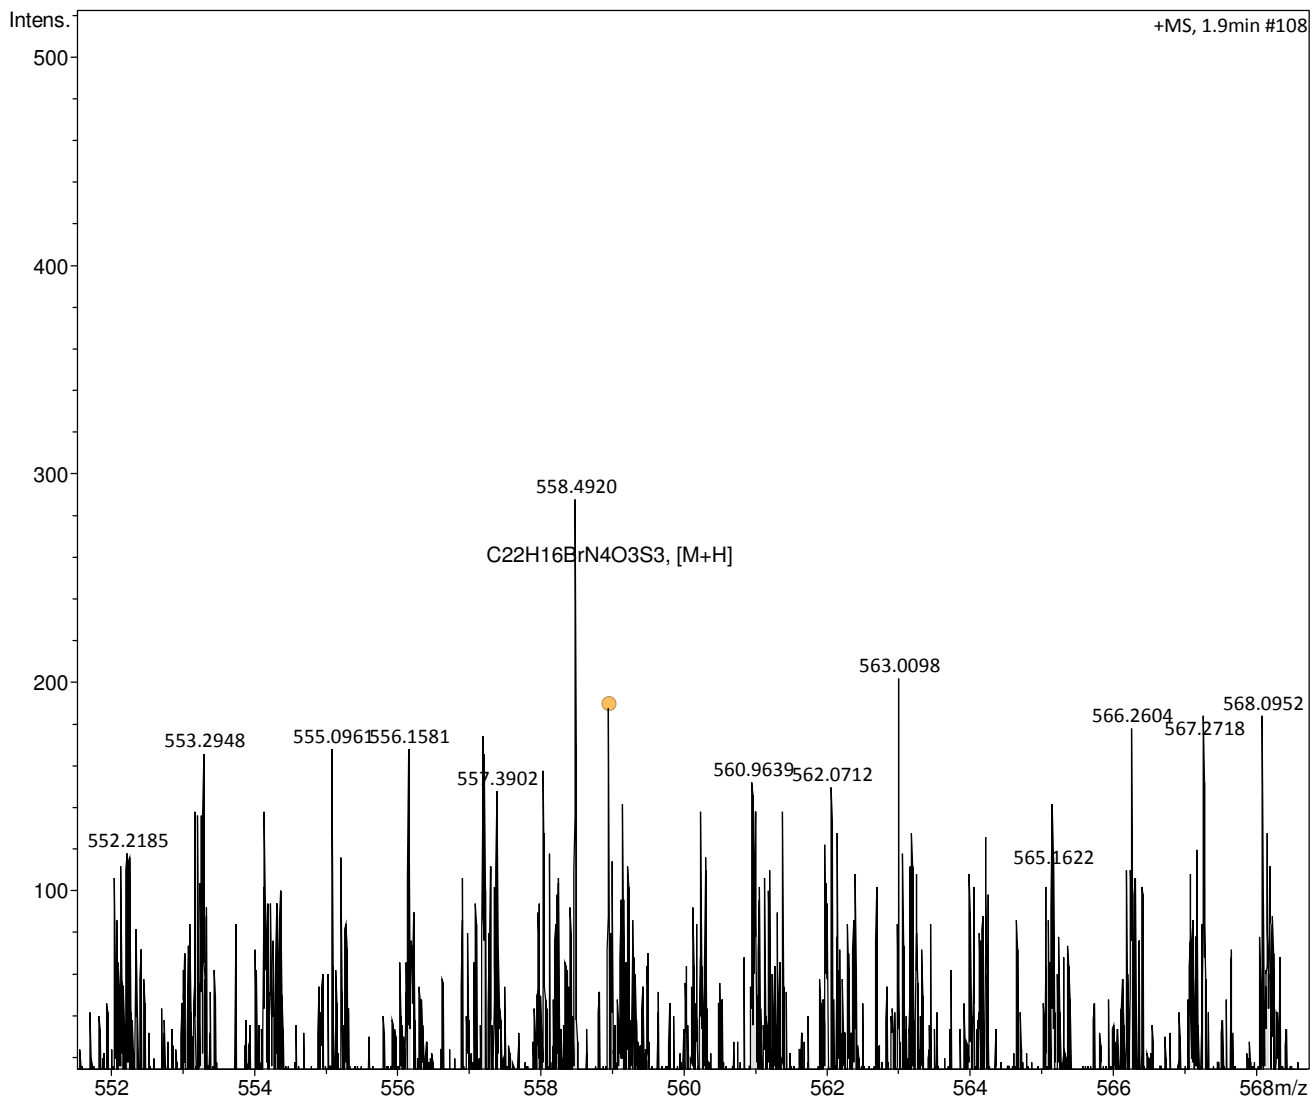

| Meas. m/z  | # | Ion Formula    | Score  | m/z        | err [mDa] | err [ppm] | mSigma | rdb  | e <sup>-</sup> | Conf | N-Rule | Adduct |
|------------|---|----------------|--------|------------|-----------|-----------|--------|------|----------------|------|--------|--------|
| 558.953197 | 1 | C22H16BrN4O3S3 | 100.00 | 558.956242 | 3.0       | 5.4       | 187.4  | 16.5 | even           |      | ok     | M+H    |

HPLC chromatogram of Blank  
HPLC chromatogram of 7a

**DEPARTMENT OF PHARMACEUTICAL CHEMISTRY  
KLE COLLEGE OF PHARMACY, BELAGAVI**

| SAMPLE INFORMATION |                            |                     |                          |
|--------------------|----------------------------|---------------------|--------------------------|
| Sample Name:       | Blank                      | Acquired By:        | User_1                   |
| Sample Type:       | Unknown                    | Sample Set Name:    | Trial1_23102024_SS       |
| Vial:              | 1                          | Acq. Method Set:    | Trial1_23102024_MS       |
| Injection #:       | 1                          | Processing Method:  | Blank Processing         |
| Injection Volume:  | 10.00 ul                   | Channel Name:       | 223.0nm                  |
| Run Time:          | 10.0 Minutes               | Proc. Chnl. Descr.: | 2998 PDA 223.0 nm (2998) |
| Date Acquired:     | 23-10-2024 11:03:20 AM IST |                     |                          |
| Date Processed:    | 25-10-2024 09:50:17 AM IST |                     |                          |

Auto-Scaled Chromatogram

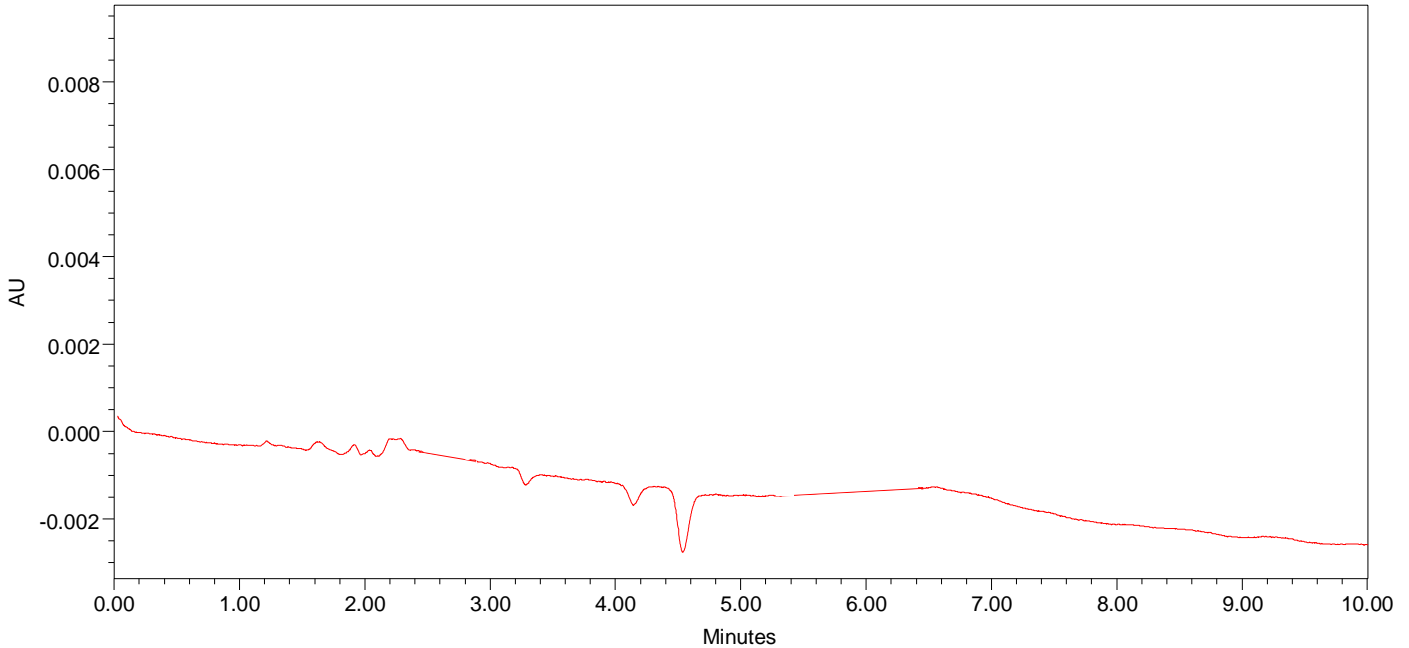

Peak Results

| Name | RT | Area | % Area |
|------|----|------|--------|
|      |    |      |        |
|      |    |      |        |

HPLC chromatogram of 7a

**DEPARTMENT OF PHARMACEUTICAL CHEMISTRY  
KLE COLLEGE OF PHARMACY, BELAGAVI**

**SAMPLE INFORMATION**

|                                            |              |                     |                          |
|--------------------------------------------|--------------|---------------------|--------------------------|
| Sample Name:                               | 7a           | Acquired By:        | User_1                   |
| Sample Type:                               | Unknown      | Sample Set Name:    | Trial1_23102024_SS       |
| Vial:                                      | 2            | Acq. Method Set:    | Trial1_23102024_MS       |
| Injection #:                               | 1            | Processing Method:  | 7a Processing            |
| Injection Volume:                          | 10.00 ul     | Channel Name:       | 223.0nm@2                |
| Run Time:                                  | 10.0 Minutes | Proc. Chnl. Descr.: | 2998 PDA 223.0 nm (2998) |
| Date Acquired: 23-10-2024 11:14:02 AM IST  |              |                     |                          |
| Date Processed: 23-10-2024 02:01:01 PM IST |              |                     |                          |

**Auto-Scaled Chromatogram**

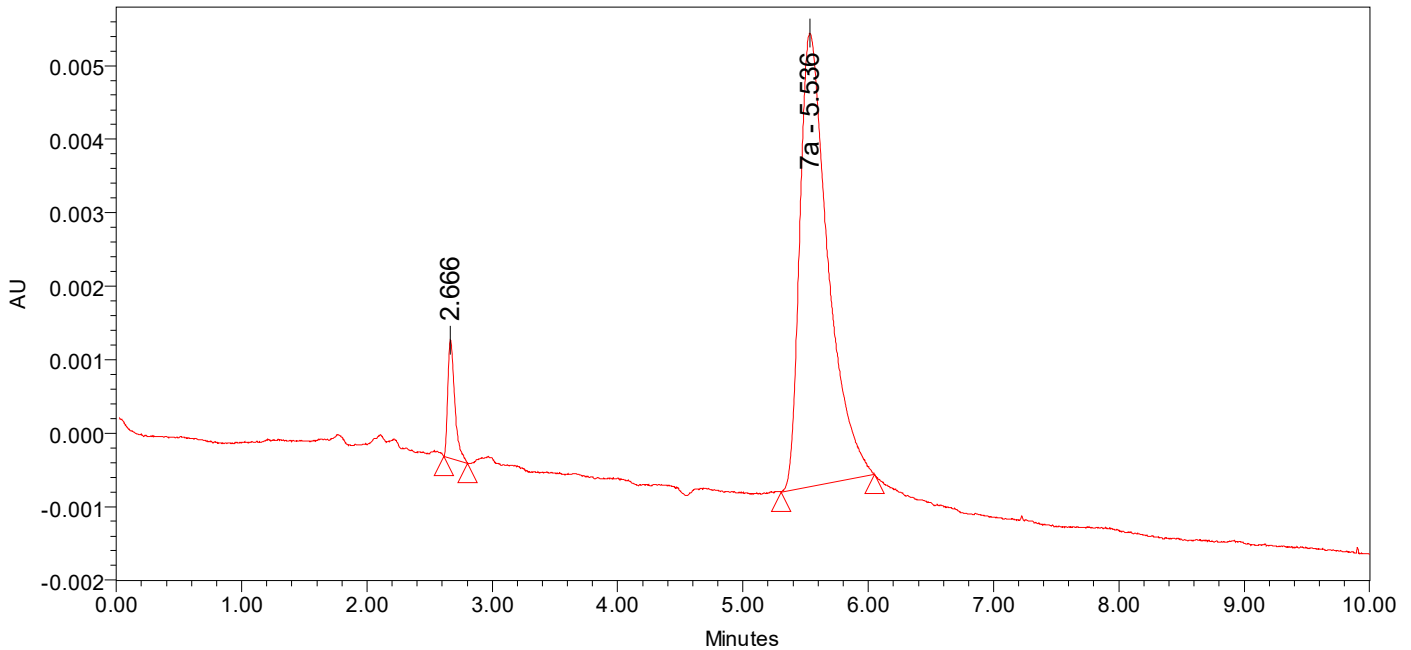

Peak Results

|   | Name | RT    | Area  | % Area |
|---|------|-------|-------|--------|
| 1 |      | 2.666 | 6166  | 6.01   |
| 2 | 7a   | 5.536 | 96359 | 93.99  |

HPLC chromatogram of 7b

**DEPARTMENT OF PHARMACEUTICAL CHEMISTRY  
KLE COLLEGE OF PHARMACY, BELAGAVI**

**SAMPLE INFORMATION**

|                   |                            |                     |                          |
|-------------------|----------------------------|---------------------|--------------------------|
| Sample Name:      | 7b                         | Acquired By:        | User_1                   |
| Sample Type:      | Unknown                    | Sample Set Name:    | Trial1_23102024_SS       |
| Vial:             | 3                          | Acq. Method Set:    | Trial1_23102024_MS       |
| Injection #:      | 1                          | Processing Method:  | 7b Processing            |
| Injection Volume: | 10.00 ul                   | Channel Name:       | 223.0nm                  |
| Run Time:         | 10.0 Minutes               | Proc. Chnl. Descr.: | 2998 PDA 223.0 nm (2998) |
| Date Acquired:    | 23-10-2024 11:24:41 AM IST |                     |                          |
| Date Processed:   | 24-10-2024 09:04:13 AM IST |                     |                          |

**Auto-Scaled Chromatogram**

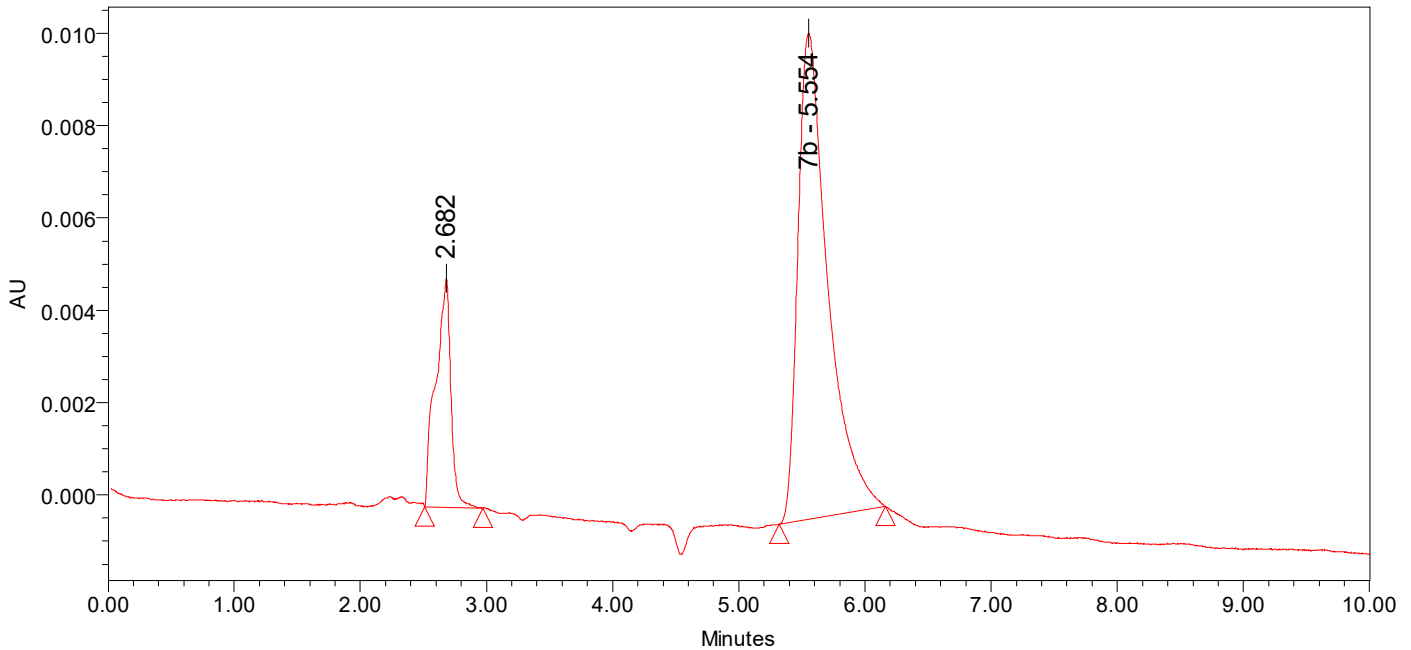

Peak Results

|   | Name | RT    | Area   | % Area |
|---|------|-------|--------|--------|
| 1 |      | 2.682 | 41639  | 19.30  |
| 2 | 7b   | 5.554 | 174055 | 80.70  |

HPLC chromatogram of 7c

**DEPARTMENT OF PHARMACEUTICAL CHEMISTRY  
KLE COLLEGE OF PHARMACY, BELAGAVI**

**SAMPLE INFORMATION**

|                   |                            |                     |                          |
|-------------------|----------------------------|---------------------|--------------------------|
| Sample Name:      | 7c                         | Acquired By:        | User_1                   |
| Sample Type:      | Unknown                    | Sample Set Name:    | Trial1_23102024_SS       |
| Vial:             | 4                          | Acq. Method Set:    | Trial1_23102024_MS       |
| Injection #:      | 1                          | Processing Method:  | 7c Processing            |
| Injection Volume: | 10.00 ul                   | Channel Name:       | 232.0nm                  |
| Run Time:         | 10.0 Minutes               | Proc. Chnl. Descr.: | 2998 PDA 232.0 nm (2998) |
| Date Acquired:    | 23-10-2024 11:35:21 AM IST |                     |                          |
| Date Processed:   | 24-10-2024 09:10:32 AM IST |                     |                          |

**Auto-Scaled Chromatogram**

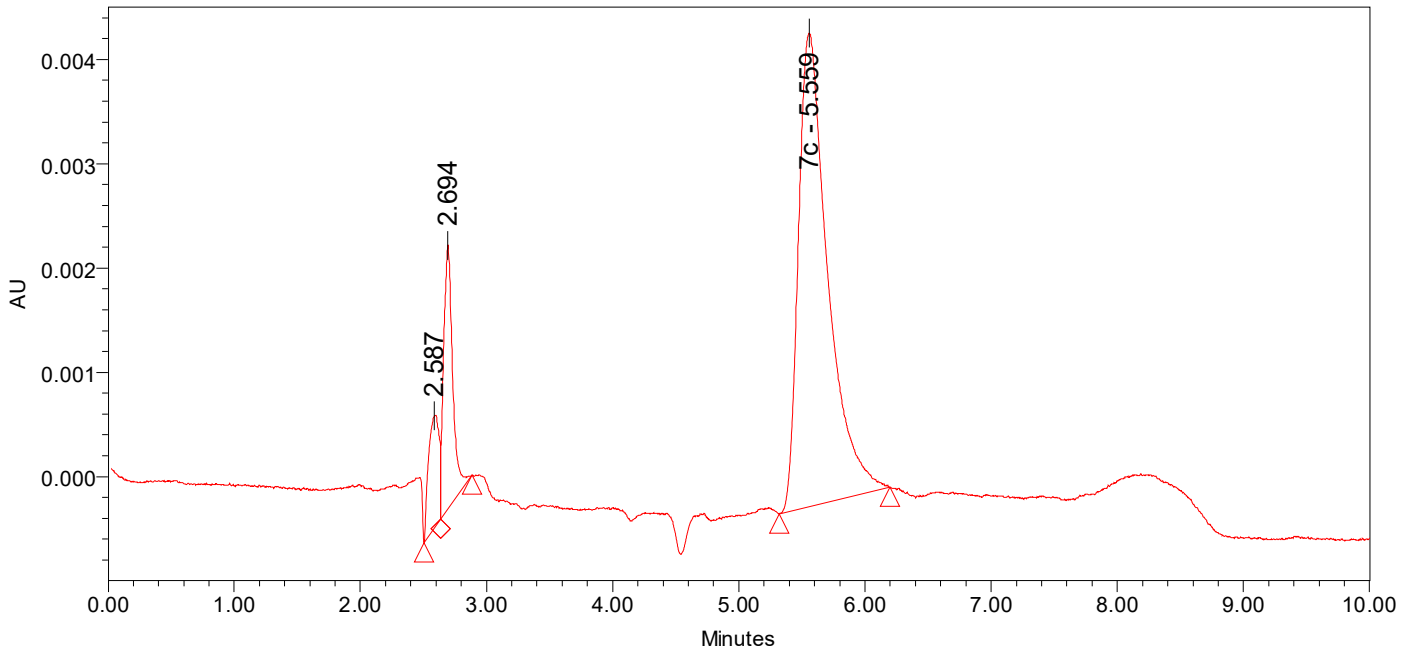

Peak Results

| Name | RT    | Area  | % Area |
|------|-------|-------|--------|
| 1    | 2.587 | 6364  | 6.85   |
| 2    | 2.694 | 12714 | 13.69  |

| Name | RT    | Area  | % Area |
|------|-------|-------|--------|
| 3 7c | 5.559 | 73771 | 79.45  |

HPLC chromatogram of 7d

**DEPARTMENT OF PHARMACEUTICAL CHEMISTRY  
KLE COLLEGE OF PHARMACY, BELAGAVI**

**SAMPLE INFORMATION**

|                   |                            |                     |                          |
|-------------------|----------------------------|---------------------|--------------------------|
| Sample Name:      | 7d                         | Acquired By:        | User_1                   |
| Sample Type:      | Unknown                    | Sample Set Name:    | Trial1_23102024_SS       |
| Vial:             | 5                          | Acq. Method Set:    | Trial1_23102024_MS       |
| Injection #:      | 1                          | Processing Method:  | 7d Processing            |
| Injection Volume: | 10.00 ul                   | Channel Name:       | 223.5nm                  |
| Run Time:         | 10.0 Minutes               | Proc. Chnl. Descr.: | 2998 PDA 223.5 nm (2998) |
| Date Acquired:    | 23-10-2024 11:46:05 AM IST |                     |                          |
| Date Processed:   | 25-10-2024 09:16:27 AM IST |                     |                          |

**Auto-Scaled Chromatogram**

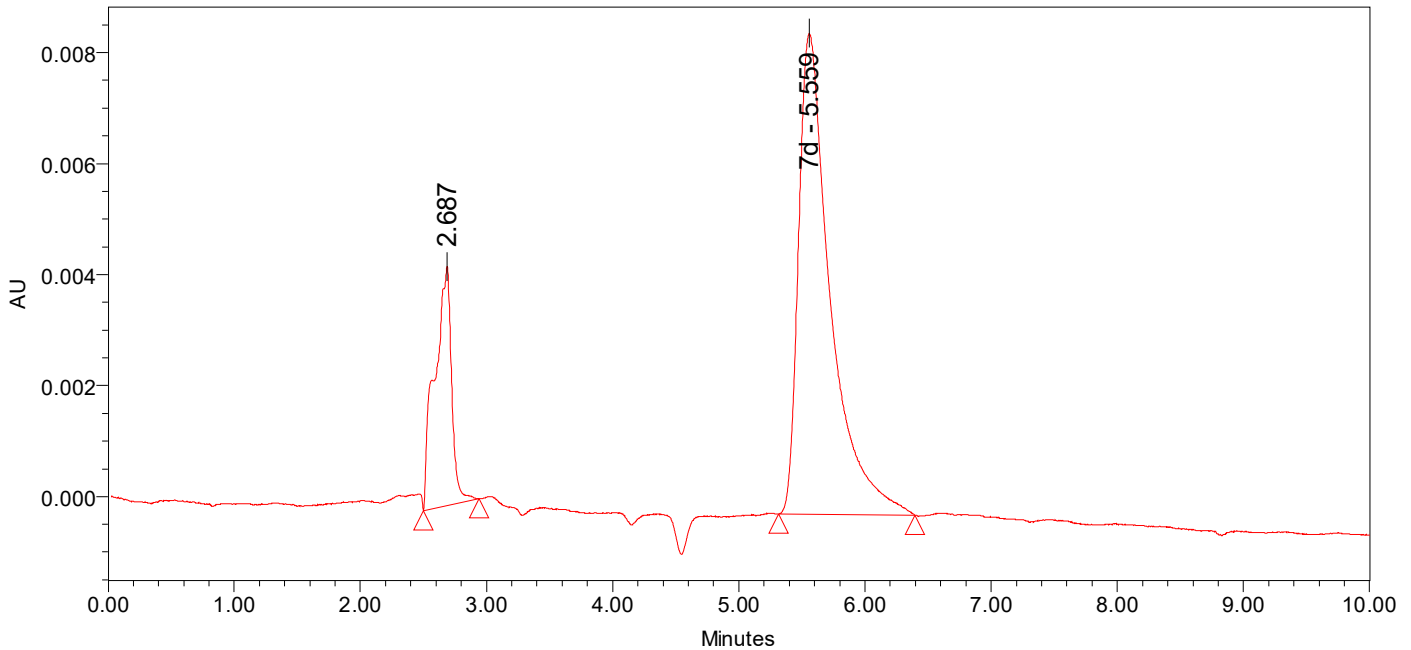

Peak Results

|   | Name | RT    | Area   | % Area |
|---|------|-------|--------|--------|
| 1 |      | 2.687 | 40146  | 20.91  |
| 2 | 7d   | 5.559 | 151855 | 79.09  |

HPLC chromatogram of 7e

**DEPARTMENT OF PHARMACEUTICAL CHEMISTRY  
KLE COLLEGE OF PHARMACY, BELAGAVI**

**SAMPLE INFORMATION**

|                   |                            |                     |                          |
|-------------------|----------------------------|---------------------|--------------------------|
| Sample Name:      | 7e                         | Acquired By:        | User_1                   |
| Sample Type:      | Unknown                    | Sample Set Name:    | Trial1_23102024_SS       |
| Vial:             | 1                          | Acq. Method Set:    | Trial1_23102024_MS       |
| Injection #:      | 1                          | Processing Method:  | 7e Processing            |
| Injection Volume: | 10.00 ul                   | Channel Name:       | 223.0nm                  |
| Run Time:         | 10.0 Minutes               | Proc. Chnl. Descr.: | 2998 PDA 223.0 nm (2998) |
| Date Acquired:    | 23-10-2024 11:56:45 AM IST |                     |                          |
| Date Processed:   | 25-10-2024 09:59:15 AM IST |                     |                          |

**Auto-Scaled Chromatogram**

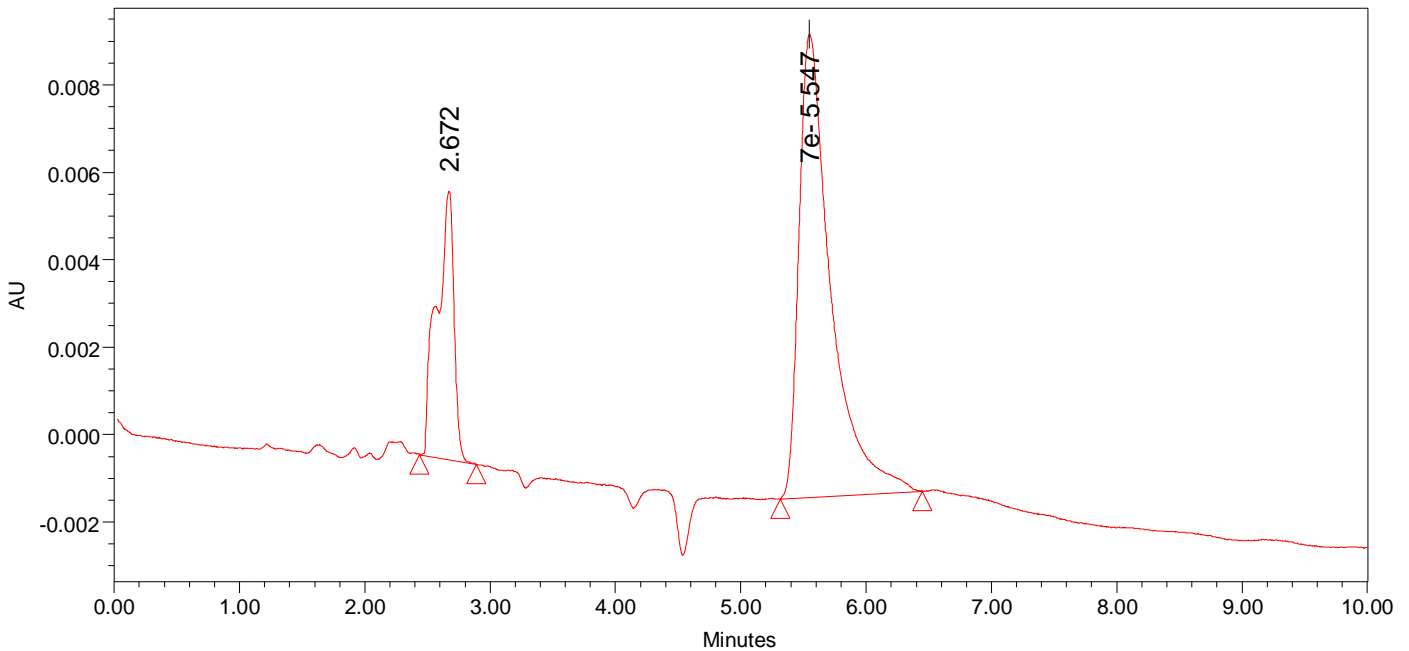

Peak Results

|   | Name | RT    | Area   | % Area |
|---|------|-------|--------|--------|
| 1 |      | 2.672 | 58185  | 23.73  |
| 2 | 7e   | 5.547 | 187038 | 76.27  |



HPLC chromatogram of 7f

**DEPARTMENT OF PHARMACEUTICAL CHEMISTRY  
KLE COLLEGE OF PHARMACY, BELAGAVI**

**SAMPLE INFORMATION**

|                                            |              |                     |                          |
|--------------------------------------------|--------------|---------------------|--------------------------|
| Sample Name:                               | 7f           | Acquired By:        | User_1                   |
| Sample Type:                               | Unknown      | Sample Set Name:    | Trial1_23102024_SS       |
| Vial:                                      | 7            | Acq. Method Set:    | Trial1_23102024_MS       |
| Injection #:                               | 1            | Processing Method:  | 7f processing            |
| Injection Volume:                          | 10.00 ul     | Channel Name:       | 232.0nm                  |
| Run Time:                                  | 10.0 Minutes | Proc. Chnl. Descr.: | 2998 PDA 232.0 nm (2998) |
| Date Acquired: 23-10-2024 12:07:26 PM IST  |              |                     |                          |
| Date Processed: 24-10-2024 09:58:47 AM IST |              |                     |                          |

**Auto-Scaled Chromatogram**

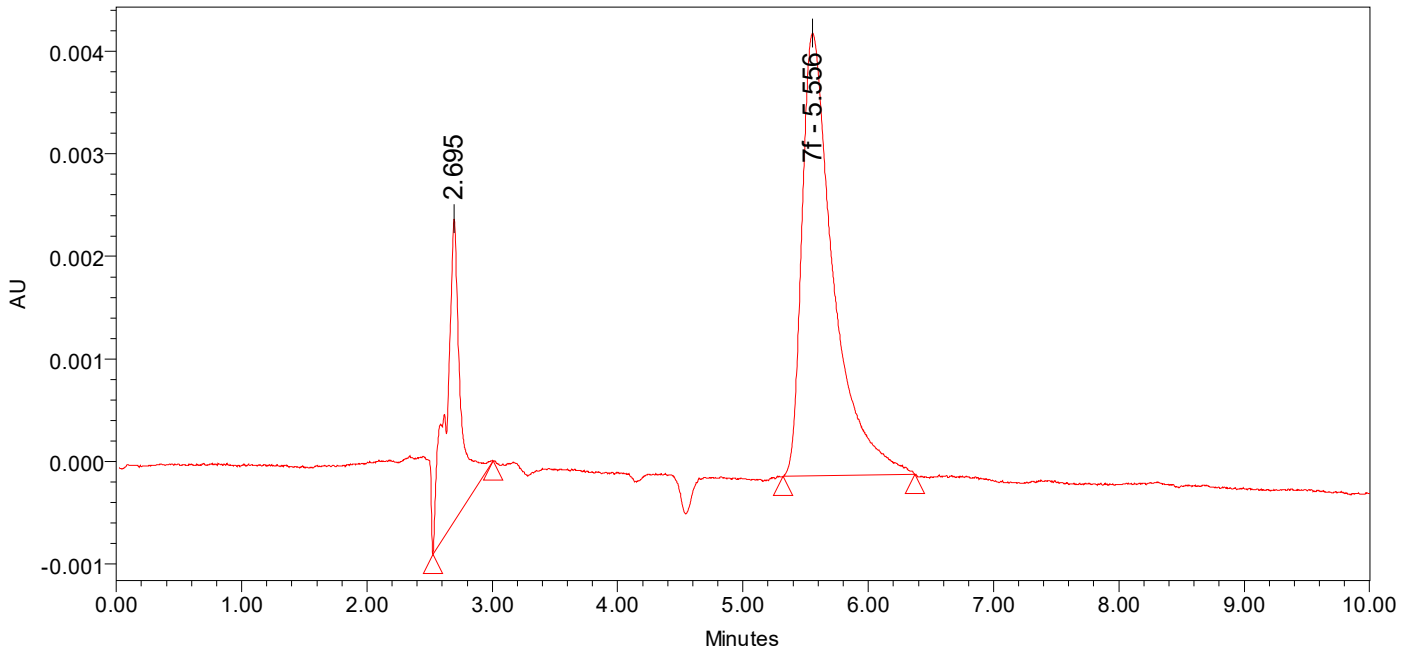

Peak Results

|   | Name | RT    | Area  | % Area |
|---|------|-------|-------|--------|
| 1 |      | 2.695 | 23818 | 24.05  |
| 2 | 7f   | 5.556 | 75212 | 75.95  |

HPLC chromatogram of 7g

**DEPARTMENT OF PHARMACEUTICAL CHEMISTRY  
KLE COLLEGE OF PHARMACY, BELAGAVI**

**SAMPLE INFORMATION**

|                   |                            |                     |                          |
|-------------------|----------------------------|---------------------|--------------------------|
| Sample Name:      | 7g                         | Acquired By:        | User_1                   |
| Sample Type:      | Unknown                    | Sample Set Name:    | Trial1_23102024_SS       |
| Vial:             | 8                          | Acq. Method Set:    | Trial1_23102024_MS       |
| Injection #:      | 1                          | Processing Method:  | 7g processing            |
| Injection Volume: | 10.00 ul                   | Channel Name:       | 223.0nm                  |
| Run Time:         | 10.0 Minutes               | Proc. Chnl. Descr.: | 2998 PDA 223.0 nm (2998) |
| Date Acquired:    | 23-10-2024 12:18:07 PM IST |                     |                          |
| Date Processed:   | 25-10-2024 09:24:58 AM IST |                     |                          |

**Auto-Scaled Chromatogram**

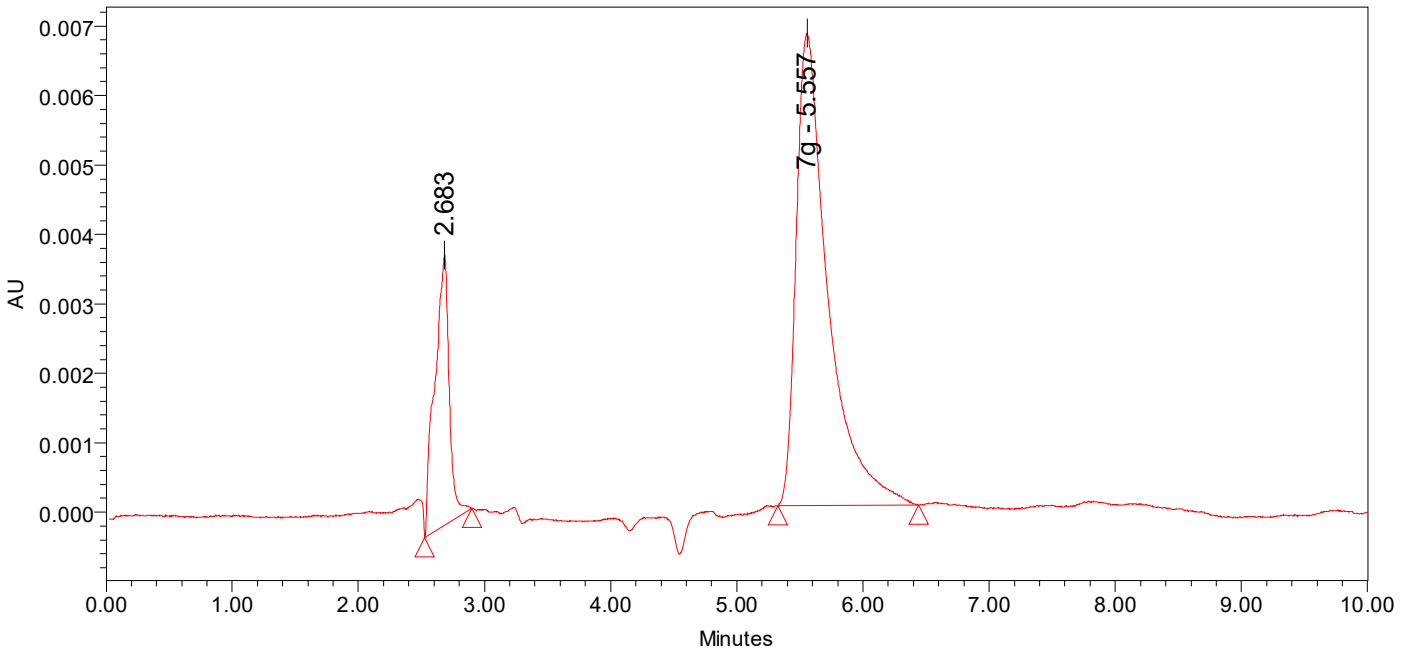

Peak Results

|   | Name | RT    | Area   | % Area |
|---|------|-------|--------|--------|
| 1 |      | 2.683 | 31120  | 20.72  |
| 2 | 7g   | 5.557 | 119107 | 79.28  |

HPLC chromatogram of 7h

**DEPARTMENT OF PHARMACEUTICAL CHEMISTRY  
KLE COLLEGE OF PHARMACY, BELAGAVI**

**SAMPLE INFORMATION**

|                                            |              |                     |                          |
|--------------------------------------------|--------------|---------------------|--------------------------|
| Sample Name:                               | 7h           | Acquired By:        | User_1                   |
| Sample Type:                               | Unknown      | Sample Set Name:    | Trial1_23102024_SS       |
| Vial:                                      | 9            | Acq. Method Set:    | Trial1_23102024_MS       |
| Injection #:                               | 1            | Processing Method:  | 7h Processing            |
| Injection Volume:                          | 10.00 ul     | Channel Name:       | 223.0nm                  |
| Run Time:                                  | 10.0 Minutes | Proc. Chnl. Descr.: | 2998 PDA 223.0 nm (2998) |
| Date Acquired: 23-10-2024 12:28:47 PM IST  |              |                     |                          |
| Date Processed: 25-10-2024 09:27:27 AM IST |              |                     |                          |

**Auto-Scaled Chromatogram**

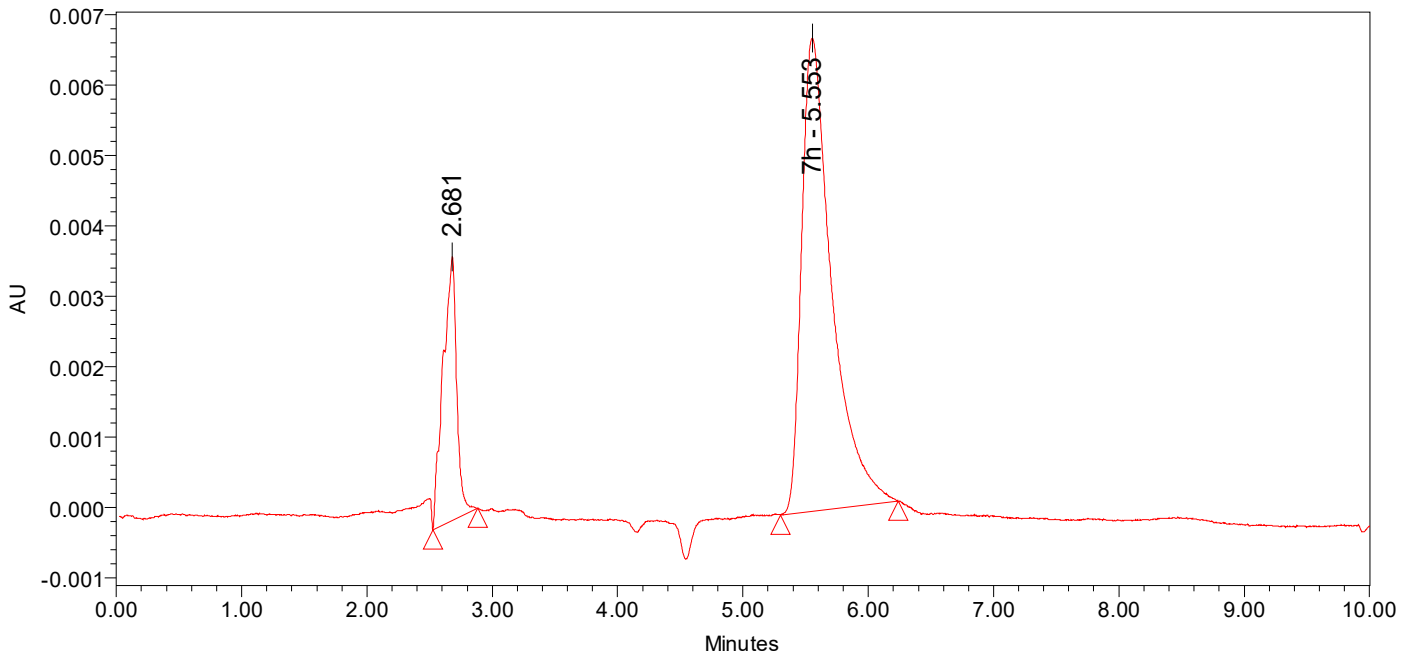

Peak Results

|   | Name | RT    | Area   | % Area |
|---|------|-------|--------|--------|
| 1 |      | 2.681 | 28132  | 20.02  |
| 2 | 7h   | 5.553 | 112377 | 79.98  |

HPLC chromatogram of 7i

**DEPARTMENT OF PHARMACEUTICAL CHEMISTRY  
KLE COLLEGE OF PHARMACY, BELAGAVI**

**SAMPLE INFORMATION**

|                   |                            |                     |                          |
|-------------------|----------------------------|---------------------|--------------------------|
| Sample Name:      | 7i                         | Acquired By:        | User_1                   |
| Sample Type:      | Unknown                    | Sample Set Name:    | Trial1_23102024_SS       |
| Vial:             | 10                         | Acq. Method Set:    | Trial1_23102024_MS       |
| Injection #:      | 1                          | Processing Method:  | 7i Processing            |
| Injection Volume: | 10.00 ul                   | Channel Name:       | 223.0nm                  |
| Run Time:         | 10.0 Minutes               | Proc. Chnl. Descr.: | 2998 PDA 223.0 nm (2998) |
| Date Acquired:    | 23-10-2024 12:39:28 PM IST |                     |                          |
| Date Processed:   | 25-10-2024 09:35:10 AM IST |                     |                          |

**Auto-Scaled Chromatogram**

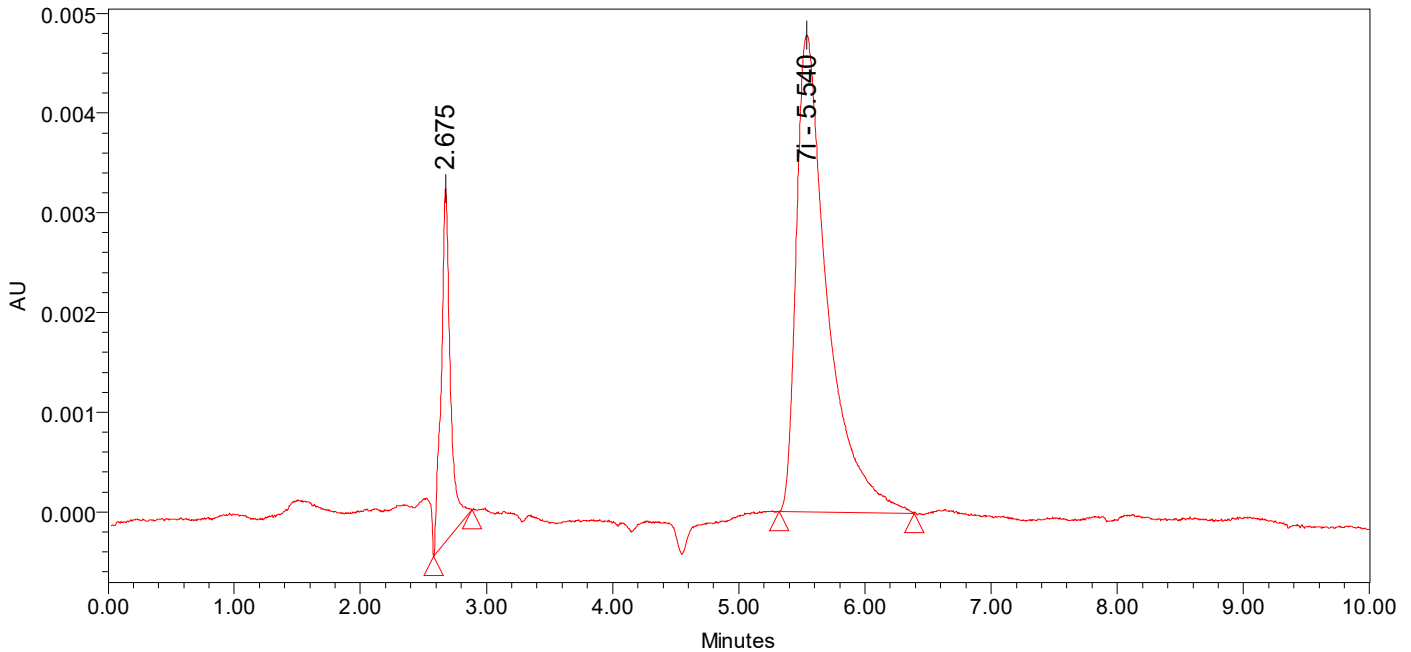

Peak Results

|   | Name | RT    | Area  | % Area |
|---|------|-------|-------|--------|
| 1 |      | 2.675 | 17805 | 17.86  |
| 2 | 7i   | 5.540 | 81889 | 82.14  |

HPLC chromatogram of 7j

**DEPARTMENT OF PHARMACEUTICAL CHEMISTRY  
KLE COLLEGE OF PHARMACY, BELAGAVI**

**SAMPLE INFORMATION**

|                   |                            |                     |                          |
|-------------------|----------------------------|---------------------|--------------------------|
| Sample Name:      | 7j                         | Acquired By:        | User_1                   |
| Sample Type:      | Unknown                    | Sample Set Name:    | Trial1_23102024_SS       |
| Vial:             | 11                         | Acq. Method Set:    | Trial1_23102024_MS       |
| Injection #:      | 1                          | Processing Method:  | 7j                       |
| Injection Volume: | 10.00 ul                   | Channel Name:       | 223.0nm                  |
| Run Time:         | 10.0 Minutes               | Proc. Chnl. Descr.: | 2998 PDA 223.0 nm (2998) |
| Date Acquired:    | 23-10-2024 12:50:09 PM IST |                     |                          |
| Date Processed:   | 25-10-2024 09:56:46 AM IST |                     |                          |

**Auto-Scaled Chromatogram**

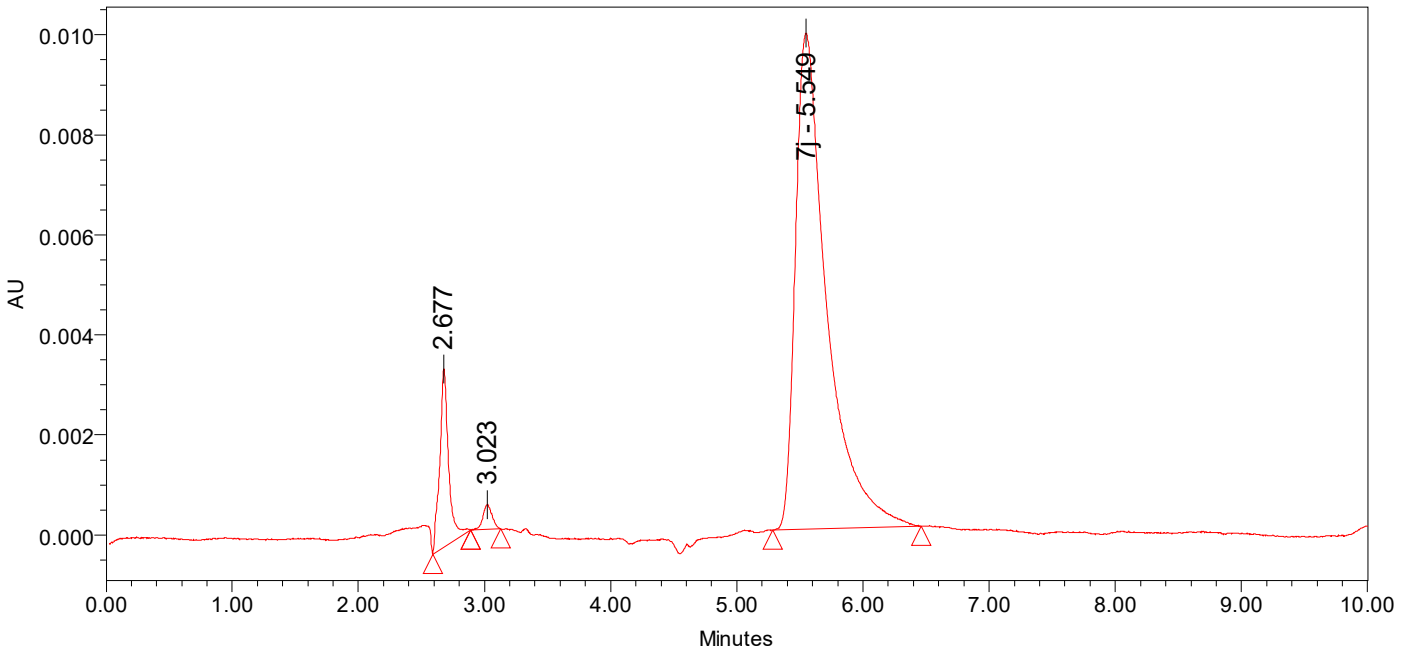

Peak Results

| Name | RT    | Area  | % Area |
|------|-------|-------|--------|
| 1    | 2.677 | 17499 | 9.14   |
| 2    | 3.023 | 2554  | 1.33   |

| Name | RT    | Area   | % Area |
|------|-------|--------|--------|
| 3 7j | 5.549 | 171486 | 89.53  |

HPLC chromatogram of 7k

**DEPARTMENT OF PHARMACEUTICAL CHEMISTRY**  
**KLE COLLEGE OF PHARMACY, BELAGAVI**

**SAMPLE INFORMATION**

|                                            |              |                     |                          |
|--------------------------------------------|--------------|---------------------|--------------------------|
| Sample Name:                               | 7k           | Acquired By:        | User_1                   |
| Sample Type:                               | Unknown      | Sample Set Name:    | Trial1_23102024_SS       |
| Vial:                                      | 12           | Acq. Method Set:    | Trial1_23102024_MS       |
| Injection #:                               | 1            | Processing Method:  | 7k                       |
| Injection Volume:                          | 10.00 ul     | Channel Name:       | 223.0nm                  |
| Run Time:                                  | 10.0 Minutes | Proc. Chnl. Descr.: | 2998 PDA 223.0 nm (2998) |
| Date Acquired: 23-10-2024 01:00:51 PM IST  |              |                     |                          |
| Date Processed: 25-10-2024 09:37:41 AM IST |              |                     |                          |

**Auto-Scaled Chromatogram**

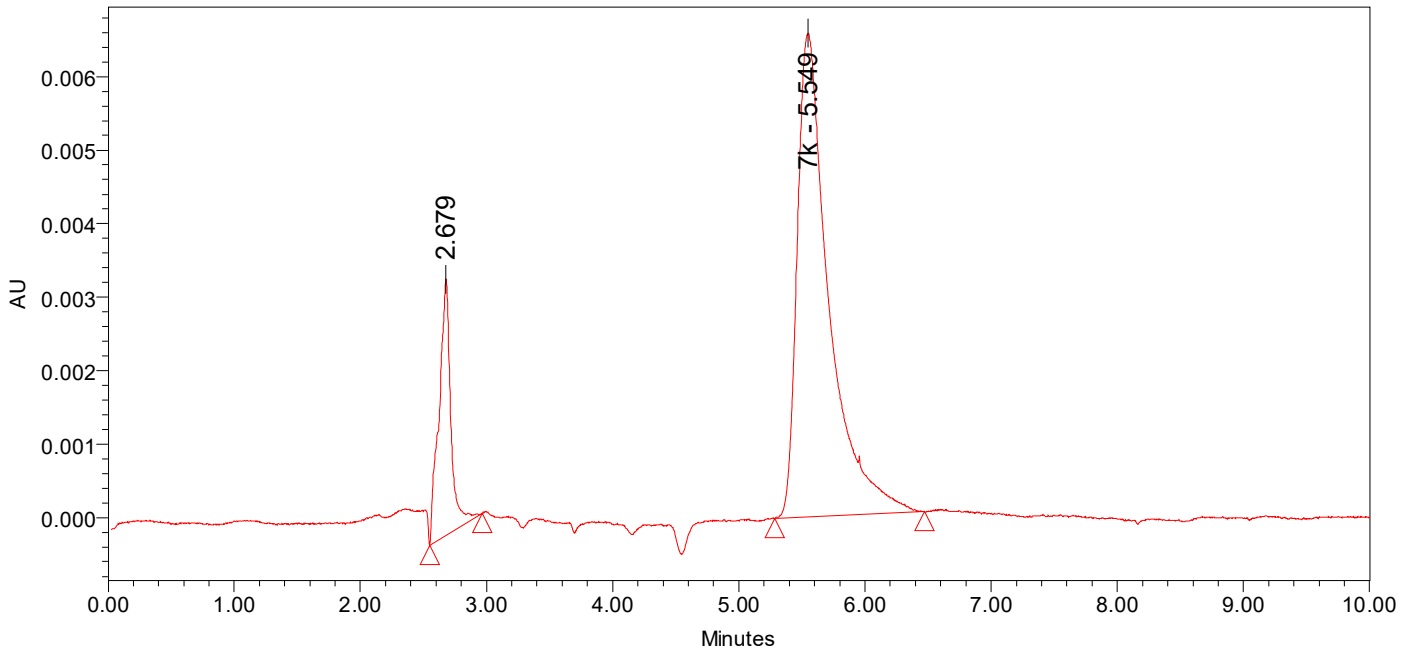

Peak Results

|   | Name | RT    | Area   | % Area |
|---|------|-------|--------|--------|
| 1 |      | 2.679 | 22804  | 16.55  |
| 2 | 7k   | 5.549 | 115001 | 83.45  |

HPLC chromatogram of 7I

**DEPARTMENT OF PHARMACEUTICAL CHEMISTRY**  
**KLE COLLEGE OF PHARMACY, BELAGAVI**

**SAMPLE INFORMATION**

|                   |                            |                     |                          |
|-------------------|----------------------------|---------------------|--------------------------|
| Sample Name:      | 7I                         | Acquired By:        | User_1                   |
| Sample Type:      | Unknown                    | Sample Set Name:    | Trial1_23102024_SS       |
| Vial:             | 13                         | Acq. Method Set:    | Trial1_23102024_MS       |
| Injection #:      | 1                          | Processing Method:  | 7I Processing            |
| Injection Volume: | 10.00 ul                   | Channel Name:       | 223.0nm                  |
| Run Time:         | 10.0 Minutes               | Proc. Chnl. Descr.: | 2998 PDA 223.0 nm (2998) |
| Date Acquired:    | 23-10-2024 01:11:30 PM IST |                     |                          |
| Date Processed:   | 25-10-2024 09:40:36 AM IST |                     |                          |

Auto-Scaled Chromatogram

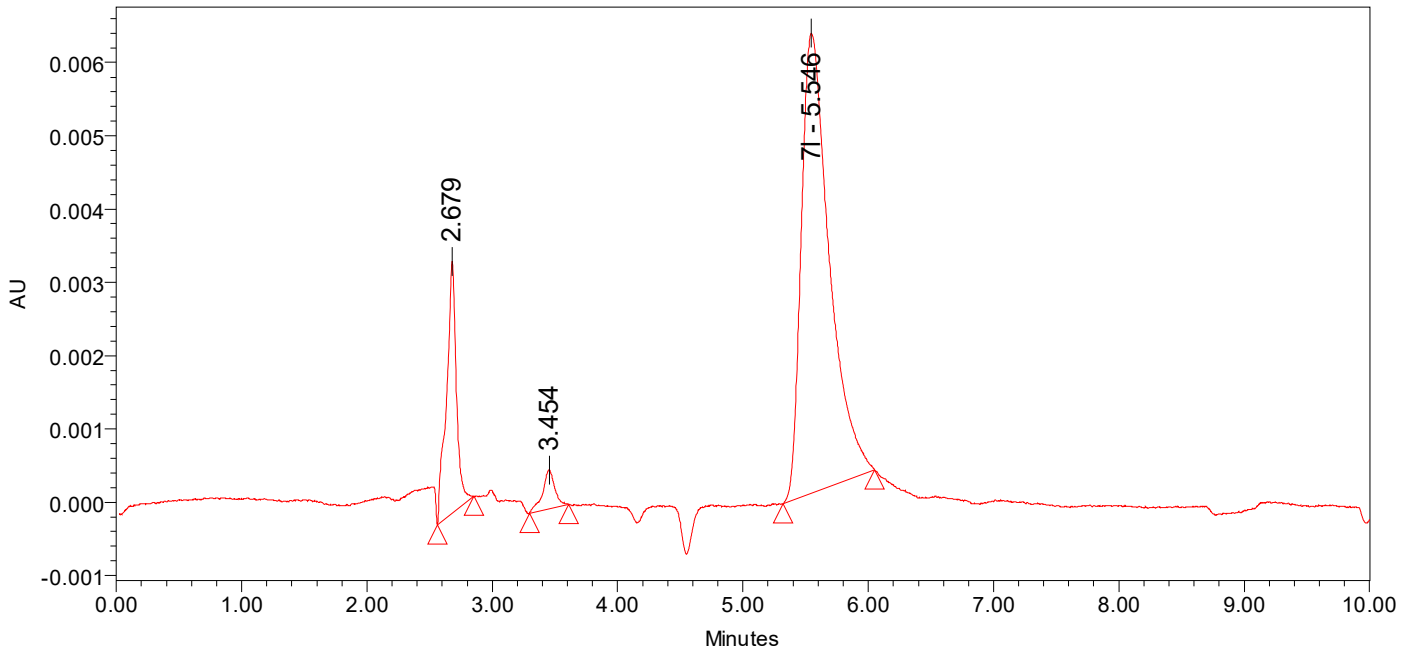

Peak Results

| Name | RT    | Area  | % Area |
|------|-------|-------|--------|
| 1    | 2.679 | 18760 | 15.61  |
| 2    | 3.454 | 3559  | 2.96   |

| Name | RT    | Area  | % Area |
|------|-------|-------|--------|
| 3 7I | 5.546 | 97847 | 81.43  |
